# Supplementary material for: Conflict of interest and funding in health communication on social media: a systematic review
Source: PubMed Central journal article supplement — BMJ Open. 2023 Aug 14;13(8):e072258. doi: 10.1136/bmjopen-2023-072258 (PMC10432670; doi:10.1136/bmjopen-2023-072258), 2023-08-14
Supplement: bmjopen-2023-072258.draft_revisions.pdf [file bmjopen-2023-072258.draft_revisions.pdf]

# BMJ Open

BMJ Open is committed to open peer review. As part of this commitment we make the peer review history of every article we publish publicly available.

When an article is published we post the peer reviewers' comments and the authors' responses online. We also post the versions of the paper that were used during peer review. These are the versions that the peer review comments apply to.

The versions of the paper that follow are the versions that were submitted during the peer review process. They are not the versions of record or the final published versions. They should not be cited or distributed as the published version of this manuscript.

BMJ Open is an open access journal and the full, final, typeset and author-corrected version of record of the manuscript is available on our site with no access controls, subscription charges or pay-per-view fees (<http://bmjopen.bmj.com>).

If you have any questions on BMJ Open's open peer review process please email [info.bmjopen@bmj.com](mailto:info.bmjopen@bmj.com)

# BMJ Open

## Conflict of interest and funding in health communication on social media: a systematic survey

|                               |                                                                                                                                                                                                                                                                                                                                                                                                                                                                                                                                                                                                                                                                                                                                                                                                                                                                                                                                                                                                                                                                                                                                                                                                                 |
|-------------------------------|-----------------------------------------------------------------------------------------------------------------------------------------------------------------------------------------------------------------------------------------------------------------------------------------------------------------------------------------------------------------------------------------------------------------------------------------------------------------------------------------------------------------------------------------------------------------------------------------------------------------------------------------------------------------------------------------------------------------------------------------------------------------------------------------------------------------------------------------------------------------------------------------------------------------------------------------------------------------------------------------------------------------------------------------------------------------------------------------------------------------------------------------------------------------------------------------------------------------|
| Journal:                      | <i>BMJ Open</i>                                                                                                                                                                                                                                                                                                                                                                                                                                                                                                                                                                                                                                                                                                                                                                                                                                                                                                                                                                                                                                                                                                                                                                                                 |
| Manuscript ID                 | bmjopen-2023-072258                                                                                                                                                                                                                                                                                                                                                                                                                                                                                                                                                                                                                                                                                                                                                                                                                                                                                                                                                                                                                                                                                                                                                                                             |
| Article Type:                 | Original research                                                                                                                                                                                                                                                                                                                                                                                                                                                                                                                                                                                                                                                                                                                                                                                                                                                                                                                                                                                                                                                                                                                                                                                               |
| Date Submitted by the Author: | 26-Jan-2023                                                                                                                                                                                                                                                                                                                                                                                                                                                                                                                                                                                                                                                                                                                                                                                                                                                                                                                                                                                                                                                                                                                                                                                                     |
| Complete List of Authors:     | <p>Helou, Vanessa; American University of Beirut, Faculty of Medicine<br/> Mouzahem, Fatima; American University of Beirut, Faculty of Health Sciences<br/> Makarem, Adham; American University of Beirut, Faculty of Medicine;<br/> Boston University, School of Public Health<br/> Noueldine, Hussein; Lebanese American University, Gilbert and Rose-Marie Chagoury School of Medicine<br/> El-Khoury, Rayane; American University of Beirut Medical Center, Clinical Research Institute; Weill Cornell Medicine, World Health Organization Collaborating Centre for Disease Epidemiology Analytics on HIV/AIDS, Sexually Transmitted Infections, and Viral Hepatitis<br/> Al Oweini, Dana; American University of Beirut, Faculty of Medicine<br/> Halak, Razan; American University of Beirut, Faculty of Medicine<br/> Hneiny, Layal; American University of Beirut, Saab Medical Library;<br/> University of South Dakota, Wegner Health Sciences Library<br/> Khabza, Joanne; American University of Beirut, Clinical Research Institute<br/> Akl, Elie; American University of Beirut Medical Center, Department of Internal Medicine ; McMaster University, Department of Health Research Methods</p> |
| Keywords:                     | MEDICAL ETHICS, BIOTECHNOLOGY & BIOINFORMATICS, Health informatics < BIOTECHNOLOGY & BIOINFORMATICS, Health & safety < HEALTH SERVICES ADMINISTRATION & MANAGEMENT                                                                                                                                                                                                                                                                                                                                                                                                                                                                                                                                                                                                                                                                                                                                                                                                                                                                                                                                                                                                                                              |
|                               |                                                                                                                                                                                                                                                                                                                                                                                                                                                                                                                                                                                                                                                                                                                                                                                                                                                                                                                                                                                                                                                                                                                                                                                                                 |

SCHOLARONE™  
Manuscripts

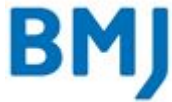

I, the Submitting Author has the right to grant and does grant on behalf of all authors of the Work (as defined in the below author licence), an exclusive licence and/or a non-exclusive licence for contributions from authors who are: i) UK Crown employees; ii) where BMJ has agreed a CC-BY licence shall apply, and/or iii) in accordance with the terms applicable for US Federal Government officers or employees acting as part of their official duties; on a worldwide, perpetual, irrevocable, royalty-free basis to BMJ Publishing Group Ltd ("BMJ") its licensees and where the relevant Journal is co-owned by BMJ to the co-owners of the Journal, to publish the Work in this journal and any other BMJ products and to exploit all rights, as set out in our [licence](#).

The Submitting Author accepts and understands that any supply made under these terms is made by BMJ to the Submitting Author unless you are acting as an employee on behalf of your employer or a postgraduate student of an affiliated institution which is paying any applicable article publishing charge ("APC") for Open Access articles. Where the Submitting Author wishes to make the Work available on an Open Access basis (and intends to pay the relevant APC), the terms of reuse of such Open Access shall be governed by a Creative Commons licence – details of these licences and which [Creative Commons](#) licence will apply to this Work are set out in our licence referred to above.

Other than as permitted in any relevant BMJ Author's Self Archiving Policies, I confirm this Work has not been accepted for publication elsewhere, is not being considered for publication elsewhere and does not duplicate material already published. I confirm all authors consent to publication of this Work and authorise the granting of this licence.

## **Conflict of interest and funding in health communication on social media: a systematic survey**

Vanessa Helou<sup>1</sup>, Fatima Mouzahem<sup>2</sup>, Adham Makarem<sup>1,3</sup>, Hussein A. Noureldine<sup>4</sup>, Rayane Al Khoury<sup>5,6</sup>, Dana Al Oweini<sup>1</sup>, Razan Halak<sup>1</sup>, Layal Hneiny<sup>7</sup>, Joanne Khabza<sup>5</sup>, Elie A. Akl<sup>8,9</sup>

<sup>1</sup>Faculty of Medicine, American University of Beirut, Beirut, Lebanon

<sup>2</sup>Faculty of Health Sciences, American University of Beirut, Beirut, Lebanon

<sup>3</sup>School of Public Health, Boston University, Boston, Massachusetts, USA

<sup>4</sup>LAU Gilbert and Rose-Marie Chaghoury School of Medicine, Lebanese American University, Byblos, Lebanon

<sup>5</sup>Clinical Research Institute, American University of Beirut Medical Center, Beirut, Lebanon

<sup>6</sup>Infectious Disease Epidemiology Group & World Health Organization Collaborating Centre for Disease Epidemiology Analytics on HIV/AIDS, Sexually Transmitted Infections, and Viral Hepatitis, Weill Cornell Medicine, Doha, Qatar

<sup>7</sup>Wegner Health Sciences Library, University of South Dakota, Sioux Falls, USA & Saab Medical Library, University Libraries, American University of Beirut, Beirut, Lebanon

<sup>8</sup>Department of Health Research Methods, Evidence, and Impact (HEI), McMaster University, Canada

<sup>9</sup>Department of Internal Medicine, American University of Beirut Medical Center, Beirut, Lebanon

### **Corresponding author:**

Elie A. Akl, MD, MPH, PhD

Department of Internal Medicine, American University of Beirut Medical Center

P.O. Box: 11-0236, Riad-El-Solh Beirut 1107 2020

Beirut – Lebanon

Phone: 00961 1 374374; Email: [ea32@aub.edu.lb](mailto:ea32@aub.edu.lb)

**Word count:** 2664

**Keywords:** conflict of interest, disclosure, funding and social media

## ABSTRACT

**Objectives:** To synthesize the available evidence on the reporting of conflicts of interest (COI) by individuals posting health messages on social media, and on the reporting of funding sources of studies cited in health messages on social media.

**Data Sources:** Medline(OVID) (2005-March 2022), Embase (2005-March 2022) and Google Scholar (2005-August 2022), supplemented with a review of reference lists and forward citation tracking.

**Design:** Reviewers selected eligible studies and abstracted data in duplicate and independently. We appraised the quality of the included studies using the Mixed Methods Appraisal Tool. We summarized the results in both narrative and tabular formats. We followed the PRISMA 2020 checklist for reporting our study.

**Results:** Of a total of 16,645 retrieved citations, we included 17 eligible studies. The frequency of reporting of conflicts of interest varied between 0% and 60%, but it was mostly low. In addition, a significant proportion, ranging between 15-80%, of healthcare professionals using social media have financial relationships with industry. However, three studies assessed the proportion of conflicts of interest of physicians identified through Open Payment Database (OPD) but not reported by the authors. It was found that 98.7-100% of these relationships with industry are not reported when communicating health-related information. Also, two studies showed that there is evidence of a potential association between COI and the content of posting. No data was found on the reporting of funding sources of studies cited in health messages on social media.

**Conclusions:** While a significant proportion of healthcare professionals using social media have financial relationships with industry, lack of reporting on COI and undisclosed COI are common. We did not find studies on the reporting of funding sources of studies cited in health messages on social media.

**Funding:** none

**Registration:** [dx.doi.org/10.17504/protocols.io.5jyl8jj4rg2w/v1](http://dx.doi.org/10.17504/protocols.io.5jyl8jj4rg2w/v1)

## ARTICLE SUMMARY

### Strengths and limitations of this study

- This is the first systematic survey on the subject of reporting of conflicts of interest in social media.
- The study applied standard methodology for conducting systematic reviews (including a comprehensive search, duplicate screening, and data abstraction).
- We found a relatively limited number of eligible studies.
- Meta-analysis was not conducted due to heterogeneity of the included studies.

## INTRODUCTION

The traditional internet has expanded to a more dynamic and interactive entity referred to as “Web 2.0” [1]. Web 2.0 allows its users to create and share content as well as communicate and interact with other users [1]. It differs from Web 1.0 in that content and applications of the web are no longer necessarily created by specific individuals but by all internet users, and constantly modified by them [2]. It includes various social media platforms such as blogs, Twitter, Facebook, Instagram, and YouTube [1].

Many individuals rely on the internet to answer their medical questions. While 90% of health care professionals use social media platforms for personal purposes, 65% use them for professional reasons such as promotion of health behaviors, discussions of health care policy, communicating with colleagues, and education of patients, peers, and students [3]. Within recent years, the use of social media by health care professionals has increased significantly with some estimates reporting increases from 42% in 2010 to as high as 90% in 2011 [4].

However, professionals may have conflicts of interest (COI) that may bias their postings on their platforms [4]. In general, conflicts of interest can be either individual or institutional, financial or non-financial.[5] While financial COI entail receiving grants, personal fees, trips, honoraria or stock ownership, non-financial COI include career advancement, political or ideological beliefs, strong scientific opinions, fame, and social interests.

Reporting COIs allow their acknowledgment and incorporation in the public’s interpretation of information posted on social media [4]. That in turn should enhance public trust in the medical profession. Many medical associations have developed guidelines on physicians’ use of social media, including reporting of COI [6-8]. However, there are many challenges to reporting COI on social media. Social media posts are often brief with character limitation [4]. Also, a layperson may interpret COI statements differently than other professional users such as physicians and scientists [4].

Very limited research has been done on the topic of conflicts of interest and funding in social media. Previous studies considered COI reporting as part of measures of online professionalism [9], or as an indicator to assess credibility and quality of online information [10-13]. McCarthy et al discussed the urgent need for “more research examining the prevalence, impact of physicians’ COI on social media content, and appropriate management strategies” [4].

The objective of this study is to synthesize the available evidence on the reporting of conflicts of interest by individuals posting health messages on social media, and on the reporting of funding sources of studies cited in health messages on social media.

## METHODS

### Design overview and definitions

We conducted a systematic survey of the published peer reviewed literature. We referred to the following definition of COI: “a COI exists when a past, current, or expected interest creates a significant risk of inappropriately influencing an individual’s judgment, decision, or action when carrying out a specific duty” [5]. We considered COI a concept relevant to a social media account of an individual or an organization (which would include the funding by a specific organization). We considered funding a concept relevant to a research study or project.

Table 1 shows the terms used for different scenarios that vary by whether COI exists or not, and whether a COI reporting statement is available.

**Table 1** Problems associated with scenarios varying by whether COI exists or not, and whether a COI reporting statement is available.

|                               | No COI exists                            | COI exists                             |
|-------------------------------|------------------------------------------|----------------------------------------|
| No statement reporting on COI | Lack of reporting but no undisclosed COI | Lack of reporting with undisclosed COI |
| Statement reporting no COI    | No problem                               | Undisclosed COI                        |
| Statement reporting COI       | Over-reporting of COI                    | No problem                             |

We used the following definition of social media: “a group of applications which is based on ideological and technological foundations of Web 2.0 that allows the creation and exchange of user-generated content” [1].

We developed and published a detailed protocol for this review on protocols.io [14], (included in *supplementary file 1*). We followed the PRISMA 2020 checklist to report our study [15].

### Eligibility criteria

We included articles that meet the following eligibility criteria:

- Topic: conflict of interest on social media or funding;
- Type of social media: all platforms that fit the Web 2.0 definition, including blogs, Facebook, Instagram, Twitter, LinkedIn, and YouTube;



- Field: health field, including clinical, health systems and policy, public health and biomedical sciences;
- Study design: any primary study including surveys, research letters, and qualitative studies. We excluded editorials, abstracts, letters to the editor, reviews, and opinion pieces;
- Date of publication: 2005 to current (2005 being the year of the rise of Web 2.0);
- Language: any language.

## Search strategy

We searched Medline(OVID) (2005-March 2022), Embase (2005-March 2022) and Google Scholar (2005-August 2022). The search strategies included both keywords and medical subject headings (MeSH terms) relevant to the concepts of conflict of interest, funding, and social media. We developed the search strategies with the help of an experienced librarian and included them in the supplementary file (*supplementary file 2*). We conducted our search in the databases with no restrictions on the language. We restricted the search by year (2005 and beyond). In addition, we screened the reference lists of included studies and forward searched for publications citing these included studies via Google Scholar.

## Study selection

Teams of two reviewers screened in duplicate and independently the titles and abstracts of citations identified by the search using Rayyan screening tool. We retrieved the full texts of citations judged as potentially eligible by at least one reviewer. Reviewers subsequently screened the full texts in duplicate and independently. They resolved any disagreement by discussion or with the help of a third reviewer when consensus could not be reached. We used standardized and pilot-tested screening tools. We recorded the reasons for exclusion and summarized the results of the selection process using the 2020 PRISMA flow diagram [15]. The reviewers conducted calibration exercises before the screening process.

## Data collection process

We developed a standardized and pilot-tested data extraction form with detailed instructions. Two teams of two reviewers abstracted the data from eligible studies independently and in duplicate using a standardized pilot tested form. The reviewers completed calibration exercises before starting the data collection process. They resolved any disagreements by discussion between the two reviewers or with the help of the principal investigator.

We extracted the following variables into a Word document:

1. General characteristics of the study:

- 1
  - 2
  - 3
  - 4
  - 5
  - 6
  - 7
  - 8
  - 9
  - 10
  - 11
  - 12
  - 13
  - 14
  - 15
  - 16
  - 17
  - 18
  - 19
  - 20
  - 21
  - 22
  - 23
  - 24
  - 25
  - 26
  - 27
  - 28
  - 29
  - 30
  - 31
  - 32
  - 33
  - 34
  - 35
  - 36
  - 37
  - 38
  - 39
  - 40
  - 41
  - 42
  - 43
  - 44
  - 45
  - 46
  - 47
  - 48
  - 49
  - 50
  - 51
  - 52
  - 53
  - 54
  - 55
  - 56
  - 57
  - 58
  - 59
  - 60
- Type of healthcare professionals: physicians, nurses, or other;
  - Year of conduct;
  - Study design;
  - Funding of the study;
  - COI of study authors;
  - Country of study authors

## 2. Social media:

- Type: e.g., Facebook, twitter, Instagram, YouTube, LinkedIn;
- Number of posts, videos, or blogs assessed;
- Language of posts, videos, or blogs;
- Country of the subjects of study;
- Topic focus of the study, if any.

## 3. Conflicts of interest:

- Type of conflict of interest;
- Subject of conflict of interest;
- Source of conflict of interest;
- Tools used to assess the presence of financial relationships;
- Prevalence of conflict of interest, verified or suspected;
- Frequency of reporting of conflict of interest;
- Proportion of undisclosed conflict of interest;
- Proportion of organizations reporting undisclosed conflict of interest;
- Association between conflict of interest and post content.

## 4. Funding:

- Source of funding;
- Amount of funding;
- Role of funder.

### **Quality assessment and data synthesis**

A team of two reviewers assessed independently the risk of bias of included studies using the Mixed Methods Appraisal Tool. This tool is designed for the appraisal stage of systematic reviews that include qualitative, quantitative, or mixed methods studies [16]. Due to the nature of the data, we report the results in narrative and tabular formats.

## Patient and public involvement

We did not involve patients or the public in the design, conduct, reporting, or dissemination plans of our research.

## RESULTS

### Study selection

The PRISMA flowchart (*supplementary file 3*) depicts the study selection process. We excluded 198 studies at the full text screening stage for the following reasons: not about conflicts of interest or funding (n=116), not about social media (n=33), and not the study design of interest (n=66) (*supplementary file 4*). We judged 17 studies to be eligible.

### General characteristics

All of 17 included studies were cross-sectional and reported quantitative data. Table 2 shows the remaining general characteristics of these studies. The majority of studies were survey of social media posts (88%), had the United States or Canada as the country of the study subjects (53%), focused on posts in English language (88%), and focused on a specific health specialty (71%). The median year of posts upload date was 2018. The social media most assessed were Twitter (29%), YouTube videos (29%), and blogs (29%).

**Table 2** General characteristics of included studies (N=17)

|                                   | n (%)     |
|-----------------------------------|-----------|
| <b>Study design</b>               |           |
| Survey of posts                   | 13 (76%)  |
| Median sample size (IQR)          | 159 (879) |
| Survey of individuals or accounts | 4 (24%)   |
| Median sample size (IQR)          | 117 (205) |
| <b>Funding of the study</b>       |           |
| Funded                            | 4 (24%)   |
| Not funded                        | 6 (35%)   |

|                                                     |          |
|-----------------------------------------------------|----------|
| Not reported                                        | 7 (41%)  |
| <b>Conflict of interest of study authors</b>        |          |
| Conflict of interest reported                       | 5 (29%)  |
| No conflict of interest                             | 11 (65%) |
| Not reported                                        | 1 (6%)   |
| <b>Study focused on a specific health specialty</b> | 12 (71%) |
| <b>Type of social media</b>                         |          |
| Twitter                                             | 5 (29%)  |
| Blogs                                               | 5 (29%)  |
| YouTube                                             | 5 (29%)  |
| Not specified                                       | 2 (12%)  |
| <b>Language of posts<sup>§</sup></b>                |          |
| English                                             | 15 (88%) |
| Other languages                                     | 4 (24%)  |
| No language restriction                             | 1 (6%)   |
| <b>Time period covered</b>                          |          |
| ≤1 year                                             | 4 (24%)  |
| 11-12 years                                         | 4 (24%)  |
| Not specified                                       | 9 (53%)  |
| <b>Median year of post date (IQR)</b>               | 2018 (3) |
| <b>Country of the subjects of study<sup>§</sup></b> |          |
| United States of America                            | 7 (41%)  |
| Canada                                              | 2 (12%)  |
| Europe                                              | 2 (12%)  |
| Asia                                                | 2 (12%)  |

|                                                       |         |
|-------------------------------------------------------|---------|
| United Kingdom                                        | 1 (6%)  |
| Australia                                             | 2 (12%) |
| Not reported                                          | 6 (35%) |
| No restrictions to countries                          | 1 (6%)  |
| <b>Outcome<sup>§</sup></b>                            |         |
| Prevalence of COI                                     | 5 (29%) |
| Frequency of reporting of COI                         | 8 (47%) |
| Proportion of undisclosed COI                         | 3 (18%) |
| Proportion of organizations reporting undisclosed COI | 2 (12%) |
| Association between COI and post content              | 2 (12%) |

§ Some studies included more than one language, country, or outcome

Table 3 shows the characteristics of COI in health communication on social media in the included studies. The majority of the studies had physicians as their study population (76%), specified industry as the source of COI (65%), and did not specify the types of COI studied (59%).

**Table 3** Characteristics of COI in health communication on social media assessed in the included studies (N= 17)

|                                      | n (%)    |
|--------------------------------------|----------|
| <b>Subjects of COI</b>               |          |
| Physicians                           | 13 (76%) |
| Medical students                     | 1 (6%)   |
| University                           | 4 (24%)  |
| Healthcare entity (hospital, clinic) | 4 (24%)  |
| Others <sup>o</sup>                  | 9 (53%)  |
| <b>Source of COI</b>                 |          |

|                     |          |
|---------------------|----------|
| Industry            | 11 (65%) |
| Others <sup>δ</sup> | 2 (12%)  |
| Not specified       | 6 (35%)  |
| <b>Types of COI</b> |          |
| Financial           | 7 (41%)  |
| Not specified       | 10 (59%) |

<sup>δ</sup>Others: non-physician health professionals (nurses, dietitians, nutritionists, pharmacists, chiropractors, acupuncturists), patients, societies/organizations (foundations, governmental institutions, academic journals), industry, news media, and bloggers.

<sup>δ</sup> Others: Volunteer donation, foundation, insurer, not-for-profit, webhost, or corporation entity.

## Findings

We did not find evidence on the reporting of funding sources of studies cited in health messages on social media. With regards to COI reporting, the included studies assessed one or more of the following 5 outcomes: (1) prevalence of COI, verified or suspected (n=5); (2) frequency of reporting of COI (n=8); (3) proportion of undisclosed COI (n=3); (4) proportion of organizations reporting undisclosed COI (n=2); and (5) association between COI and post content (n=2). We provide the full details in supplementary file 5 and summarize them narratively in the following paragraphs. Supplementary file 6 includes the results of the risk of bias assessment of the included studies. No major concerns were noted.

### Prevalence of COI, verified or suspected

Table 4 presents the results from five studies on the prevalence of COI. The prevalence of verified COI (using Open Payment Database) ranged between 15% and 80%. The prevalence of suspected COI (based on authors' judgement) ranged between 0% and 80%.

**Table 4** Results from five studies on the prevalence of COI

| Study           | Social Media | Health condition | Prevalence of COI<br>(n of authors with<br>COI / N total<br>authors) |
|-----------------|--------------|------------------|----------------------------------------------------------------------|
| <i>Verified</i> |              |                  |                                                                      |

|                     |         |                            |                                                                                                                                                |
|---------------------|---------|----------------------------|------------------------------------------------------------------------------------------------------------------------------------------------|
| Niforatos 2019 [17] | Blogs   | Emergency medicine         | <b>15.4%</b> (45/292) of U.S.-based healthcare providers                                                                                       |
| Tao 2017 [18]       | Twitter | Hematology-oncology        | <b>79.5%</b> (504/634) of U.S.-based hematologist-oncologists                                                                                  |
| Walradt 2021 [19]   | Twitter | Gastrointestinal endoscopy | <b>37%</b> (7/19) of tweets that mentioned the name of a medical device were posted by a U.S physician who had received a payment              |
| <i>Suspected</i>    |         |                            |                                                                                                                                                |
| Toth 2019 [12]      | Blogs   | Detox diets industry       | <b>80%</b> (4/5) of nutritionist blog posts had a 'potential' COI<br><br><b>None</b> of registered dietitians blog posts had a 'potential' COI |
| Chretien 2011 [20]  | Twitter | General                    | <b>0.2%</b> (12/5156) of tweets involved 'possible' conflicts of interest                                                                      |

### Frequency of reporting COI

Table 5 presents the results of eight studies on the frequency of COI reporting. The frequency ranged from 0% to 60%. It was not clear from any of the studies whether the percentage referred to the number of COI statements (whether reporting the existing or not of COI) or to the number of statements reporting a COI.

**Table 5** Results from eight studies on the frequency of reporting COI

| Study                | Social Media                                 | Health condition                                                                     | Frequency (n of posts reporting COI / N total posts)                                                                                      |
|----------------------|----------------------------------------------|--------------------------------------------------------------------------------------|-------------------------------------------------------------------------------------------------------------------------------------------|
| Betschart 2020 [21]  | YouTube                                      | Treatment options for lower urinary tract symptoms with benign prostatic hyperplasia | <b>2%</b> (2/159) (COI reporting)                                                                                                         |
| Lagu 2008 [22]       | Blogs                                        | General                                                                              | <b>0%</b> (0/271) (COI reporting)                                                                                                         |
| Nishizaki 2021 [23]  | Japanese YouTube videos                      | Pediatrics: nocturnal enuresis                                                       | <b>0%</b> (0/72) (COI reporting)                                                                                                          |
| Pratsinis 2021 [24]  | YouTube                                      | Treatment options of urinary stones                                                  | <b>9%</b> (9/100) (COI reporting)                                                                                                         |
| Pratsinis, 2021 [25] | YouTube                                      | Benign prostatic hyperplasia, prostate cancer, and urinary stone disease             | “Majority” did not have COI disclosure<br>Estimated: 46/240 (COI reporting)                                                               |
| Vu 2021 [26]         | YouTube                                      | Treatment of prostate cancer: surgical therapy versus radiotherapy                   | <b>10%</b> (surgery) and <b>5%</b> (radiotherapy) (COI reporting)                                                                         |
| Miller 2011 [11]     | Blogs                                        | General                                                                              | <b>15.6%</b> (148/951) of health blogs reported sponsorship                                                                               |
| Shrank 2011 [27]     | Social networking sites (93% featured blogs) | Diabetes information                                                                 | 1. Industry sponsorship:<br>- Pharmaceutical manufacturers: <b>53.3%</b> (8/15)<br><br>- Diabetes device manufacturers: <b>60%</b> (9/15) |



|  |  |  |                                                                                                                                                                                                                                                                                                                                                                                |
|--|--|--|--------------------------------------------------------------------------------------------------------------------------------------------------------------------------------------------------------------------------------------------------------------------------------------------------------------------------------------------------------------------------------|
|  |  |  | <ul style="list-style-type: none"> <li>- Webhost Sponsorship:<br/><b>13.3% (2/15)</b></li> <li>2. Foundation sponsorship:<br/><b>20% (3/15)</b></li> <li>3. Voluntary donations:<br/><b>26.7% (4/15)</b></li> <li>4. No industry sponsorship:<br/><b>20% (3/15)</b></li> <li>5. Insurers:<br/><b>20% (3/15)</b></li> <li>6. Not-for-profit:<br/><b>26.7% (4/15)</b></li> </ul> |
|--|--|--|--------------------------------------------------------------------------------------------------------------------------------------------------------------------------------------------------------------------------------------------------------------------------------------------------------------------------------------------------------------------------------|

#### Proportion of undisclosed COI

We identified three studies reporting on the proportion of undisclosed COI. The proportion values were 99%, 100%, and 100% [17, 19, 28]. All three studies assessed the proportion of COI identified through Open Payment Database but not reported by the authors. It was not clear from any of the studies whether the proportion referred to those who reported no COI or those who had no COI statement.

#### Proportion of organizations reporting undisclosed COI

We identified two studies on the proportion of organizations reporting undisclosed COI. Chretien et al. [29] surveyed 130 deans of student affairs from institutions in the Association of American Medical Colleges. Out of the 78 deans who responded, 3% (2/78) reported unprofessional incidents related to product endorsement without reporting COI.

Greysen et al. [9] surveyed 48 executive directors of state medical boards about US-based physicians' violations of online professionalism. An estimated percentage of 56% indicated that they received reports of violations related to "failure to reveal conflicts of interest online".

#### Association between COI and content of posting

We identified two studies on the association between COI and the content of posting. Kaestner et al. [28] analyzed tweets of 156 US-based hematologist-oncologists on oncology drugs; they also verified the physicians' financial conflicts of interest using Open Payments Database. The

1  
2  
3 authors found that tweets were more likely to be positive ( $p=0.02$ ) when they related to drugs  
4 from a company for which they had a financial COI compared with drugs from a company for  
5 which they did not have a financial COI.  
6

7 Hessari et al.[30] assessed 1156 tweets of alcohol industry-funded organizations and 1649 tweets  
8 of non- alcohol industry-funded charities, with all entities aiming to raise alcohol awareness.  
9 While 10.1% ( $n=166/1649$ ) of the non- alcohol industry-funded organizations tweets mentioned  
10 alcohol marketing, advertising, sponsorship, issues related to alcohol pricing and physical health  
11 harms, none ( $n=0/1156$ ) of the alcohol industry -funded organizations tweets mentioned those  
12 topics.  
13  
14  
15

## 16 17 18 **DISCUSSION**

### 19 20 **Summary of evidence**

21 We systematically surveyed the literature for the reporting of COI by individuals posting health  
22 messages on social media, and on the reporting of funding sources of studies cited in health  
23 messages on social media. The frequency of reporting of COI varied across studies but was mostly  
24 low (less than 15%). A significant proportion of healthcare professionals using social media have  
25 financial relationships with industry (up to 80%). However, most of these relationships are not  
26 reported when communicating health-related information. Also, there is evidence of a potential  
27 association between COI and the content of posting. We did not find studies on the reporting of  
28 funding sources of studies cited in health messages on social media.  
29  
30  
31

32 These findings are of high importance with the increasing reliance of patients and the public on  
33 social media as a source of information and medical advice. Furthermore, there is evidence that  
34 the use of social media increases significantly during natural hazard and crises. [31]. This is  
35 particularly relevant to the COVID-19 information shared with the public on novel therapeutic  
36 agents which may have harmful side effects [32].  
37  
38  
39  
40  
41

### 42 **Strengths and limitations**

43 To the best of our knowledge, this is the first systematic survey about conflicts of interest and  
44 funding in social media. We have applied standard methodology based on the principles of  
45 conducting systematic surveys (including a comprehensive search, duplicate screening, data  
46 abstraction and quality appraisal).  
47  
48  
49

50 Unfortunately, a limited number of studies have addressed the topic of reporting of conflicts of  
51 interest in social media, and none has explored the reporting of funding of studies cited in health  
52 messages on social media. In addition, the included studies were heterogeneous in terms of study  
53 designs and outcomes reported, which prevented us from conducting a more advanced synthesis.  
54  
55  
56  
57  
58  
59  
60

1  
2  
3 Two of the included studies found an association between COI and the content of social media  
4 posting. However, it is not clear whether the relationship is causal, i.e., having it is the COI that  
5 leads to a specific point of view.  
6  
7  
8  
9

### 10 **Implications for practice and research**

11  
12 Reporting conflict of interest and funding on social media is a basic requirement for the responsible  
13 use of social media during, particularly during crises associated with “infodemics”, such as the  
14 COVID-19 pandemic [33]. Clear guidance and policies are needed for the reporting of COI and  
15 funding by health care professionals when using social media. In addition, improving media  
16 literacy is essential to ensure the public is aware of the potential role of COI and funding, and the  
17 importance of their reporting in the context of social media.  
18  
19

20  
21 Future research should explore the impact of COI in social media on the perceptions, beliefs, and  
22 behaviors of their users. Despite the extent of misinformation, and disinformation on social media  
23 during the COVID-19 pandemic [34], no study has assessed the prevalence of COI in that context.  
24 Interestingly, one study found a correlation between the amounts received by academic infectious  
25 diseases physicians from Gilead Sciences, producer of remdesivir, and their public opposition to  
26 the use of hydroxychloroquine [35]. Therefore, it would be important to explore the prevalence of  
27 COI in that context and the relationship between COI, misinformation, and disinformation. From  
28 a methodological point of view, future studies should clearly distinguish between the absence of a  
29 COI statement and a statement of absence of COI.  
30  
31  
32  
33  
34  
35  
36  
37  
38  
39  
40  
41  
42  
43  
44  
45  
46  
47  
48  
49  
50  
51  
52  
53  
54  
55  
56  
57  
58  
59  
60

## DECLERATIONS

### Authors Contributions

EAA conceived and designed the study. VH and FM coordinated various parts of the study. EAA had full access to all the data in the study and takes responsibility for the integrity and accuracy of the data analysis. LH, VH and FM designed the search strategy. FM and RAK ran the search and VH later updated it. VH, FM, JK, HN, AM, RAK, DAO, and RH contributed to the study selection process. VH, FM, AM, HN, and JK extracted the data. VH and FM analyzed the data. VH, FM, JK, and EAA interpreted the data. FM wrote the first draft of the manuscript with EAA; VH worked on subsequent drafts with JK and EAA. All authors critically revised the manuscript and approved the final manuscript.

### Ethics and dissemination

This systematic survey did not involve human research participants, and therefore does not require ethical approval.

### Patient Consent

Patient consent is not applicable.

### Transparency

EAA affirms that this manuscript is an honest, accurate, and transparent account of the study being reported, that no important aspects of the study have been omitted and that any discrepancies from the planned study have been explained.

### Funding

This research received no specific grant from any funding agency in the public, commercial or not-for-profit sectors.

### Conflict of interest

EAA and JK have conducted studies on the topics of conflicts of interest and funding.

### Data availability statement

All data relevant to the study are included in the article or uploaded as supplementary information.

## SUPPLEMENTARY MATERIAL

**Supplementary file 1:** Systemic survey protocol.

**Supplementary file 2:** Search strategies used in Medline(OVID), Embase and Google Scholar.

**Supplementary file 3:** PRISMA flow diagram for systematic reviews.

**Supplementary file 4:** Excluded studies in full-text screening with their corresponding reasons of exclusion.

**Supplementary file 5:** Characteristics of the 17 included studies.

**Supplementary file 6:** Appraisal of the 17 included studies using Mixed Methods Appraisal Tool.

## ABBREVIATIONS

COI: conflicts of interest

PRISMA: Preferred Reporting Items for Systematic Reviews and Meta-Analyses

COVID-19: Corona Virus Disease 2019

OPD: Open Payment Database

## REFERENCES

1. Omurtag K, Turek P. Incorporating social media into practice: A blueprint for reproductive health providers. *Clinical Obstetrics and Gynecology*. 2013;56(3):463-70.
2. Kaplan AM, Haenlein M. Users of the world, unite! The challenges and opportunities of Social Media. *Business horizons*. 2010;53(1):59-68.
3. TenBarge AM, Riggins JL. Responding to Unsolicited Medical Requests from Health Care Professionals on Pharmaceutical Industry-Owned Social Media Sites: Three Pilot Studies. *Journal of medical Internet research*. 2018;20(10):e285-e.
4. McCarthy CP, DeCamp M, McEvoy JW. Social Media and Physician Conflict of Interest. *American Journal of Medicine*. 2018;131(8):859-60.
5. Akl EA, Hakoum M, Khamis A, et al. A framework is proposed for defining, categorizing, and assessing conflicts of interest in health research. *Journal of clinical epidemiology*. 2022.
6. Borgmann H, Cooperberg M, Murphy D, et al. Online Professionalism—2018 Update of European Association of Urology (@Uroweb) Recommendations on the Appropriate Use of Social Media. *European urology*. 2018;74(5):644-50.
7. Farnan JM, Sulmasy LS, Worster BK, et al. Online medical professionalism: Patient and public relationships: Policy statement from the American College of physicians and the federation of State Medical Boards. *Annals of internal medicine*. 2013;158(8):620-7.
8. Shore R, Halsey J, Shah K, et al. Report of the AMA council on ethical and judicial affairs: Professionalism in the use of social media. *The Journal of clinical ethics*. 2011;22(2):165-72.
9. Greysen SR, Chretien KC, Kind T, et al. Physician violations of online professionalism and disciplinary actions: a national survey of state medical boards. *Jama*. 2012;307(11):1141-2.
10. Zhang MW, Ho RC, Loh A, et al. Current status of postnatal depression smartphone applications available on application stores: an information quality analysis. *BMJ Open*. 2017;7(11):e015655.
11. Miller EA, Pole A, Bateman C. Variation in Health Blog Features and Elements by Gender, Occupation, and Perspective. *Journal of health communication*. 2011;16(7):726-49.
12. Toth J, O'Connor C, Hartman B, et al. "Detoxify or Die": Qualitative Assessments of Ontario Nutritionists' and Dietitians' Blog Posts Related to Detoxification Diets. *Canadian journal of dietetic practice and research*. 2019;80(3):116-21.
13. Wagner L, Paquin R, Persky S. Genetics blogs as a public health tool: Assessing credibility and influence. *Public Health Genomics*. 2012;15(3-4):218-25.
14. Helou V, Mouzahem F, Makarem A, et al. Conflict of interest and funding in health communication on social media: a systematic review. 2022.
15. Page MJ, McKenzie JE, Bossuyt PM, et al. The PRISMA 2020 statement: An updated guideline for reporting systematic reviews. *Journal of clinical epidemiology*. 2021;134:178-89.
16. Hong QN, Fàbregues S, Bartlett G, et al. The Mixed Methods Appraisal Tool (MMAT) Version 2018 for Information Professionals and Researchers. *Education for information*. 2018;34(4):285-91.
17. Niforatos JD, Lin L, Narang J, et al. Financial Conflicts of Interest Among Emergency Medicine Contributors on Free Open Access Medical Education (FOAMed). *Academic emergency medicine*. 2019;26(7):814-7.
18. Tao DL, Boothby A, McLouth J, et al. Financial Conflicts of Interest Among Hematologist-Oncologists on Twitter. *JAMA internal medicine*. 2017;177(3):425-7.

19. Walradt T, Bilal M, Wadhwa V, et al. Confidentiality and Conflicts of Interest: An Assessment of Twitter Posts in Gastrointestinal Endoscopy. *The American journal of gastroenterology*. 2021;116(7):1542-4.
20. Chretien KC, Azar J, Kind T. Physicians on Twitter. *JAMA : the journal of the American Medical Association*. 2011;305(6):566-8.
21. Betschart P, Pratsinis M, Müllhaupt G, et al. Information on surgical treatment of benign prostatic hyperplasia on YouTube is highly biased and misleading. *BJU international*. 2020;125(4):595-601.
22. Lagu T. *Content of weblogs written by health professionals*. New York: Aspen Publishers, Inc; 2008. p. 4.
23. Nishizaki N, Hirano D, Oishi K, et al. YouTube videos in Japanese as a source of information on nocturnal enuresis: a content-quality and reliability analysis. *Pediatrics international*. 2021;64(1):e15049-e.
24. Pratsinis M, Abt D, Müllhaupt G, et al. Systematic assessment of information about surgical urinary stone treatment on YouTube. *World journal of urology*. 2021;39(3):935-42.
25. Pratsinis M, Babst C, Langenauer J, et al. Qualitative Assessment of Medical Information on YouTube: A Multilingual Comparison of Common Urological Conditions. *Urologia internationalis*. 2021;105(9-10):757-63.
26. Vu E, Pratsinis M, Plasswilm L, et al. Radiotherapy or surgery? Comparative, qualitative assessment of online patient education materials on prostate cancer. *Current oncology (Toronto)*. 2021;28(5):3420-9.
27. Shrank WH, Choudhry NK, Swanton K, et al. Variations in Structure and Content of Online Social Networks for Patients With Diabetes. *Archives of internal medicine (1960)*. 2011;171(17):1589-91.
28. Kaestner V, Brown A, Tao D, et al. Conflicts of interest in Twitter. *The Lancet Haematology*. 2017;4(9):e408-e9.
29. Chretien KC, Greysen SR, Chretien J-P, et al. Online Posting of Unprofessional Content by Medical Students. *JAMA : the journal of the American Medical Association*. 2009;302(12):1309-15.
30. Hessari NM, van Schalkwyk MCI, Thomas S, et al. Alcohol industry CSR organisations: What can their twitter activity tell us about their independence and their priorities? a comparative analysis. *International journal of environmental research and public health*. 2019;16(5):892.
31. Niles MT, Emery BF, Reagan AJ, et al. Social media usage patterns during natural hazards. *PloS one*. 2019;14(2):e0210484-e.
32. Gottlieb M, Dyer S, Courtney DM. Information and Disinformation: Social Media in the COVID-19 Crisis. *Academic emergency medicine*. 2020;27(7):640-1.
33. González-Padilla DA, Tortolero-Blanco L. Social media influence in the COVID-19 Pandemic. *International Brazilian journal of urology*. 2020;46(suppl 1):120-4.
34. Deruelle F. The pharmaceutical industry is dangerous to health. Further proof with COVID-19. *Surgical neurology international*. 2022;13:475.
35. Roussel Y, Raoult D. Influence of conflicts of interest on public positions in the COVID-19 era, the case of Gilead Sciences. *New microbes and new infections*. 2020;38:100710-.



**Supplemental file 1:** Systematic survey protocol

**Title: Conflict of interest and funding in health communication on social media: a systematic survey**

Vanessa Helou<sup>1</sup>, Fatima Mouzahem<sup>2</sup>, Adham Makarem<sup>1,3</sup>, Hussein A. Noureldine<sup>4</sup>, Rayane Al Khoury<sup>5,6</sup>, Dana Al Oweini<sup>1</sup>, Razan Halak<sup>1</sup>, Layal Hneiny<sup>7</sup>, Joanne Khabsa<sup>5</sup>, Elie A. Akl<sup>8,9</sup>

<sup>1</sup>Faculty of Medicine, American University of Beirut, Beirut, Lebanon

<sup>2</sup>Faculty of Health Sciences, American University of Beirut, Beirut, Lebanon

<sup>3</sup>School of Public Health, Boston University, Boston, Massachusetts, USA

<sup>4</sup>LAU Gilbert and Rose-Marie Chaghoury School of Medicine, Lebanese American University, Byblos, Lebanon

<sup>5</sup>Clinical Research Institute, American University of Beirut Medical Center, Beirut, Lebanon

<sup>6</sup>Infectious Disease Epidemiology Group & World Health Organization Collaborating Centre for Disease Epidemiology Analytics on HIV/AIDS, Sexually Transmitted Infections, and Viral Hepatitis, Weill Cornell Medicine, Doha, Qatar

<sup>7</sup>Wegner Health Sciences Library, University of South Dakota, Sioux Falls, USA & Saab Medical Library, University Libraries, American University of Beirut, Beirut, Lebanon

<sup>8</sup>Department of Health Research Methods, Evidence, and Impact (HEI), McMaster University, Canada

<sup>9</sup>Department of Internal Medicine, American University of Beirut Medical Center, Beirut, Lebanon

**Corresponding author:**

Elie A. Akl, MD, MPH, PhD  
Department of Internal Medicine  
American University of Beirut Medical Center  
P.O. Box: 11-0236  
Riad-El-Solh Beirut 1107 2020  
Beirut – Lebanon  
Phone: 00961 1 374374  
[ea32@aub.edu.lb](mailto:ea32@aub.edu.lb)

**Keywords:** conflict of interest, funding, social media, health, systematic review

**Ethical approval:** The study involves no human subjects and requires no ethical approval.



## BACKGROUND

Social media has reshaped the dissemination of information and medical education. The patient-physician relationship has been transformed with the introduction of social media especially during the COVID-19 pandemic when quarantine and restrictions were applied. Many users rely on the internet to find answers to their medical questions. Health professionals can communicate and share their health-related opinions using posts, videos, or blogs.

Within recent years, the use of social media by physicians and health care professionals has increased significantly with some estimates reporting increases from 42% in 2010 to as high as 90% in 2011 [1]. While 90% of health care professionals use social media platforms for personal purposes, 65% use them for professional reasons such as promotion of health behaviors, discussions of health care policy, communicating with colleagues, and education of patients, peers, and students [2]. However, professionals may have conflicts of interest (COI) that may bias their shared health-related recommendations on their platforms [1].

## STUDY OBJECTIVES

The objective of this study was to synthesize the available evidence on the disclosure of conflicts of interests by individuals posting health messages on social media, and on the reporting of funding sources of studies cited in health messages on social media,

## METHODS

### Design overview and definitions

We will conduct a systematic review to identify studies that addressed reporting of conflict of interest and funding in social media health communications. We will use the following definitions:

- Conflict of interests: “a COI exists when a past, current, or expected interest creates a significant risk of inappropriately influencing an individual’s judgment, decision, or action when carrying out a specific duty” [3].
- Declaration statement: any statement reporting a COI of a named individual, whether indicating the absence of COI or presence of a specific COI and describing it.

## Eligibility criteria

We will include articles that meet the following eligibility criteria:

- Topic: conflict of interest on social media or funding;
- Type of social media: we will include all social media platforms that fit the Web 2.0 definition. This includes blogs, and social media applications such as Facebook, Instagram, Twitter, LinkedIn, and YouTube. We will exclude studies that involved traditional media channels (Web 1.0) such as newspapers, radio, TV, emails, and websites;
- Field: health field, including clinical, health systems and policy, public health and biomedical sciences;
- Study design: any primary study including surveys, research letters, and qualitative studies. We will exclude editorials, abstracts, letters to the editor, reviews and opinion pieces;
- Date of publication: 2005 to current, with 2005 being the year of the rise of Web 2.0;
- Language: any language.

## Search strategy

We developed a search strategy, using the help of a librarian, for MEDLINE, EMBASE and Google Scholar electronic databases from 2005 to present. The search combined various keywords and medical subject headings (MeSH) terms relevant to concepts of conflict of interest, funding, and social media. We did not restrict the search to specific languages. We will also screen the reference lists of included studies as well as other relevant papers.

## Article selection

Teams of two reviewers will assess in duplicate and independently the titles and abstracts of citations identified by the search for potential eligibility using Rayyan screening tool. We will retrieve the full texts of citations judged as potentially eligible by at least one reviewer. Reviewers subsequently will screen in duplicate and independently the full texts using Rayyan screening tool. They will resolve any disagreements by discussion or with the help of a third reviewer when consensus cannot be reached. We will use standardized and pilot-tested screening tools. We will record the reasons for exclusion and summarize the results of the

1  
2  
3 selection process using the 2020 PRISMA flow diagram. The reviewers will conduct  
4 calibration exercises before the screening process.  
5  
6  
7

## 8 **Data abstraction**

9

10  
11 The reviewers will abstract data from eligible studies in duplicate and independently. We will  
12 use a standardized and pilot-tested data abstraction form. Disagreements will be resolved  
13 through discussion or with the help of a third reviewer (EAA). We will conduct a calibration  
14 exercise to enhance the validity of the process. Study authors will be contacted for any  
15 clarification.  
16  
17

18  
19 We will abstract the following variables from each included study:  
20

### 21 1. General characteristics of the study:

- 22 • Population (e.g., type of healthcare professionals: physicians, nurses, or other);
- 23 • Year of conduct;
- 24 • Study design;
- 25 • Funding of the study;
- 26 • COI of study authors
- 27 • Country of study authors

### 28 2. Social media:

- 29 • Type of social media (e.g., Facebook, twitter, Instagram, YouTube, LinkedIn ...);
- 30 • Number of posts, videos or blogs assessed;
- 31 • Language of posts, videos or blogs
- 32 • Country of the subjects of study
- 33 • Topic focus of the study, if any.

### 34 3. Conflict of interest:

- 35 • Type of conflict of interest
- 36 • Subject of conflict of interest
- 37 • Source of conflict of interest
- 38 • Tools used to assess the presence of financial relationships
- 39 • Prevalence of conflict of interest
- 40 • Frequency of reporting of conflict of interest

- Proportion of undisclosed conflict of interest
- Unprofessional incidents involving conflict of interest

#### 4. Funding:

- Type of funding
- Source of funding
- Frequency of reporting of funding

### **Quality assessment**

A team of two reviewers will assess independently the risk of bias of included studies using Mixed Methods Appraisal Tool (MMAT). This tool is designed for the appraisal stage of systematic reviews that include qualitative, quantitative or mixed methods studies [4]. We expect most of the studies to be cross-sectional and these will be assessed using the relevant part of the tool.

### **Data synthesis**

Due to the nature of the data, we will report the results in narrative and tabular formats.

**REFERENCES**

1. McCarthy CP, DeCamp M, McEvoy JW. Social Media and Physician Conflict of Interest. *American Journal of Medicine*. 2018;131(8):859-60.
2. TenBarge AM, Riggins JL. Responding to Unsolicited Medical Requests from Health Care Professionals on Pharmaceutical Industry-Owned Social Media Sites: Three Pilot Studies. *Journal of medical Internet research*. 2018;20(10):e285-e.
3. Akl EA, Hakoum M, Khamis A, et al. A framework is proposed for defining, categorizing, and assessing conflicts of interest in health research. *Journal of clinical epidemiology*. 2022.
4. Hong QN, Fàbregues S, Bartlett G, et al. The Mixed Methods Appraisal Tool (MMAT) Version 2018 for Information Professionals and Researchers. *Education for information*. 2018;34(4):285-91.

**Supplementary file 2: Search strategies used in Medline(OVID), Embase and Google Scholar**

**Medline Search Strategy**

Database: Ovid MEDLINE(R) and Epub Ahead of Print, In-Process & Other Non-Indexed Citations and Daily <1946 to February 15, 2019>

Search Strategy:

-----

1 "Conflict of Interest"/ (9255)  
 2 ((competing or conflict\*) adj3 (interest? or influence? or relationship?)).mp. (18489)  
 3 financial support/ or research support as topic/ (25591)  
 4 (((financ\* or monetary or industr\* or pharmaceutical\*) adj3 (fund\* or pay\* or paid or  
 5 support or contributi\* or compensat\* or sponsor\* or backing or (kick adj back\*) or incentive?  
 6 or re?imburse\* or subsidi\* or award\* or endow\* or tie? or link\* or associat\* or affiliation? or  
 7 relation\* or grant\*)) or disclos\*).mp. (120953)  
 8 Disclosure/ (12719)  
 9 Gift Giving/ (1521)  
 10 ((financ\* or gift? or gift-giving) adj3 (disclos\* or report\* or declar\* or reveal\* or receiv\*  
 11 or giv\* or gave or accept\* or award\* or admit\*)).mp. [mp=title, abstract, original title, name  
 12 of substance word, subject heading word, floating sub-heading word, keyword heading word,  
 13 organism supplementary concept word, protocol supplementary concept word, rare disease  
 14 supplementary concept word, unique identifier, synonyms] (7487)  
 15 or/1-7 (158539)  
 16 exp Mass Media/ (44039)  
 17 (mass adj2 (media? or medium or communication?)).mp. (16758)  
 18 (columnist? or reporter? or correspondent? or commentator? or reviewer?).mp.  
 19 (145928)  
 20 Social Media/ (5474)  
 21 (((social or digital) adj2 (medium or media\* or network\* or net-work\* or bookmark\* or  
 22 book-mark\* or application? or debate\* or channel\* or communication? or collaborat\*)) or  
 23 (institution\* adj reposit\*)).mp. (35361)  
 24 Blogging/ (903)  
 25 (blog\* or microblog\* or micro-blog\* or weblog\*).mp. (2308)  
 26 (tout or wordpress or yammer or citeulike or zotero or evernote or delicious or Digg or  
 27 picasa or youtube or Vimeo or reddit or snapchat or mendeley).mp. (3525)  
 28 exp Social Networking/ (2487)  
 29 (facebook or twitter or tweet\* or LinkedIn or pinterest).mp. (5334)  
 30 ((Google adj plus) or google?+).mp. (15664)  
 31 (Tumblr or Instagram or mspace or researchgate or academia or figshare or  
 32 mendeley).mp. (7153)  
 33 Webcasts as Topic/ (301)  
 34 (podcast\* or pod-cast\* or webcast\* or web-cast\*).mp. (1687)  
 35 (rss adj2 feed\*).mp. (49)  
 36 (weibo or flickr).mp. (171)  
 37 ((virtual or video\* or content? or project? or audio or digital or online or forum? or  
 38 web) adj2 (world? or reality or place? or communit\* or communicat\* or collaborat\* or  
 39 shar\*)).mp. (23762)  
 40 (web adj2 application\*).mp. (2856)  
 41 ((user adj generated) or usergenerated).mp. (359)

1  
2  
3 28 (wikipedia or wiki\* or "web 2.0").mp. (1786)  
4 29 ((knowledge or internet or (electronic adj mail) or email or e-mail or health or listserv\*)  
5 adj2 (share\* or communicat\* or sharing? or collaborat\*).mp. (15600)  
6 30 or/9-29 (296669)  
7 31 8 and 30 (4486)  
8 32 limit 31 to yr="2005 -Current" (3436)  
9

10 \*\*\*\*\*  
11  
12  
13  
14  
15  
16  
17  
18  
19  
20  
21  
22  
23  
24  
25  
26  
27  
28  
29  
30  
31  
32  
33  
34  
35  
36  
37  
38  
39  
40  
41  
42  
43  
44  
45  
46  
47  
48  
49  
50  
51  
52  
53  
54  
55  
56  
57  
58  
59  
60

For peer review only

## EMBASE Search Strategy

#33 #32 AND (2005:py OR 2006:py OR 2007:py OR 2008:py OR 2010:py OR 2011:py OR 2012:py OR 2013:py OR 2014:py OR 2015:py OR 2016:py OR 2017:py OR 2018:py OR 2019:py OR 2020:py OR 2021:py OR 2022:py) **5551**

#32 #31

#31 #9 AND #30 **6193**

#30 #10 OR #11 OR #12 OR #13 OR #14 OR #15 OR #16 OR #17 OR #18 OR #19 OR #20 OR #21 OR #22 OR #23 OR #24 OR #25 OR #26 OR #27 OR #28 OR #29 **334472**

#29 (knowledge OR internet OR electronic) NEAR/2 (mail OR email OR 'e mail' OR health OR listserv\*) NEAR/2 (share\* OR communicat\* OR sharing\* OR collaborat\*) **2485**

#28 wikipedia OR wiki\* OR 'web 2.0' **2900**

#27 (user NEXT/1 generated) OR usergenerated **407**

#26 web NEAR/2 application\* **3670**

#25 (virtual OR video\* OR content\* OR project\* OR audio OR digital OR online OR forum\* OR web) NEAR/2 (world\* OR reality OR place\* OR communit\* OR communicat\* OR collaborat\* OR shar\*) **44943**

#24 weibo OR flickr **1657**

#23 rss NEAR/2 feed\* **72**

#22 podcast\* OR 'pod cast\*' OR webcast\* OR 'web cast\*' **1687**

#21 'webcast'/de **310**

#20 tumblr OR instagram OR myspace OR researchgate OR academia OR figshare OR Mendeley **41870**

#19 (google NEXT/1 plus) OR google?+ **63**

#18 facebook OR twitter OR tweet\* OR linkedin OR pinterest **7561**

#17 'social network'/exp **13447**

#16 tout OR wordpress OR yammer OR citeulike OR zotero OR evernote OR delicious OR digg OR picasa OR youtube OR vimeo OR reddit OR snapchat **4608**

#15 blog\* OR microblog\* OR 'micro blog\*' OR weblog\* **3710**

#14 'blogging'/de **260**

#13 ((social OR digital) NEAR/2 (medium OR media\* OR network\* OR 'net work\*' OR bookmark\* OR 'book mark\*' OR application? OR debate\* OR channel\* OR communication? OR collaborat\*)) OR (institution\* NEAR/2 repositor\*) **44828**

#12 'social media'/de **13939**



1  
2  
3 #11 columnist\* OR reporter\* OR correspondent\* OR commentator\* OR reviewer\* **172962**

4 #10 'mass medium'/exp **17396**

5  
6 #9 #1 OR #2 OR #3 OR #4 OR #5 OR #6 OR #7 OR #8 **224956**

7  
8 #8 (financ\* OR gift\* OR 'gift giving') NEAR/3 (disclos\* OR report\* OR declar\* OR  
9 reveal\* OR receiv\* OR giv\* OR gave OR accept\* OR award\* OR admit\*) **10745**

10  
11 #7 'gift giving'/de **1086**

12  
13 #6 disclos\* **89957**

14  
15 #5 (financ\* OR monetary OR industr\* OR pharmaceutical\*) NEAR/3 (fund\* OR pay\* OR  
16 paid OR support OR contributi\* OR compensat\* OR sponsor\* OR backing OR 'kick back'  
17 OR incentive\* OR re\*imburse\* OR subsidi\* OR award\* OR endow\* OR disclos\* OR tie  
18 OR ties OR link\* OR associat\* OR affiliat\* OR relation\* OR grant\*) **80180**

19  
20 #4 research NEAR/1 support **6650**

21  
22 #3 'funding'/de **37321**

23  
24 #2 (competing OR conlict\*) NEAR/3 (interest\* OR influence\* OR relationship\*) **22710**

25  
26 #1 'conflict of interest'/exp **11111**

27  
28 .....

**Google Scholar**

("Conflict of Interest" OR "Conflict of Interests" OR "Competing Interest" OR "Competing Interests" OR "financial support" OR "financial declaration") AND (Facebook OR Instagram OR twitter OR tweet OR Pinterest OR LinkedIn OR fig share OR Mendeley OR Snapchat OR "social media")

Picked: 200 articles

For peer review only

## Supplementary file 3: PRISMA 2020 flow diagram for systematic reviews

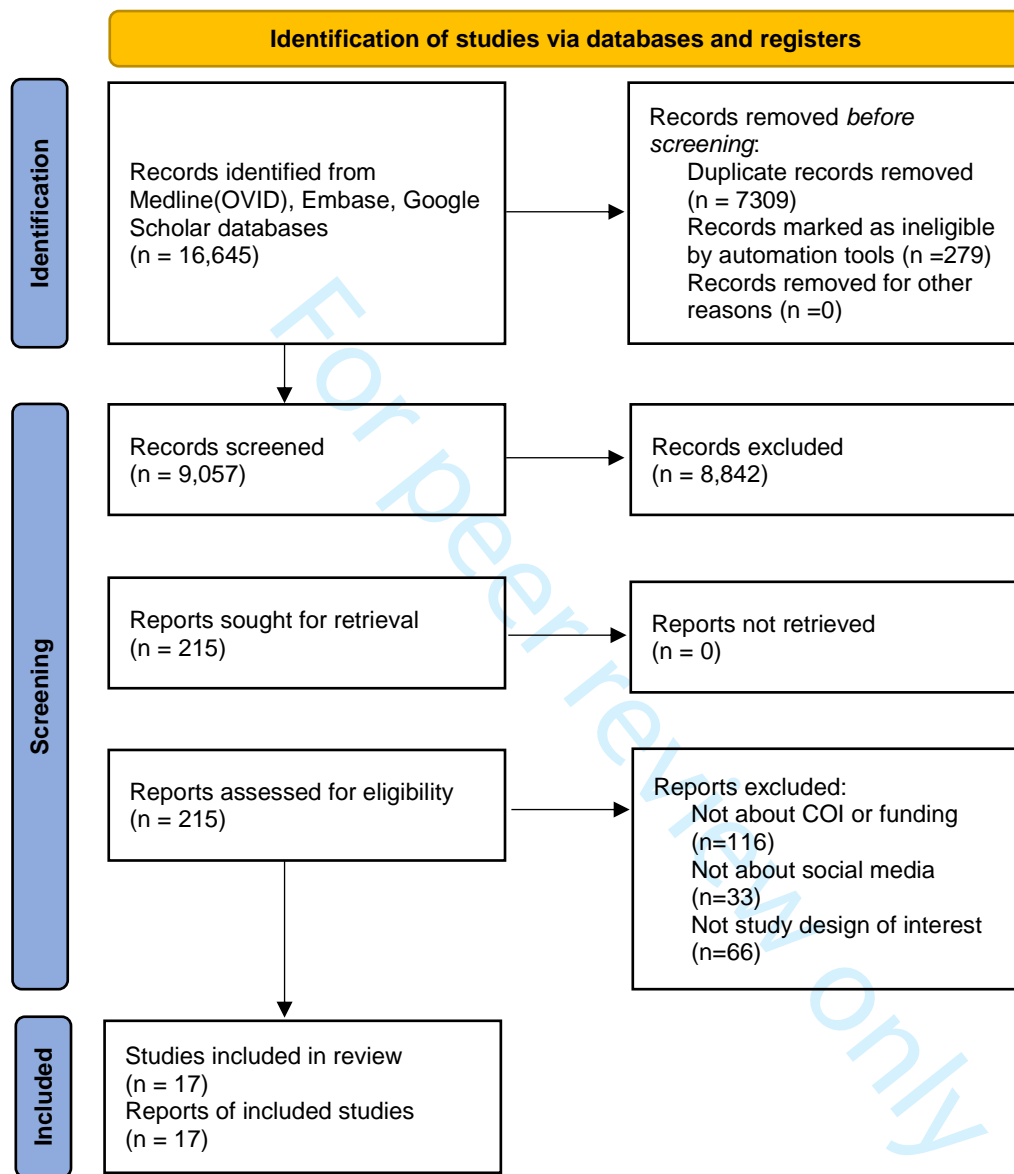

From: Page MJ, McKenzie JE, Bossuyt PM, Boutron I, Hoffmann TC, Mulrow CD, et al. The PRISMA 2020 statement: an updated guideline for reporting systematic reviews. *BMJ* 2021;372:n71. doi: 10.1136/bmj.n71

**Supplementary File 4:** Excluded studies in full-text screening with their corresponding reason of exclusion.

| <b>Author/Journal, year</b> | <b>Reason of exclusion</b>   |
|-----------------------------|------------------------------|
| Aase 2010 [1]               | Not study design of interest |
| Abdel-Wahab 2019 [2]        | Not about COI                |
| Aboujaoude 2019 [3]         | Not about COI                |
| Addiction 2011 [4]          | Not about social media       |
| Ahc 2019 [5]                | Not about social media       |
| AIDS alert 2011 [6]         | Not about social media       |
| Aiken 2012 [7]              | Not about COI                |
| Al-Balushi 2020 [8]         | Not study design of interest |
| Alshaikh 2019 [9]           | Not about social media       |
| Anderson 2010 [10]          | Not about COI                |
| Anderson 2010 [10]          | Not study design of interest |
| Anderson 2013 [11]          | Not about COI                |
| Apperson 2019 [12]          | Not about COI                |
| Au 2021 [13]                | Not study design of interest |
| Azizi 2013 [14]             | Not about COI                |
| Back letter 2008 [15]       | Not about social media       |
| Back letter 2008 [16]       | Not about social media       |
| Baier 2019 [17]             | Not about COI                |
| Bamat 2018 [18]             | Not study design of interest |
| Barber 2020 [19]            | Not about social media       |
| Barreda 2015 [20]           | Not about COI                |
| Baxter 2009 [21]            | Not study design of interest |
| Bayne 2017 [22]             | Not about COI                |
| Bechini 2021 [23]           | Not about social media       |
| Becker 2015 [24]            | Not about social media       |
| Bertholf 2021 [25]          | Not study design of interest |
| Bhat 2019 [26]              | Not study design of interest |
| Bibault 2017 [27]           | Not study design of interest |
| Blastl 2020 [28]            | Not study design of interest |
| Bosslet 2011 [29]           | Not about COI                |
| Braccia 2009 [30]           | Not about COI                |
| Braillon 2018 [31]          | Not study design of interest |
| Braunstein 2012 [32]        | Not about COI                |
| Bredenoord 2017 [33]        | Not about COI                |
| Bukhari 2021 [34]           | Not about social media       |
| Bullock 2014 [35]           | Not about COI                |
| Cain 2010 [36]              | Not about COI                |
| Capel 2019 [37]             | Not about COI                |
| Carson 2018 [38]            | Not about COI                |
| Casigliani 2020 [39]        | Not study design of interest |
| Casswell 2018 [40]          | Not about social media       |

|    |                            |                              |
|----|----------------------------|------------------------------|
| 1  |                            |                              |
| 2  |                            |                              |
| 3  |                            |                              |
| 4  | Chan 2012 [41]             | Not study design of interest |
| 5  | Chretien 2013 [42]         | Not study design of interest |
| 6  | Coutts 2018 [43]           | Not about social media       |
| 7  | Cunningham 2014 [44]       | Not about COI                |
| 8  | Dainton 2009 [45]          | Not about COI                |
| 9  | De Ambrogi 2019 [46]       | Not study design of interest |
| 10 | DeCamp 2012 [47]           | Not study design of interest |
| 11 | DeCamp 2013 [48]           | Not study design of interest |
| 12 | DeCamp 2013 [49]           | Not study design of interest |
| 13 | DeChello 2012 [50]         | Not study design of interest |
| 14 | Denecke 2014 [51]          | Not study design of interest |
| 15 |                            |                              |
| 16 | Dolgin 2019 [52]           | Not about social media       |
| 17 | Douglas 2020 [53]          | Not study design of interest |
| 18 | Drone 2015 [54]            | Not about COI                |
| 19 | Dugdale 2021 [55]          | Not study design of interest |
| 20 |                            |                              |
| 21 | ED management 2005 [56]    | Not about COI                |
| 22 | Englund 2012 [57]          | Not about COI                |
| 23 | Essary 2011 [58]           | Not about COI                |
| 24 |                            |                              |
| 25 | Failli 2021 [59]           | Not about social media       |
| 26 | Faloon 2006 [60]           | Not about COI                |
| 27 |                            |                              |
| 28 | Farrelly 2014 [61]         | Not about COI                |
| 29 | Fattore 2019 [62]          | Not about COI                |
| 30 | Fontanarosa 2019 [63]      | Not about social media       |
| 31 | For the Record 2011 [64]   | Not study design of interest |
| 32 | For the record 2013 [65]   | Not study design of interest |
| 33 |                            |                              |
| 34 | Frankish 2012 [66]         | Not about COI                |
| 35 | Galbraith 2014 [67]        | Not about COI                |
| 36 | Gifford 2021 [68]          | Not study design of interest |
| 37 | Gilligan 2019 [69]         | Not study design of interest |
| 38 | Gordon 2010 [70]           | Not about COI                |
| 39 | Gottlieb 2020 [71]         | Not study design of interest |
| 40 |                            |                              |
| 41 | Grace 2021 [72]            | Not about COI                |
| 42 | Grummer-Strawn 2019 [73]   | Not about social media       |
| 43 | Guo 2020 [74]              | Not study design of interest |
| 44 | Gupta 2020 [75]            | Not study design of interest |
| 45 | Haddas 2021 [76]           | Not study design of interest |
| 46 |                            |                              |
| 47 | Halдар 2010 [77]           | Not about COI                |
| 48 | Hampton 2005 [78]          | Not about social media       |
| 49 | Hanley 2012 [79]           | Not about COI                |
| 50 | Harris 2012 [80]           | Not about COI                |
| 51 |                            |                              |
| 52 | Henderson 2014 [81]        | Not about COI                |
| 53 | Henderson 2020 [82]        | Not about COI                |
| 54 | Henry 2014 [83]            | Not about COI                |
| 55 | Hernandez-Aguado 2020 [84] | Not about COI                |
| 56 |                            |                              |
| 57 |                            |                              |
| 58 |                            |                              |
| 59 |                            |                              |
| 60 |                            |                              |

|                                               |                              |
|-----------------------------------------------|------------------------------|
| Hessari 2019 [85]                             | Not study design of interest |
| Hetzler 2020 [86]                             | Not about COI                |
| Holden 2017 [87]                              | Not about COI                |
| Huby 2016 [88]                                | Not about COI                |
| Hwang 2016 [89]                               | Not health field             |
| Hwong 2014 [90]                               | Not study design of interest |
| Islam 2019 [91]                               | Not study design of interest |
| Jiang 2017 [92]                               | Not about COI                |
| Jones 2021 [93]                               | Not about COI                |
| Joshi 2020 [94]                               | Not study design of interest |
| Journal of Instructional Psychology 2012 [95] | Not about COI                |
| Journal of Korean medical science 2015 [96]   | Not about COI                |
| Katz 2014 [97]                                | Not about COI                |
| Kh 2009 [98]                                  | Not about social media       |
| Kirschner 2013 [99]                           | Not study design of interest |
| Kleebauer 2014 [100]                          | Not about COI                |
| Knoepfler 2016 [101]                          | Not about COI                |
| Knopf 2018 [102]                              | Not about COI                |
| Korman 2021 [103]                             | Not about social media       |
| Kullgren 2014 [104]                           | Not about COI                |
| Kunze 2020 [105]                              | Not about COI                |
| Lachman 2013 [106]                            | Not about COI                |
| Lackner 2012 [107]                            | Not about social media       |
| Lagu 2011 [108]                               | Not about COI                |
| Layng 2012 [109]                              | Not about COI                |
| Lazard 2020 [110]                             | Not about COI                |
| Lee 2016 [111]                                | Not health field             |
| Lee 2020 [112]                                | Not about COI                |
| Lerner 2013 [113]                             | Not about COI                |
| Lin 2016 [114]                                | Not about COI                |
| Lusis 2009 [115]                              | Not about COI                |
| Macauley 2021 [116]                           | Not study design of interest |
| MacWilliam 2006 [117]                         | Not study design of interest |
| Mansfield 2011 [118]                          | Not about COI                |
| Margaret 2019 [119]                           | Not about COI                |
| Mayes 2018 [120]                              | Not about social media       |
| McCarthy 2018 [121]                           | Not study design of interest |
| McComas 2008 [122]                            | Not about COI                |
| McCullough 2010 [123]                         | Not about COI                |
| Medical marketing 2016 [124]                  | Not study design of interest |
| Militello 2021 [125]                          | Not study design of interest |
| Milton 2014 [126]                             | Not about COI                |
| Milton 2016 [127]                             | Not about COI                |
| Milton 2018 [128]                             | Not about COI                |
| Minhas 2006 [129]                             | Not study design of interest |

|    |                                  |                              |
|----|----------------------------------|------------------------------|
| 1  |                                  |                              |
| 2  |                                  |                              |
| 3  |                                  |                              |
| 4  | Modern Healthcare 2017 [130]     | Not about COI                |
| 5  | Moodley 2013 [131]               | Not about COI                |
| 6  | Moses 2014 [132]                 | Not about COI                |
| 7  | Moukarzel 2021 [133]             | Not study design of interest |
| 8  | Murakami 2019 [134]              | Not about COI                |
| 9  | Muzumdar 2021 [135]              | Not study design of interest |
| 10 | Naeem 2021 [136]                 | Not about COI                |
| 11 | Nau 2017 [137]                   | Not about COI                |
| 12 | Neuer 2019 [138]                 | Not about social media       |
| 13 | Neville 2015 [139]               | Not about COI                |
| 14 | Neville 2016 [140]               | Not about COI                |
| 15 | Nursing ethics 2015 [141]        | Not study design of interest |
| 16 | Nursing standard 2016 [142]      | Not study design of interest |
| 17 | Nursing times 2011 [143]         | Not study design of interest |
| 18 | O'Glasser 2020 [144]             | Not study design of interest |
| 19 | O'Hanlon 2011 [145]              | Not about COI                |
| 20 | O'Keeffe 2019 [146]              | Not study design of interest |
| 21 | O'Rourke 2015 [147]              | Not about COI                |
| 22 | Oncology 2012 [148]              | Not about COI                |
| 23 | Ong 2021 [149]                   | Not study design of interest |
| 24 | OR Manager 2009 [150]            | Not about COI                |
| 25 | Oransky 2006 [151]               | Not study design of interest |
| 26 | Ornstein 2011 [152]              | Not about social media       |
| 27 | Padeiro 2021 [153]               | Not about COI                |
| 28 | Pagoto 2019 [154]                | Not about COI                |
| 29 | Parasidis 2019 [155]             | Not about COI                |
| 30 | Paterson 2019 [156]              | Not study design of interest |
| 31 | Peltier 2012 [157]               | Not about social media       |
| 32 | Pelton 2012 [158]                | Not about COI                |
| 33 | Pierce 2019 [159]                | Not about COI                |
| 34 | Prasad 2018 [160]                | Not study design of interest |
| 35 | Prateek 2018 [161]               | Not about COI                |
| 36 | Ragan 2012 [162]                 | Not about COI                |
| 37 | Ranpariya 2020 [163]             | Not study design of interest |
| 38 | Ravn 2020 [164]                  | Not about COI                |
| 39 | Rechenberg 2013 [165]            | Not about social media       |
| 40 | Redick 2022 [166]                | Not about social media       |
| 41 | Research Practitioner 2011 [167] | Not about social media       |
| 42 | Roucka 2014 [168]                | Not about COI                |
| 43 | Roupret 2014 [169]               | Not about COI                |
| 44 | Samsa 2019 [170]                 | Not about social media       |
| 45 | Santillan-Doherty 2020 [171]     | Not about COI                |
| 46 | Santoro 2015 [172]               | Not about COI                |
| 47 | Santoro 2022 [173]               | Not study design of interest |
| 48 | Sartor 2019 [174]                | Not about social media       |
| 49 |                                  |                              |
| 50 |                                  |                              |
| 51 |                                  |                              |
| 52 |                                  |                              |
| 53 |                                  |                              |
| 54 |                                  |                              |
| 55 |                                  |                              |
| 56 |                                  |                              |
| 57 |                                  |                              |
| 58 |                                  |                              |
| 59 |                                  |                              |
| 60 |                                  |                              |

|    |                               |                              |
|----|-------------------------------|------------------------------|
| 1  |                               |                              |
| 2  |                               |                              |
| 3  | Scruth 2015 [175]             | Not about COI                |
| 4  | Seppey 2017 [176]             | Not about social media       |
| 5  | Sh 2019 [177]                 | Not about COI                |
| 6  | Sharma 2020 [178]             | Not about COI                |
| 7  | Shore 2011 [179]              | Not about COI                |
| 8  | Silva 2018 [180]              | Not about COI                |
| 9  | Sissung 2021 [181]            | Not study design of interest |
| 10 | Slagle 2011 [182]             | Not about social media       |
| 11 | Smyth 2005 [183]              | Not study design of interest |
| 12 | Snyder 2011 [184]             | Not about COI                |
| 13 | Studenic 2019 [185]           | Not about COI                |
| 14 | Swartz 2016 [186]             | Not about COI                |
| 15 | Tanchuco 2020 [187]           | Not about COI                |
| 16 | Technology 2021 [188]         | Not about COI                |
| 17 | Terrasse 2019 [189]           | Not study design of interest |
| 18 | The American nurse 2015 [190] | Not study design of interest |
| 19 | Tulloch 2011 [191]            | Not about COI                |
| 20 | Van Cauwenberghe 2012 [192]   | Not about COI                |
| 21 | Van Eperen 2010 [193]         | Not about COI                |
| 22 | Varghese 2019 [194]           | Not study design of interest |
| 23 | Varghese 2019 [195]           | Not study design of interest |
| 24 | Vogel 2020 [196]              | Not about COI                |
| 25 | Wagner 2012 [197]             | Not study design of interest |
| 26 | Wallen 2013 [198]             | Not about COI                |
| 27 | Wang 2019 [199]               | Not about COI                |
| 28 | Wayant 2018 [200]             | Not about social media       |
| 29 | Weijs 2017 [201]              | Not about COI                |
| 30 | Weijs 2019 [202]              | Not about COI                |
| 31 | Weinstein 2011 [203]          | Not about COI                |
| 32 | Wheelock 2021 [204]           | Not study design of interest |
| 33 | White 2007 [205]              | Not about COI                |
| 34 | Wilkinson 2018 [206]          | Not about COI                |
| 35 | Williams 2011 [207]           | Not about COI                |
| 36 | Wisniewski 2017 [208]         | Not about COI                |
| 37 | Yan 2020 [209]                | Not study design of interest |
| 38 | Yeh 2018 [210]                | Not about COI                |
| 39 | Yeo 2020 [211]                | Not about COI                |
| 40 | Zember 2015 [212]             | Not about COI                |
| 41 | Zenone 2021 [213]             | Not study design of interest |
| 42 | Zhitomirsky 2016 [214]        | Not study design of interest |
| 43 | Zhou 2018 [215]               | Not study design of interest |
| 44 |                               |                              |
| 45 |                               |                              |
| 46 |                               |                              |
| 47 |                               |                              |
| 48 |                               |                              |
| 49 |                               |                              |
| 50 |                               |                              |
| 51 |                               |                              |
| 52 |                               |                              |
| 53 |                               |                              |
| 54 |                               |                              |
| 55 |                               |                              |
| 56 |                               |                              |
| 57 |                               |                              |
| 58 |                               |                              |
| 59 |                               |                              |
| 60 |                               |                              |



## REFERENCES

1. Aase S. Business of dietetics. Toward e-professionalism: thinking through the implications of navigating the digital world. *Journal of the American Dietetic Association*. 2010;110(10):1442-7.
2. Abdel-Wahab N, Rai D, Siddhanamatha H, Dodeja A, Suarez-Almazor ME, Lopez-Olivo MA. A comprehensive scoping review to identify standards for the development of health information resources on the internet. *PLoS ONE*. 2019;14(6).
3. Aboujaoude E. Problematic Internet use two decades later: Apps to wean us off apps. *CNS Spectrums*. 2019;24(4):371-3.
4. News and Notes. *Addiction*. 2011;106(6):1200-3.
5. AHC M. Updated Ethics Manual Addresses Many New Realities in Clinical Practice. *Medical Ethics Advisor*. 2019;35(3):36-.
6. New draft guidance on financial disclosure. *AIDS Alert*. 2011;26(7):81-2.
7. Aiken T. Dodging the landmines in social media. *Imprint*. 2012;59(2):34-5.
8. Al-Balushi AA. In the Era of Social Media: Is it time to establish a code of online ethical conduct for healthcare professionals? *Sultan Qaboos University medical journal*. 2020;20(1):e25-e8.
9. Alshaikh EA, Almedimigh AF, Alruwaili AM, Almajnoni AH, Alhajiahmed A, Almalki TS, et al. Patient-Focused Online Resources for Melanoma: Highly Variable Content and Quality. *Journal of Cancer Education*. 2019;34(4):775-81.
10. Anderson EE. The role of community-based organizations in the recruitment of human subjects: ethical considerations. *American Journal of Bioethics*. 2010;10(3):20-1.
11. Anderson S, Guyton M. Ethics in an Age of Information Seekers: A Survey of Licensed Healthcare Providers about Online Social Networking. *Journal of Technology in Human Services*. 2013;31(2):112-28.
12. Apperson A, Stelfson M, Paige SR, Chaney BH, Don Chaney J, Wang MQ, et al. Facebook groups on chronic obstructive pulmonary disease: Social media content analysis. *International journal of environmental research and public health*. 2019;16(20):3789.
13. Au CH, Ho KKW, Chiu DKW. Stopping healthcare misinformation: The effect of financial incentives and legislation. *Health policy (Amsterdam)*. 2021;125(5):627-33.
14. Azizi T. The issues surrounding social network sites and healthcare professionals. *Journal of perioperative practice*. 2013;23(10):233-6.
15. The mass media and commercially sponsored research: a call for full disclosure. *Back Letter*. 2008;23(11):126-.
16. Websites on pain a minefield of misinformation. *Back Letter*. 2008;23(4):38-.
17. Baier AL. The Ethical Implications of Social Media: Issues and Recommendations For Clinical Practice. *Ethics & Behavior*. 2019;29(5):341-51.
18. Bamat NA, Manley BJ, Harer MW, Rol, D. Social media for pediatric research: what, who, why, and #? *Pediatric Research*. 2018;84(5):597-9.
19. Barber K. Conflict of Interest—Let the Readers Decide. *Journal of cutaneous medicine and surgery*. 2020;24(3):238-9.
20. Barreda AA, Bilgihan A, Nusair K, Okumus F. Generating brand awareness in Online Social Networks. *Computers in Human Behavior*. 2015;50:600-9.
21. Baxter JD. Are we providers or physicians?...*Arch Intern Med*. 2009 May 11;169(9):829-31. *Archives of Internal Medicine*. 2009;169(18):1725-.
22. Bayne CE, Davies BJ. Chipping away at the body politic one study at a time: the case for more 'unprofessional' online content. *BJU International*. 2017;120(5):609-10.
23. Bechini A, Zanella B, Bonito B, Paoli S, Di Pisa G, Moscadelli A, et al. Quality and safety of vaccines manufacturing: An online survey on attitudes and perceptions of Italian internet users. *Vaccines (Basel)*. 2021;9(9):1015.

- 1
  - 2
  - 3
  - 4
  - 5
  - 6
  - 7
  - 8
  - 9
  - 10
  - 11
  - 12
  - 13
  - 14
  - 15
  - 16
  - 17
  - 18
  - 19
  - 20
  - 21
  - 22
  - 23
  - 24
  - 25
  - 26
  - 27
  - 28
  - 29
  - 30
  - 31
  - 32
  - 33
  - 34
  - 35
  - 36
  - 37
  - 38
  - 39
  - 40
  - 41
  - 42
  - 43
  - 44
  - 45
  - 46
  - 47
  - 48
  - 49
  - 50
  - 51
  - 52
  - 53
  - 54
  - 55
  - 56
  - 57
  - 58
  - 59
  - 60
24. Becker BW. Research Faux Pas: The Stigma of Wikipedia. *Behavioral & Social Sciences Librarian*. 2015;34(3):165-9.
25. Bertholf RL. Scientific evidence, medical practice, and the insidious danger of anecdotal reports. *Lab Medicine*. 2021;51(6):555-6.
26. Bhat A, Subramanian K. Scientific and social media impact of pharma sponsored research preprints-boon or bane? *Current Medical Research and Opinion*. 2019;35:23.
27. Bibault JE, Katz MS, Motwani S. Social media for radiation oncologists: A practical primer. *Advances in Radiation Oncology*. 2017;2(3):277-80.
28. Blastland M, Freeman ALJ, van der Linden S, Marteau TM, Spiegelhalter D. Five rules for evidence communication. *Nature (London)*. 2020;587(7834):362-4.
29. Bosslet GT. Commentary: The good, the bad, and the ugly of social media. *Academic Emergency Medicine*. 2011;18(11):1221-2.
30. Braccia D. Web connect. Find online resources for conducting comparative effectiveness research. *ONS Connect*. 2009;24(5):16-.
31. Braillon A. The Sunshine Act Has Been for a World that Doesn't Exist Anymore. *The American journal of medicine*. 2018;131(11):e471-e.
32. Braunstein N. Ethical Issues for Students. *Journal of the Academy of Nutrition and Dietetics*. 2012;112(8):1253-4.
33. Bredenoord AL, Boeckhout M. Ancillary Care Obligations for Social Media Platforms. *The American journal of bioethics : AJOB*. 2017;17(3):29-31.
34. Bukhari A, Alshihri S, Abualenain M, Barton J, Kupsky G, Pines JM, et al. "Headache" Online Information: An Evaluation of Readability, Quality, Credibility, and Content. *Permanente journal*. 2021;25(2):1-.
35. Bullock A. Does technology help doctors to access, use and share knowledge? *Medical education*. 2014;48(1):28-33.
36. Cain J, Fink JL. Legal and ethical issues regarding social media and pharmacy education. *American journal of pharmaceutical education*. 2010;74(10):184.
37. Capel I, Wong A, Rowl, M, Olusanya O, Malbrain MLNG. Social media in critical care: Variation across professional groups. *Anaesthesiology Intensive Therapy*. 2019;51:57.
38. Carson NJ, Gansner M, Khang J. Assessment of Digital Media Use in the Adolescent Psychiatric Evaluation. *Child and Adolescent Psychiatric Clinics of North America*. 2018;27(2):133-43.
39. Casigliani V, De Nard F, De Vita E, Arzilli G, Grosso FM, Quattrone F, et al. Too much information, too little evidence: Is waste in research fuelling the covid-19 infodemic? *The BMJ*. 2020;370.
40. Casswell S. Conflict of interest and alcohol discourse-a new face but familiar messages. *New Zealand Medical Journal*. 2018;131(1483):59-62.
41. Chan SD. Being professional in the social media world. *The Journal of the American College of Dentists*. 2012;79(4):48-55.
42. Chretien KC, Kind T. Social media and clinical care: Ethical, professional, and social implications. *Circulation*. 2013;127(13):1413-21.
43. Coutts AJ. Dealing With Conflicts of Interest. *International Journal of Sports Physiology & Performance*. 2018;13(10):1257-8.
44. Cunningham A. *Social media and medical professionalism*. Cardiff UK Malden, Massachusetts: Wiley-Blackwell; 2014 2014. 110-2 p.
45. Dainton C. Physician-writers in the age of blogging. *CMAJ: Canadian Medical Association Journal*. 2009;181(5):348-.
46. De Ambrogi M. A doctor's choice. *The Lancet*. 2019;394(10202):908.
47. Decamp M. Social media guidance, conflicts of interest, and health inequalities...*Lancet*. 2012 Apr 28;379(9826):1562. *Lancet*. 2012;380(9840):472-3.

- 1
- 2
- 3
- 4 48. DeCamp M, Koenig TW, Chisolm MS. Social media and physicians' online identity crisis. *JAMA - Journal of the American Medical Association*. 2013;310(6):581-2.
- 5
- 6 49. DeCamp M. Doctors don't disclose conflicts of interest on social media. *Healthcare Risk Management*. 2013;35(1):9-10.
- 7
- 8 50. DeChello PL. Legal and ethical issues: what the clinician really needs to know. *PARADIGM (Targeted Publications Group, Inc)*. 2012;17(2):20-2.
- 9
- 10 51. Denecke K. Ethical Aspects of Using Medical Social Media in Healthcare Applications. *Studies in Health Technology & Informatics*. 2014;198:55-62.
- 11
- 12 52. Dolgin E. The hunt for the lesser-known funding source. *Nature*. 2019;570(7759):127-9.
- 13 53. Douglas A, Capdeville M. From Index Medicus to the Palm of Our Hands—What's “App-ening” in Graduate Medical Education. *Journal of Cardiothoracic and Vascular Anesthesia*. 2020;34(8):2133-5.
- 14
- 15 54. Drone J. It's on Facebook, So It Must Be True. *Journal (Indiana Dental Association)*. 2015;94(4):16-9.
- 16
- 17 55. Dugdale LS, Braswell H. Instacash: The Ethics of Leveraging Medical Student Status on Social Media. *Academic medicine : journal of the Association of American Medical Colleges*. 2021;96(4):507-11.
- 18
- 19 56. Physician-owned group or corporation: pros, cons. *ED Management*. 2005;17(4):39-40.
- 20
- 21 57. Englund H, Chappy S, Jambunathan J, Gohdes E. Ethical reasoning and online social media. *Nurse educator*. 2012;37(6):242-7.
- 22
- 23 58. Essary AC. The impact of social media and technology on professionalism in medical education. *Journal of Physician Assistant Education*. 2011;22(4):50-3.
- 24
- 25 59. Failli V, Kleitman N, Lammertse DP, Hsieh JTC, Steeves JD, Fawcett JW, et al. Experimental treatments for Spinal Cord Injury: What you should know. *Topics in Spinal Cord Injury Rehabilitation*. 2021;27(2):50-73.
- 26
- 27 60. Faloon W. As we see it. Dietary supplements attacked by the media. *Life Extension*. 2006;12(6):7-18.
- 28
- 29 61. Farrelly R. Nurses and social media. *British journal of nursing (Mark Allen Publishing)*. 2014;23(6):343.
- 30
- 31 62. Fattore D, Delfino M, Fabbrocini G. Legal, medical, and ethical implications of instant messaging application use in dermatology. *International Journal of Dermatology*. 2019;58(10):e206-e7.
- 32
- 33 63. Fontanarosa PB, Bauchner H, Golub RM. Thank You to Peer Reviewers, Authors, and Readers of JAMA. *JAMA - Journal of the American Medical Association*. 2019;321(11):1057-8.
- 34
- 35 64. Doctors should use caution when tweeting. *For the Record (Great Valley Publishing Company, Inc)*. 2011;23(6):30-.
- 36
- 37 65. Clinicians Lack Guidance for Social Media Disclosures. *For the Record (Great Valley Publishing Company, Inc)*. 2013;25(1):8-9.
- 38
- 39 66. Frankish K, Ryan C, Harris A. Psychiatry and online social media: potential, pitfalls and ethical guidelines for psychiatrists and trainees. *Australasian Psychiatry*. 2012;20(3):181-7.
- 40
- 41 67. Galbraith KL. Practical and Ethical Considerations for Using Social Media in Community Consultation and Public Disclosure Activities Consideraciones Prácticas y Éticas para el Uso de los Medios Sociales en las Consultas a la Comunidad y la. *Academic Emergency Medicine*. 2014;21(10):1151-7.
- 42
- 43 68. Gifford ED, Mouawad NJ, Bowser KE, Bush RL, Chandra V, Coleman DM, et al. Society for Vascular Surgery best practice recommendations for use of social media. *Journal of vascular surgery*. 2021;74(6):1783-91.e1.
- 44
- 45 69. Gilligan JT, Gologorsky Y. #Fake News: Scientific Research in the Age of Misinformation. *World Neurosurgery*. 2019;131:284.
- 46
- 47 70. Gordon D. Blogging for medical communication professionals. *AMWA Journal: American Medical Writers Association Journal*. 2010;25(2):83-.
- 48
- 49
- 50
- 51
- 52
- 53
- 54
- 55
- 56
- 57
- 58
- 59
- 60

- 1
- 2
- 3
- 4 71. Gottlieb M, Dyer S. Information and Disinformation: Social Media in the COVID-19 Crisis. *Academic Emergency Medicine*. 2020;27(7):640-1.
- 5
- 6 72. Grace PJ. Nurses Spreading Misinformation. *The American journal of nursing*. 2021;121(12):49-53.
- 7
- 8 73. Grummer-Strawn LM, Holliday F, Jungo KT, Rollins N. Sponsorship of national and regional professional paediatrics associations by companies that make breast-milk substitutes: Evidence from a review of official websites. *BMJ Open*. 2019;9(8).
- 9
- 10 74. Guo LN, Nambudiri V. 18230 The landscape of podcasting in dermatology: A descriptive analysis. *Journal of the American Academy of Dermatology*. 2020;83(6):AB94.
- 11
- 12 75. Gupta N, Dorfman R, Saadat S, Roostaeian J. The Plastic Surgery Social Media Influencer: Ethical Considerations and a Literature Review. *Aesthetic surgery journal*. 2020;40(6):691-9.
- 13
- 14 76. Haddas R, Samtani R, Webb AJ, Burlleson JR, Berven SH, Theologis AA, et al. P72. Spine surgeons social dilemma: Benefits and risks of social media for spine surgery practice in the 21st century. *Spine Journal*. 2021;21(9):S174-S5.
- 15
- 16 77. Haldar S. Advertisement vis-a-vis medical profession. *Journal of the Indian Medical Association*. 2010;108(2):77.
- 17
- 18 78. Hampton T, Hampton T. NIH eases ethics rules on employees: consulting ban to remain. *JAMA: Journal of the American Medical Association*. 2005;294(14):1749-50.
- 19
- 20 79. Hanley KJ. A blessing and a curse. *The New York state dental journal*. 2012;78(2):4-5.
- 21
- 22 80. Harris R. Blog spot. A massive opportunity for the profession. *Synergy News*. 2012:2-.
- 23
- 24 81. Henderson ML, Chevinsky J. Medical ethics and the media: the value of a story. *The virtual mentor : VM*. 2014;16(8):642-7.
- 25
- 26 82. Henderson ML, Herbst L, Love AD. Social Media and Kidney Transplant Donation in the United States: Clinical and Ethical Considerations When Seeking a Living Donor. *American Journal of Kidney Diseases*. 2020;76(4):583-5.
- 27
- 28 83. Henry RK, Pieren JA. The use of social media in dental hygiene programs: a survey of program directors. *Journal of dental hygiene : JDH*. 2014;88(4):243-9.
- 29
- 30 84. Hernández-Aguado I, Chilet-Rosell E. The role of the media in the health policymaking process: perspectives of key actors in Spain. *Critical Public Health*. 2020;30(3):270-9.
- 31
- 32 85. Hessari NM, Van Schalkwyk MC, Thomas S, Petticrew M. Reply to comment on maani hessari, n.; van schalkwyk, m.c.; thomas, s.; petticrew, m. alcohol industry csr organisations: What can their twitter activity tell us about their independence and their priorities? a comparative analysis. *int. j. environ. res. public health* 2019, 16, 892. *International Journal of Environmental Research and Public Health*. 2019;16(14).
- 33
- 34 86. Hetzler PT, Makar KG, Baker SB, Fan KL, Vercler CJ. Time for a Consensus? Considerations of Ethical Social Media Use by Pediatric Plastic Surgeons. *Plastic and reconstructive surgery*. 2020;146(6):841e-2e.
- 35
- 36 87. Holden A. Social media and professionalism: does the profession need to re-think the parameters of professionalism within social media? *Australian dental journal*. 2017;62(1):23-9.
- 37
- 38 88. Huby K, Smith J. Relevance of social media to nurses and healthcare: 'to tweet or not to tweet'. *Evidence-based nursing*. 2016;19(4):105-6.
- 39
- 40 89. Hwang Y, Jeong S-H. "This is a sponsored blog post, but all opinions are my own": The effects of sponsorship disclosure on responses to sponsored blog posts. *Computers in Human Behavior*. 2016;62:528-35.
- 41
- 42 90. Hwong AR, Qaragholi N, Carpenter D, Joffe S, Campbell EG, Soleymani Lehmann L. A Systematic Review of State and Manufacturer Physician Payment Disclosure Websites: Implications for Implementation of the Sunshine Act. *Journal of Law, Medicine & Ethics*. 2014;42(2):208-19.
- 43
- 44
- 45
- 46
- 47
- 48
- 49
- 50
- 51
- 52
- 53
- 54
- 55
- 56
- 57
- 58
- 59
- 60

- 1
- 2
- 3
- 4 91. Islam SMS, Tabassum R, Liu Y, Chen S, Redfern J, Kim SY, et al. The role of social media in
- 5 preventing and managing non-communicable diseases in low-and-middle income countries: Hope or
- 6 hype? *Health Policy and Technology*. 2019;8(1):96-101.
- 7 92. Jiang XS, Madrigal E, Roy-Chowdhuri S. A Twitter primer: Dos and don'ts for cytopathologists.
- 8 *Diagnostic Cytopathology*. 2017;45(7):577-9.
- 9 93. Jones DM, Guy MC, Soule E, Sakuma K-LK, Pokhrel P, Orloff M, et al. Characterization of
- 10 Electronic Cigarette Warning Statements Portrayed in YouTube Videos. *Nicotine & tobacco research*.
- 11 2021;23(8):1358-66.
- 12 94. Joshi KG. How to best use digital technology to help your patients. *Current Psychiatry*.
- 13 2020;19(7):47.
- 14 95. Facebook: A Bibliographic Analysis of the PsycINFO Database. *Journal of Instructional Psychology*.
- 15 2012;39(1):63-5.
- 16 96. WMA Guidelines on Promotional Mass Media Appearances by Physicians. *Journal of Korean*
- 17 *medical science*. 2015;30(12):1715.
- 18 97. Katz MS. Social media and medical professionalism: The need for guidance. *European Urology*.
- 19 2014;66(4):633-4.
- 20 98. Kh, pur S, Pahwa P. Conflict of interest. *Indian Journal of Dermatology, Venereology & Leprology*.
- 21 2009;75(3):225-8.
- 22 99. Kirschner KL, Blake V, Hahn D, Timimi FK, Huang M. Social Media: Boon or Boondoggle for Health
- 23 Care Professionals? *PM and R*. 2013;5(4):335-9.
- 24 100. Kleebauer A. New code of conduct a step closer as nurses' feedback taken on board. *Nursing*
- 25 *standard (Royal College of Nursing (Great Britain) : 1987)*. 2014;29(3):9.
- 26 101. Knoepfler PS. When patients reach out, scientists should reach back carefully. *Nature Medicine*.
- 27 2016;22(3):230.
- 28 102. Knopf A. Ashley pulls lending website after Twitter scuffle. *Alcoholism & Drug Abuse Weekly*.
- 29 2018;30(46):3-4.
- 30 103. Korman AM, Fabbro SK. Direct-to-consumer pharmaceutical services in dermatology: Ethical
- 31 implications. *Journal of the American Academy of Dermatology*. 2021;85(4):1067-8.
- 32 104. Kullgren JT, Harkins KA, Bellamy SL, Gonzales A, Tao Y, Zhu J, et al. A Mixed-Methods Randomized
- 33 Controlled Trial of Financial Incentives and Peer Networks to Promote Walking Among Older Adults.
- 34 *Health Education & Behavior*. 2014;41(1):435-505.
- 35 105. Kunze KN, Polce EM, Vadhera A, Williams BT, Nwachukwu BU, Nho SJ, et al. What Is the
- 36 Predictive Ability and Academic Impact of the Altmetrics Score and Social Media Attention? *American*
- 37 *Journal of Sports Medicine*. 2020;48(5):1056-62.
- 38 106. Lachman VD. Social Media: Managing the Ethical Issues. *Med-Surg Matters*. 2013;22(5):326-9.
- 39 107. Lackner Marx J. Point-Counterpoint: Industry Sponsorship of CME. *AMWA Journal: American*
- 40 *Medical Writers Association Journal*. 2012;27(1):20-1.
- 41 108. Lagu T, Greysen SR. Physician, monitor thyself: professionalism and accountability in the use of
- 42 social media. *Journal of Clinical Ethics*. 2011;22(2):187-90.
- 43 109. Layng J. From our facebook page. *Today in PT*. 2012;6(3):10-.
- 44 110. Lazard AJ. Design cues for tobacco communication: Heuristic interpretations and usability of
- 45 online health information about harmful chemicals. *International Journal of Medical Informatics*.
- 46 2020;141:104177.
- 47 111. Lee S, Choeh JY. The determinants of helpfulness of online reviews. *Behaviour & Information*
- 48 *Technology*. 2016;35(10):853-63.
- 49 112. Lee A, Morling J. COVID19: The need for public health in a time of emergency. *Public Health*.
- 50 2020;182:188-9.
- 51
- 52
- 53
- 54
- 55
- 56
- 57
- 58
- 59
- 60



- 1  
2  
3 113. Lerner BH. Policing online professionalism: Are we too alarmist? *JAMA Internal Medicine*.  
4 2013;173(19):1767-8.
- 5 114. Lin W-Y, Zhang X, Song H, Omori K. Health information seeking in the Web 2.0 age: Trust in social  
6 media, uncertainty reduction, and self-disclosure. *Computers in Human Behavior*. 2016;56:289-94.
- 7 115. Lusic I, Moss S. Health care, research benefit from funds. *ASHA Leader*. 2009;14(6):1-8.
- 8 116. Macauley R, Elster N, Fanaroff JM, Comm Med Liability Risk M, Comm B, Committee On  
9 Bioethics COML, et al. Ethical considerations in pediatricians' use of social media. *Pediatrics (Evanston)*.  
10 2021;147(3):1.
- 11 117. MacWilliam L. Media bias, conflicts of interest: distort study findings on supplements. *Life*  
12 *Extension*. 2006;12(6):58-68.
- 13 118. Mansfield SJ, Morrison SG, Stephens HO, Bonning MA, Wang SH, Withers AH, et al. Social media  
14 and the medical profession. *Medical Journal of Australia*. 2011;194(12):642-4.
- 15 119. Margaret E, Yip W, Mehta MD, Samplaski MK. Male infertility websites: what are our patients  
16 reading? *Fertility and Sterility*. 2019;112(3):e422-e3.
- 17 120. Mayes C, Williams J, Lipworth W. Conflicted hope: social egg freezing and clinical conflicts of  
18 interest. *Health Sociology Review*. 2018;27(1):45-59.
- 19 121. McCarthy CP, DeCamp M, McEvoy JW. The Reply. *The American journal of medicine*.  
20 2018;131(11):e473.
- 21 122. McComas KA. The role of trust in health communication and the effects of conflicts of interest  
22 among scientists. *Proceedings of the Nutrition Society*. 2008;67(4):428-36.
- 23 123. McCullough M. One Size Does Not Fit All: The Ethical Imperative to Limit the Concept of  
24 Research Exceptionalism. *American Journal of Bioethics*. 2010;10(8):60-1.
- 25 124. DOT-COM. *Medical Marketing & Media*. 2016;51(8):22-.
- 26 125. Militello M, Yang RA, Anderson JB, Szeto MD, Presley CL, Laughter MR. Social Media and Ethical  
27 Challenges for the Dermatologist. *Current dermatology reports*. 2021;10(4):120-7.
- 28 126. Milton CL. Ethics and social media. *Nursing science quarterly*. 2014;27(4):283-5.
- 29 127. Milton CL. Power with Social Media: A Nursing Perspective. *Nursing science quarterly*.  
30 2016;29(2):113-5.
- 31 128. Milton CL. The Ethics of Scholarship With Social Media. *Nursing science quarterly*.  
32 2018;31(4):330-2.
- 33 129. Minhas R. New ethical framework for pharmaceutical physicians [6]. *British Medical Journal*.  
34 2006;332(7548):1034.
- 35 130. Some plastic surgeons' social media antics raise eyebrows. *Modern Healthcare*.  
36 2017;47(43):0044-.
- 37 131. Moodley K. Generalism in healthcare: Ethical challenges in the 21st century. *South African Family*  
38 *Practice*. 2013;55(5):410-1.
- 39 132. Moses RE, McNeese LG, Feld LD, Feld AD. Social media in the health-care setting: Benefits but  
40 also a minefield of compliance and other legal issues. *American Journal of Gastroenterology*.  
41 2014;109(8):1128-32.
- 42 133. Moukarzel S, Caduff A, Rehm M, Del Fresno M, Pérez-Escamilla R, Daly AJ. Breastfeeding  
43 communication strategies, challenges and opportunities in the twitter-verse: Perspectives of influencers  
44 and social network analysis. *International journal of environmental research and public health*.  
45 2021;18(12):6181.
- 46 134. Murakami M, Kumagai A, Stojarov AN, Tsubokura M. Radiation is not a political tool. *Science*.  
47 2019;366(6465):581-2.
- 48 135. Muzumdar S, Grant-Kels JM, Farshchian M. Ethics of social media marketing by dermatologists.  
49 *Journal of the American Academy of Dermatology*. 2021;85(1):277-8.
- 50  
51  
52  
53  
54  
55  
56  
57  
58  
59  
60

136. Naeem SB, Bhatti R, Khan A. An exploration of how fake news is taking over social media and putting public health at risk. *Health information and libraries journal*. 2021;38(2):143-9.
137. Nau JY. When Facebook threatens the ethics of clinical trials. *Revue Medicale Suisse*. 2017;13(588):2098-9.
138. Neuer K, Angenendt A. The clinical trial in the area of conflict among real world data, social media and data protection - Quo vadis? Report on the 26th Symposium of the Federal Association of Contract Research Organizations (BVMA e. V.) on November 23, 2018 in Munich. *Pharmazeutische Industrie*. 2019;81(2):224-30.
139. Neville P, Waylen A. Social media and dentistry: some reflections on e-professionalism. *British dental journal*. 2015;218(8):475-8.
140. Neville P. Clicking on professionalism? Thoughts on teaching students about social media and its impact on dental professionalism. *European journal of dental education : official journal of the Association for Dental Education in Europe*. 2016;20(1):55-8.
141. News and ethics resources. *Nursing Ethics*. 2015;22(1):153-5.
142. TWEETS OF THE WEEK. *Nursing Standard*. 2016;30(51):30-.
143. Social networking: avoiding the pitfalls. *Nursing times*. 2011;107(37):15.
144. O'Glasser AY, Jaffe RC, Brooks M. To Tweet or Not to Tweet, That Is the Question. *Seminars in nephrology*. 2020;40(3):249-63.
145. O'Hanlon S, Shannon B. Comments further to: privacy, professionalism and Facebook: a dilemma for young doctors. *Medical education*. 2011;45(2):209.
146. O'Keeffe M, Barratt A, Maher C, Zadro J, Fabbri A, Jones M, et al. Media Coverage of the Benefits and Harms of Testing the Healthy: A protocol for a descriptive study. *BMJ Open*. 2019;9(8).
147. O'Rourke PP, Carrithers J, Patrick-Lake B, Rice TW, Corsmo J, Hart R, et al. Harmonization and streamlining of research oversight for pragmatic clinical trials. *Clinical Trials*. 2015;12(5):449-56.
148. Best of the Blogs. *Oncology (08909091)*. 2012;26(9):814-5.
149. Ong EG, Davis L, Sanchez A, Curiel R, Stohl H, Nelson A, et al. A COMPREHENSIVE REVIEW of WOMEN'S QUESTIONS FOLLOWING MISCARRIAGE on DIFFERENT SOCIAL MEDIA PLATFORMS. *Journal of Investigative Medicine*. 2021;70:197.
150. At a glance. Cleveland Clinic posts MD-industry ties. *OR Manager*. 2009;25(1):32-.
151. Oransky I. Web: bloggers beware: conflicts of interest and diabetes. *Lancet*. 2006;368(9548):1641-2.
152. Ornstein C. Cardiac Society Draws Bulk of Funding from Stent Makers. *Gerson Healing Newsletter*. 2011;26(5):4-.
153. Padeiro M, Bueno-Larraz B, Freitas Â. Local governments' use of social media during the COVID-19 pandemic: The case of Portugal. *Government information quarterly*. 2021;38(4).
154. Pagoto S, Nebeker C. How scientists can take the lead in establishing ethical practices for social media research. *Journal of the American Medical Informatics Association*. 2019;26(4):311-3.
155. Parasidis E, Pike E, McGraw D. A belmont report for health data. *New England Journal of Medicine*. 2019;380(16):1493-5.
156. Paterson D. Telemedicine and conflicts of interest [2]. *Veterinary Record*. 2019;185(7):209.
157. Peltier B, Curley A. The ethics of social media in dental practice: ethical tools and professional responses. *Journal of the California Dental Association*. 2013;41(7):507-13.
158. Pelton RW, Newsom TH. Is it advantageous for physicians to use social media to enhance their online presence and reputation? *Ocular Surgery News*. 2012;30(17):11-.
159. Pierce G. Payment Options in Step with the Times. *Podiatry Management*. 2019;38(8):87-90.
160. Prasad V. Inconsistent Reporting of Potential Conflicts of Interest. *JAMA Internal Medicine*. 2018;178(10):1424-5.

- 1  
2  
3 161. Prateek S, Tak H. Social media and physicians: the Indian scenario. *Indian journal of medical ethics*. 2018;3(1):83.
- 4  
5 162. Ragan MR. Social media in the health care provider office. *Today's FDA : official monthly journal of the Florida Dental Association*. 2012;24(4):20-3.
- 6  
7 163. Ranpariya V, Chu B, Fathy R, Lipoff JB. Dermatology without dermatologists? Analyzing Instagram influencers with dermatology-related hashtags. *Journal of the American Academy of Dermatology*. 2020;83(6):1840-2.
- 8  
9 164. Ravn S, Barnwell A, Barbosa Neves B. What Is “Publicly Available Data”? Exploring Blurred Public–Private Boundaries and Ethical Practices Through a Case Study on Instagram. *Journal of empirical research on human research ethics*. 2020;15(1-2):40-5.
- 10  
11 165. Rechenberg U, Josten C, Grüner S, Klima S. How does our specialty present itself on the Internet? *Zeitschrift für Orthopädie und Unfallchirurgie*. 2013;151(4):394.
- 12  
13 166. Redick DW, Hwang JC, Kloosterboer A, Yannuzzi NA, Patel NA, Kuriyan AE, et al. Content, Readability, and Accountability of Freely Available Online Information for Patients Regarding Epiretinal Membranes. *Seminars in ophthalmology*. 2022;37(1):67-70.
- 14  
15 167. New FDA guidance on clinical investigator financial disclosure. *Research Practitioner*. 2011;12(4):143-9.
- 16  
17 168. Roucka TM, Donate-Bartfield E, Zarkowski P. In social media age, watch what you say. *General dentistry*. 2014;62(1):19-21.
- 18  
19 169. Rouprêt M, Morgan TM, Bostrom PJ, Cooperberg MR, Kutikov A, Linton KD, et al. European Association of Urology (@Uroweb) recommendations on the appropriate use of social media. *European Urology*. 2014;66(4):628-32.
- 20  
21 170. Samsa G, Solomon A. Managing the science in the presence of financial conflict of interest. *Accountability in Research*. 2019;26(6):397-403.
- 22  
23 171. Santillan-Doherty P, Grether-Gonzalez P, Medina-Arellano MJ, Chan S, Tapia-Ibarguengoitia R, Brena-Sesma I, et al. Considerations on genetic engineering: regarding the birth of twins subjected to gene edition. *Gaceta Medica de Mexico*. 2020;156(1):53-9.
- 24  
25 172. Santoro E. Social media and health communication: Do we need rules? *Recenti Progressi in Medicina*. 2015;106(1):15-6.
- 26  
27 173. Santoro E. [Social media and health: it's time to refine the methodology for interpreting studies and evaluating information.]. *Social media e salute: affinare la metodologia per interpretare e valutare le informazioni*. 2022;113(2):73-5.
- 28  
29 174. Sartor O. Conflicts of Interest, Baselga, and Clinical Trialists. *Oncologist*. 2018;23(12):1394-.
- 30  
31 175. Scruth EA, Pugh DM, Adams CL, Foss-Durant AM. Electronic and social media: the legal and ethical issues for healthcare. *Clinical nurse specialist CNS*. 2015;29(1):8-11.
- 32  
33 176. Seppey M, Ridde V, Touré L, Coulibaly A. Donor-funded project's sustainability assessment: a qualitative case study of a results-based financing pilot in Koulikoro region, Mali. *Globalization & Health*. 2017;13:1-15.
- 34  
35 177. Sh, J, Turner S. System wide collaboration? Health and social care leaders' perspectives on working across boundaries. *Journal of Integrated Care*. 2019;27(1):83-94.
- 36  
37 178. Sharma P, Francis DP. Social media influencers in cardiology/metabolism-a force for good or evil? *Heart and Metabolism*. 2020(82):36-40.
- 38  
39 179. Shore R, Halsey J, Shah K, Crigger B-J, Douglas SP. Report of the AMA Council on Ethical and Judicial Affairs: professionalism in the use of social media. *Journal of Clinical Ethics*. 2011;22(2):165-72.
- 40  
41 180. Silva DAF, Colleoni R. Patient's privacy violation on social media in the surgical area. *American Surgeon*. 2018;84(12):1900-5.
- 42  
43 181. Sissung TM, Figg WD. Facebook groups for alternative treatments for cancer: advertising masquerading as community support. *The lancet oncology*. 2021;22(1):25-6.
- 44  
45  
46  
47  
48  
49  
50  
51  
52  
53  
54  
55  
56  
57  
58  
59  
60



- 1  
2  
3 182. Slagle E, Sinacore J, Brubaker L. Conflict of interest disclosure in obstetrics & gynecology. *Obstetrics & Gynecology*. 2011;118(5):1108-10.
- 4  
5 183. Smyth D. Web words. Breaking bad news: part 2. *International Journal of Palliative Nursing*. 2005;11(1):46-.
- 6  
7 184. Snyder L. Online professionalism: social media, social contracts, trust, and medicine. *Journal of Clinical Ethics*. 2011;22(2):173-5.
- 8  
9 185. Studenic P, Stones S, Alunno A, Ritschl V, Nikiphorou E. People with rheumatic and musculoskeletal diseases connect and learn about health-related issues using social media. *Annals of the Rheumatic Diseases*. 2019;78:2078.
- 10  
11 186. Swartz MK. Professional Conduct and Social Media. *Journal of pediatric health care : official publication of National Association of Pediatric Nurse Associates & Practitioners*. 2016;30(3):185-6.
- 12  
13 187. Tanchuco JQ. Pandemic publication ethics. *Phillippine Journal of Internal Medicine*. 2020;58(3):1-3.
- 14  
15 188. Technology, Practice Committees of the American Society for Reproductive M, the Advertising Committee of the Society for Assisted Reproductive T, Technology, Practice Committees of the American Society for Reproductive M, the Advertising Committee of the Society for Assisted Reproductive Technology. Electronic address Aao. Guidance on the use of social media in reproductive medicine practice. *Fertility and sterility*. 2021;115(5):1151-5.
- 16  
17 189. Terrasse M, Gorin M, Sisti D. Social Media, E-Health, and Medical Ethics. *Hastings Center Report*. 2019;49(1):24-33.
- 18  
19 190. What nurses are saying. *The American nurse*. 2015;47(1):10.
- 20  
21 191. Tulloch J, Zinn J. Risk, health and the media. *Health, Risk & Society*. 2011;13(1):1-16.
- 22  
23 192. van Cauwenberghe CE. Stakeholders portrait in the pharmaceutical industry. C. E. van Cauwenberghe, Frost and Sullivan, United States2012 2012. 38-44 p.
- 24  
25 193. Van Eperen L, Marincola FM, Strohm J. Bridging the divide between science and journalism. *Journal of Translational Medicine*. 2010;8:25.
- 26  
27 194. Varghese TK, Entwistle JW, Mayer JE, Moffatt-Bruce SD, Sade RM. Ethical standards for cardiothoracic surgeons' participation in social media. *The Journal of thoracic and cardiovascular surgery*. 2019;158(4):1139-43.
- 28  
29 195. Varghese TK, Entwistle JW, Mayer JE, Moffatt-Bruce SD, Sade RM, Blitzer D, et al. Ethical Standards for Cardiothoracic Surgeons' Participation in Social Media. *The Annals of thoracic surgery*. 2019;108(3):666-70.
- 30  
31 196. Vogel EA, Guillory J, Ling PM. Sponsorship Disclosures and Perceptions of E-cigarette Instagram Posts. *Tobacco regulatory science*. 2020;6(5):355-68.
- 32  
33 197. Wagner L, Paquin R, Persky S. Genetics blogs as a public health tool: Assessing credibility and influence. *Public Health Genomics*. 2012;15(3-4):218-25.
- 34  
35 198. Wallen B. NYSCHP Corporate Sponsor Scholarship Essay Award: Social Media, Friend or Foe? *Journal of Pharmacy Practice*. 2013;26(4):454-5.
- 36  
37 199. Wang Z, Wang S, Zhang Y, Jiang X. Social media usage and online professionalism among registered nurses: A cross-sectional survey. *International Journal of Nursing Studies*. 2019;98:19-26.
- 38  
39 200. Wayant C, Turner E, Meyer C, Sinnett P, Vassar M. Financial Conflicts of Interest Among Oncologist Authors of Reports of Clinical Drug Trials. *JAMA Oncology*. 2018;4(10):1426-8.
- 40  
41 201. Weijs C, Majowicz S, Coe JB, Desmarais S, Jones-Bitton A. The personal use of Facebook by public health professionals in Canada: Implications for public health practice. *Journal of Communication in Healthcare*. 2017;10(1):8-15.
- 42  
43 202. Weijs C, Coe J, Desmarais S, Majowicz S, Jones-Bitton A. Effects of Mock Facebook Workday Comments on Public Perception of Professional Credibility: A Field Study in Canada. *Journal of Medical Internet Research*. 2019;21(4):N.PAG-N.PAG.
- 44  
45  
46  
47  
48  
49  
50  
51  
52  
53  
54  
55  
56  
57  
58  
59  
60

- 1  
2  
3 203. Weinstein ALBS, Saadeh PBMD, Warren SMMDF. Social networking services: Implications for the  
4 next generation of physicians. *Surgery*. 2011;150(1):15-6.  
5 204. Wheelock A, Ives J. Vaccine confidence, public understanding and probity: time for a shift in  
6 focus? *Journal of medical ethics*. 2021;48(4):250-5.  
7 205. White E. Funding for research. *Mental Health Occupational Therapy*. 2007;12(3):93-  
8 206. Wilkinson J. Accessible, Dynamic Web Content Using Instagram. *Information Technology &*  
9 *Libraries*. 2018;37(1):19-26.  
10 207. Williams JB, Mathews R, D'Amico TA. "Reality surgery" a research ethics perspective on the live  
11 broadcast of surgical procedures. *Journal of Surgical Education*. 2011;68(1):58-61.  
12 208. Wisniewski J. A Matter of Trust: A Webmaster Perspective. *Online Searcher*. 2017;41(4):66-8.  
13 209. Yan Q, Goei C, Jensen K, Langley A, Pounds L, Davies M. Quality and Readability of Online Patient  
14 Resources for Varicose Veins—Do We Know What Is Out There? *Journal of Vascular Surgery: Venous and*  
15 *Lymphatic Disorders*. 2020;8(2):330.  
16 210. Yeh RW. Academic Cardiology and Social Media: Navigating the Wisdom and Madness of the  
17 Crowd. *Circulation: Cardiovascular Quality & Outcomes*. 2018;11(4):1-3.  
18 211. Yeo S, Eigl B, Ingledew PA. A fountain of knowledge? The quality of online resources for testicular  
19 cancer patients. *Canadian Urological Association Journal*. 2020;23:23.  
20 212. Zember WF, Fishman EK, Horton KM, Raman SP. How social media can impact medicine and  
21 radiology. *Journal of the American College of Radiology*. 2015;12(6):620-1.  
22 213. Zenone M, Kenworthy N, Barbic S. The Paradoxical Relationship Between Health Promotion and  
23 the Social Media Industry. *Health promotion practice*. 2021:15248399211064640.  
24 214. Zhitomirsky-Geffet M, Bratspiess Y. Professional information disclosure on social networks: The  
25 case of Facebook and Linked In in Israel. *Journal of the Association for Information Science & Technology*.  
26 2016;67(3):493-504.  
27 215. Zhou J, Bercovitch L. Instagram and the dermatologist: An ethical analysis. *Journal of the*  
28 *American Academy of Dermatology*. 2018;78(6):1226-8.  
29  
30  
31  
32  
33  
34  
35  
36  
37  
38  
39  
40  
41  
42  
43  
44  
45  
46  
47  
48  
49  
50  
51  
52  
53  
54  
55  
56  
57  
58  
59  
60

## Supplementary file 5: Characteristics of the 17 included studies related to conflicts of interest.

| Author, Year        | Date of search/data collection | Start Upload Date | End Upload Date | Period of coverage | Population                                                                                                                                                                        | Study outcomes                         | Funding of the study | COI of study authors | Country of study authors | Country of the subjects of study | Type of social media             | Focus                                                                               | Language of posts    | Subject of COI                                                                                            | Type of COI   | Sources of COI | Tools to assess the presence of COI | Results                                                                                                                                                                                                                                                                                                                                                                                                                                           |
|---------------------|--------------------------------|-------------------|-----------------|--------------------|-----------------------------------------------------------------------------------------------------------------------------------------------------------------------------------|----------------------------------------|----------------------|----------------------|--------------------------|----------------------------------|----------------------------------|-------------------------------------------------------------------------------------|----------------------|-----------------------------------------------------------------------------------------------------------|---------------|----------------|-------------------------------------|---------------------------------------------------------------------------------------------------------------------------------------------------------------------------------------------------------------------------------------------------------------------------------------------------------------------------------------------------------------------------------------------------------------------------------------------------|
| Betschart 2020 [21] | May 2019                       | July 2007         | May 2019        | 12 years           | Cross-sectional: Survey of 159 YouTube videos addressing treatment options for lower urinary tract symptoms with benign prostatic hyperplasia                                     | Frequency of reporting of COI          | Not reported         | None                 | Switzerland and Germany  | Not reported                     | YouTube                          | Urology: lower urinary tract symptoms associated with benign prostatic hyperplasia. | English              | Physicians, clinic, hospital, or university<br><br>Others: Industry, news media, societies/or ganizations | Not specified | Not specified  | None                                | <ul style="list-style-type: none"> <li>1.3% (2/159) videos included a disclosure of conflicts of interest</li> <li>83.6% (133/159) of the videos were subject to commercial bias (defined as information presented in a manner that attempts to sway participants' opinions in favor of a particular commercial product for the express purpose of furthering a commercial entity's business, meaning a deliberate intent to mislead).</li> </ul> |
| Chretien 2009 [29]  | March/April 2009               | N/A               | N/A             | N/A                | Cross-sectional: Electronic survey of 78 deans of student affairs, their representatives, or counterparts from US medical schools in the Association of American Medical Colleges | Unprofessional incidents involving COI | Not reported         | None                 | United States            | United States                    | Web 2.0: not specified otherwise | General                                                                             | English <sup>1</sup> | Medical students                                                                                          | Not specified | Industry       | None                                | <ul style="list-style-type: none"> <li>4% (2/46) of all reported unprofessional incidents involved conflicts of interest (e.g., product endorsement without a COI disclosure)</li> </ul>                                                                                                                                                                                                                                                          |
| Chretien 2011 [20]  | May 2010                       | May 1, 2010       | May 31, 2010    | 1 month            | Cross-sectional:                                                                                                                                                                  | Unprofessional                         | Not reported         | None                 | United States            | United States,                   | Twitter                          | General: surgery,                                                                   | English              | Physicians                                                                                                | Not specified | Industry       | None                                | <ul style="list-style-type: none"> <li>8.3% (12/144) of unprofessional tweets</li> </ul>                                                                                                                                                                                                                                                                                                                                                          |

1  
2  
3  
4  
5  
6  
7  
8  
9  
10  
11  
12  
13  
14  
15  
16  
17  
18  
19  
20  
21  
22  
23  
24  
25  
26  
27  
28  
29  
30  
31  
32  
33  
34  
35  
36  
37  
38  
39  
40  
41  
42  
43  
44  
45  
46  
47  
48  
49  
50  
51  
52  
53  
54  
55  
56  
57  
58  
59  
60

|                   |               |              |               |        |                                                                                                   |                                                |                                                                                     |                                                                                                                                                                        |                |                                                |               |                                                                                                                          |                      |                                                                        |                                 |                    |      |                                                                                                                                                                                                                                                                        |
|-------------------|---------------|--------------|---------------|--------|---------------------------------------------------------------------------------------------------|------------------------------------------------|-------------------------------------------------------------------------------------|------------------------------------------------------------------------------------------------------------------------------------------------------------------------|----------------|------------------------------------------------|---------------|--------------------------------------------------------------------------------------------------------------------------|----------------------|------------------------------------------------------------------------|---------------------------------|--------------------|------|------------------------------------------------------------------------------------------------------------------------------------------------------------------------------------------------------------------------------------------------------------------------|
|                   |               |              |               |        | Survey of 5156 tweets of 260 self-identified physicians with >500 followers                       | tweets involving 'possible' COI                |                                                                                     |                                                                                                                                                                        |                | Europe, Canada, Asia, Australia, not specified |               | internal medicine, family medicine, pediatrics, psychiatry, emergency medicine, obstetrics/gynecology, and not specified |                      |                                                                        |                                 |                    |      | involved 'possible' conflicts of interest (i.e., making unsupported claims about a product being sold on the physician's website or repeatedly promoting specific health products)                                                                                     |
| Greysen 2012 [9]  | N/A           | N/A          | N/A           | N/A    | Cross-sectional: Survey of 48 executive directors of all medical and osteopathic boards in the US | Unprofessional incidents involving COI         | Funded by the Robert Wood Johnson Foundation and the Department of Veterans Affairs | 1/5 reported serving as a scientific advisory board member for Fair Health Inc and receiving funding as a collaborator on the Yale University Open Data Access project | United States  | United States                                  | Not specified | General                                                                                                                  | English <sup>1</sup> | Physicians                                                             | Not specified                   | Not specified      | None | <ul style="list-style-type: none"> <li>56% of state medical boards indicated that they received reports of violations related to "failure to reveal conflicts of interest online" (estimated percentage from the figure)</li> </ul>                                    |
| Hessari 2019 [30] | December 2016 | January 2016 | December 2016 | 1 year | Cross-sectional: Survey of a total of 2805 tweets of Alcohol industry (AI)-                       | Association between COI and content of posting | None                                                                                | None                                                                                                                                                                   | United Kingdom | United Kingdom, Ireland, Australia             | Twitter       | Social aspects/public relations organizations related to alcohol                                                         | English <sup>1</sup> | Alcohol industry (AI)-funded organizations and non-AI-funded charities | Sponsorship by alcohol industry | Alcohol industries | None | <ul style="list-style-type: none"> <li>None (0/1156) of alcohol-industry funded organizations tweets mentioned alcohol marketing, advertising, and sponsorship; issues related to alcohol pricing; physical health harms, including cancers, heart disease,</li> </ul> |

1  
2  
3  
4  
5  
6  
7  
8  
9  
10  
11  
12  
13  
14  
15  
16  
17  
18  
19  
20  
21  
22  
23  
24  
25  
26  
27  
28  
29  
30  
31  
32  
33  
34  
35  
36  
37  
38  
39  
40  
41  
42  
43  
44  
45  
46  
47  
48  
49  
50  
51  
52  
53  
54  
55  
56  
57  
58  
59  
60

|                    |                |     |     |     |                                                                                                                                                                                                                                |                                                                                     |              |                                                                         |               |               |         |                     |         |                                |                        |                            |                        |  |                                                                                                                                                                                                                                                                                                                                                                                                                                                                                                                                                                                                                                                                                                                                                                                                                                                                                                                                                                                                                                                                                       |
|--------------------|----------------|-----|-----|-----|--------------------------------------------------------------------------------------------------------------------------------------------------------------------------------------------------------------------------------|-------------------------------------------------------------------------------------|--------------|-------------------------------------------------------------------------|---------------|---------------|---------|---------------------|---------|--------------------------------|------------------------|----------------------------|------------------------|--|---------------------------------------------------------------------------------------------------------------------------------------------------------------------------------------------------------------------------------------------------------------------------------------------------------------------------------------------------------------------------------------------------------------------------------------------------------------------------------------------------------------------------------------------------------------------------------------------------------------------------------------------------------------------------------------------------------------------------------------------------------------------------------------------------------------------------------------------------------------------------------------------------------------------------------------------------------------------------------------------------------------------------------------------------------------------------------------|
|                    |                |     |     |     | funded organizations (1156 tweets) and non-AI-funded charities (1649 tweets)                                                                                                                                                   |                                                                                     |              |                                                                         |               |               |         | awareness           |         |                                |                        |                            |                        |  | dementia and diabetes; and fertility and pregnancy                                                                                                                                                                                                                                                                                                                                                                                                                                                                                                                                                                                                                                                                                                                                                                                                                                                                                                                                                                                                                                    |
| Kaestner 2017 [28] | Jan 7-25, 2017 | N/A | N/A | N/A | Cross-sectional: Survey of twitter accounts of 156 hematologist-oncologists in the US with a FCOI (at least US\$1000 in 2014), and frequent tweets (at least 100 total Tweets); physicians with private accounts were excluded | Proportion of undisclosed COI<br><br>Association between COI and content of posting | Not reported | 1/4 reported receiving payments for his book "Ending Medical Reversal". | United States | United States | Twitter | Hematology-oncology | English | Hematology-oncology physicians | Financial COI: payment | Biopharmaceutical industry | Open Payments database |  | <ul style="list-style-type: none"> <li>10.1% (166/1649) of non-industry-funded organizations tweets mentioned alcohol marketing, advertising, and sponsorship; issues related to alcohol pricing; physical health harms, including cancers, heart disease, dementia and diabetes; and fertility and pregnancy</li> <li>1.3% (2/156 physicians) of U.S.-based hematologist-oncologists, who had financial conflicts of interest according to OPD, included disclosures of their payments, and these were in their 5-line twitter biography.</li> <li>81% (126/156) of physicians mentioned at least one drug from a company for which they had a FCOI</li> <li>Of 4358 total drug mentions, 52% (2252/4358) regarded conflicted drugs.</li> <li>Association between COI and coding of tweets (positive, neutral, or negative): conflicted tweets were more likely to be positive (p=0.02), similarly likely to be neutral (p=0.45), and less likely to be negative (p=0.008)</li> <li>General payment FCOI: Median \$13,668 (IQR, \$4,292-\$33,213) Range \$1,031-\$444,055</li> </ul> |

1  
2  
3  
4  
5  
6  
7  
8  
9  
10  
11  
12  
13  
14  
15  
16  
17  
18  
19  
20  
21  
22  
23  
24  
25  
26  
27  
28  
29  
30  
31  
32  
33  
34  
35  
36  
37  
38  
39  
40  
41  
42  
43  
44  
45  
46  
47  
48  
49  
50  
51  
52  
53  
54  
55  
56  
57  
58  
59  
60

|                     |                        |                 |                   |        |                                                                          |                                                        |                                                                                  |              |               |               |                                                                               |                    |                      |                                                                                                              |                                                                                                                        |                                                                   |                        |                                                                                                                                                                                                                                                                                                                                                                                                                                                                          |
|---------------------|------------------------|-----------------|-------------------|--------|--------------------------------------------------------------------------|--------------------------------------------------------|----------------------------------------------------------------------------------|--------------|---------------|---------------|-------------------------------------------------------------------------------|--------------------|----------------------|--------------------------------------------------------------------------------------------------------------|------------------------------------------------------------------------------------------------------------------------|-------------------------------------------------------------------|------------------------|--------------------------------------------------------------------------------------------------------------------------------------------------------------------------------------------------------------------------------------------------------------------------------------------------------------------------------------------------------------------------------------------------------------------------------------------------------------------------|
|                     |                        |                 |                   |        |                                                                          |                                                        |                                                                                  |              |               |               |                                                                               |                    |                      |                                                                                                              |                                                                                                                        |                                                                   |                        | More than half of drug mentions refer to a median of six companies that pay these physicians                                                                                                                                                                                                                                                                                                                                                                             |
| Lagu 2008 [22]      | December 14, 2006      | January 1, 2006 | December 14, 2006 | 1 year | Cross-sectional: Survey of 271 health-related blogs by doctors or nurses | Frequency of reporting of COI                          | Partially funded by The Robert Wood Johnson Foundation Clinical Scholars program | None         | United States | Not reported  | Blogs (Medlogs, Yahoo Health and Medicine Blogs and The Medical Blog Network) | General            | English <sup>1</sup> | Physicians and nurses                                                                                        | Not specified                                                                                                          | Industry                                                          | None                   | <ul style="list-style-type: none"> <li>None (0/31) of the blogs that explicitly promoted a specific healthcare product (i.e., providing product images, descriptions, or advocacy) disclosed conflicts of interest.</li> </ul>                                                                                                                                                                                                                                           |
| Miller 2011 [11]    | June 2007 and May 2008 | N/A             | N/A               | N/A    | Cross-sectional: Survey of 951 health blogs                              | Frequency of reporting of COI                          | Not reported                                                                     | Not reported | United States | Not reported  | Blogs                                                                         | General            | English              | Physicians<br><br>Others: other non-physician health professionals, patient, individual, consumer, caregiver | Funding/sponsorship                                                                                                    | Corporation, Web site, medical group, foundation, or other entity | None                   | <ul style="list-style-type: none"> <li>15.6% (148/951) of health blogs reported sponsorship</li> </ul> <p>Sponsorship stratified by occupation (p=0.053):</p> <ul style="list-style-type: none"> <li>14.9% (29/194) of physicians reported sponsorship in their blogs</li> <li>19.7% (50/254) of other health professionals reported sponsorship in their blogs</li> <li>12.9% (58/451) of non-health-related occupations reported sponsorship in their blogs</li> </ul> |
| Niforatos 2019 [17] | N/A                    | June 1, 2017    | June 1, 2018      | 1 year | Cross-sectional: Survey of 31 FOAMed blogs and websites                  | Prevalence of COI<br><br>Proportion of undisclosed COI | Not reported                                                                     | None         | United States | United States | Blog posts and website entries                                                | Emergency medicine | English <sup>1</sup> | Emergency medicine physicians                                                                                | Financial: 1) compensation for services other than consulting, including serving as faculty or as a speaker at a venue | Industry                                                          | Open Payments database | <ul style="list-style-type: none"> <li>15.4% (45/292) of U.S.-based healthcare providers had FCOI in the 2017 Open Payments database.</li> <li>Of the 12 bloggers who had 'significant' FCOI (defined as general or research payments &gt;\$5,000 from a single company over a 12-month period): 0%</li> </ul>                                                                                                                                                           |



1  
2  
3  
4  
5  
6  
7  
8  
9  
10  
11  
12  
13  
14  
15  
16  
17  
18  
19  
20  
21  
22  
23  
24  
25  
26  
27  
28  
29  
30  
31  
32  
33  
34  
35  
36  
37  
38  
39  
40  
41  
42  
43  
44  
45  
46  
47  
48  
49  
50  
51  
52  
53  
54  
55  
56  
57  
58  
59  
60

|                     |             |     |     |     |                                                                                         |                               |              |      |       |       |         |                                 |          |                                                                                                                                                                                                                                                           |               |               |                                                                                                                                                                                                                                                                                                                                                                                                                                 |
|---------------------|-------------|-----|-----|-----|-----------------------------------------------------------------------------------------|-------------------------------|--------------|------|-------|-------|---------|---------------------------------|----------|-----------------------------------------------------------------------------------------------------------------------------------------------------------------------------------------------------------------------------------------------------------|---------------|---------------|---------------------------------------------------------------------------------------------------------------------------------------------------------------------------------------------------------------------------------------------------------------------------------------------------------------------------------------------------------------------------------------------------------------------------------|
|                     |             |     |     |     |                                                                                         |                               |              |      |       |       |         |                                 |          | other than a continuing education program; 2) consulting fee; 3) travel and lodging; 4) honoraria; 5) food and beverage; and (6) education.                                                                                                               |               |               | (0/12) disclosed FCOI in their FOAMed content. <ul style="list-style-type: none"> <li>General payment FCOI: Median \$191 (IQR, \$94.1–\$829) Range \$38,132</li> <li>Research payment FCOI: Median \$15,703 (IQR, \$10,262–\$72,916) Range \$127,261</li> <li>Type of FCOI: Food and beverages (85.8%), Travel and lodging (8.6%), Other services (1.9%), Honoraria (1.9%), consulting (1.2%), and education (0.6%).</li> </ul> |
| Nishizaki 2021 [23] | August 2021 | N/A | N/A | N/A | Cross-sectional: Survey of 72 YouTube videos reporting on pediatrics nocturnal enuresis | Frequency of reporting of COI | Not reported | None | Japan | Japan | YouTube | Pediatrics : nocturnal enuresis | Japanese | 1. Physicians, nurses<br>2. non-health personnel: (1) academic (authors/uploaders affiliated with research groups or universities/colleges); (2) non-physician health personnel (pharmacists/chiropractors/acupuncturists); (4) independent user (nursery | Not specified | Not specified | None <ul style="list-style-type: none"> <li>0% (0/72) of videos had a conflicts of interest declaration by the uploader</li> <li>0% (0/72) videos were judged to have a commercial bias</li> </ul>                                                                                                                                                                                                                              |

1  
2  
3  
4  
5  
6  
7  
8  
9  
10  
11  
12  
13  
14  
15  
16  
17  
18  
19  
20  
21  
22  
23  
24  
25  
26  
27  
28  
29  
30  
31  
32  
33  
34  
35  
36  
37  
38  
39  
40  
41  
42  
43  
44  
45  
46  
47  
48  
49  
50  
51  
52  
53  
54  
55  
56  
57  
58  
59  
60

|                      |              |               |               |          |                                                                                                                                                                                                                                          |                               |      |      |                      |              |         |                                                                                   |                                      |                                                                                                                                 |               |               |      |                                                                                                                                                                                                                                                                                                                                                                                                                                         |
|----------------------|--------------|---------------|---------------|----------|------------------------------------------------------------------------------------------------------------------------------------------------------------------------------------------------------------------------------------------|-------------------------------|------|------|----------------------|--------------|---------|-----------------------------------------------------------------------------------|--------------------------------------|---------------------------------------------------------------------------------------------------------------------------------|---------------|---------------|------|-----------------------------------------------------------------------------------------------------------------------------------------------------------------------------------------------------------------------------------------------------------------------------------------------------------------------------------------------------------------------------------------------------------------------------------------|
|                      |              |               |               |          |                                                                                                                                                                                                                                          |                               |      |      |                      |              |         |                                                                                   |                                      | schoolteachers/schoolteachers), and (5) patient and family                                                                      |               |               |      |                                                                                                                                                                                                                                                                                                                                                                                                                                         |
| Pratsinis, 2021 [24] | October 2019 | December 2006 | December 2018 | 12 years | Cross-sectional: 100 YouTube videos addressing treatment options of urinary stones                                                                                                                                                       | Frequency of reporting of COI | None | None | Switzerland, Germany | Not reported | YouTube | Urology: surgical treatment of urinary stones                                     | English                              | Physicians, clinic, hospital or university<br><br>Industry, consumer/patient, medical societies/or organizations and news media | Not specified | Not specified | None | <ul style="list-style-type: none"> <li>9% (9/100) of YouTube videos had a declaration of COI</li> <li>72% of all videos were issued by healthcare providers or medical industry</li> </ul>                                                                                                                                                                                                                                              |
| Pratsinis 2021 [25]  | October 2020 | January 2008  | June 2020     | 12 years | Cross-sectional: Survey of 240 YouTube videos reporting on benign prostatic hyperplasia, prostate cancer, and urinary stone disease. The 20 most viewed videos for each urological condition and language were included in the analysis. | Frequency of reporting of COI | None | None | Switzerland          | Not reported | YouTube | Urology: benign prostatic hyperplasia, prostate cancer, and urinary stone disease | English, French, German, and Italian | Physicians, clinic, hospital or university<br><br>Industry, consumer/patient, medical societies/or organizations and news media | Not specified | Not specified | None | <ul style="list-style-type: none"> <li>“Majority” of all videos did not have declaration of conflicts of interest</li> <li>Estimated percentage of COI declaration: across 12 categories, proportion of videos reporting on COI ranges from 4.4% - 35%, with a median of 19%; the total percentage of reporting of COI in the 240 videos is 19%</li> <li>No differences in reported COI for the different languages assessed</li> </ul> |



1  
2  
3  
4  
5  
6  
7  
8  
9  
10  
11  
12  
13  
14  
15  
16  
17  
18  
19  
20  
21  
22  
23  
24  
25  
26  
27  
28  
29  
30  
31  
32  
33  
34  
35  
36  
37  
38  
39  
40  
41  
42  
43  
44  
45  
46  
47  
48  
49  
50  
51  
52  
53  
54  
55  
56  
57  
58  
59  
60

|                  |                         |     |     |     |                                                                                       |                               |                                                                                                                                  |                                                               |               |               |                         |                     |                      |                                |                                                    |                                                                                                                    |                        |                                                                                                                                                                                                                                                                                                                                                                                                                                                                                                         |
|------------------|-------------------------|-----|-----|-----|---------------------------------------------------------------------------------------|-------------------------------|----------------------------------------------------------------------------------------------------------------------------------|---------------------------------------------------------------|---------------|---------------|-------------------------|---------------------|----------------------|--------------------------------|----------------------------------------------------|--------------------------------------------------------------------------------------------------------------------|------------------------|---------------------------------------------------------------------------------------------------------------------------------------------------------------------------------------------------------------------------------------------------------------------------------------------------------------------------------------------------------------------------------------------------------------------------------------------------------------------------------------------------------|
| Shrank 2011 [27] | November 17, 2010.      | N/A | N/A | N/A | Cross-sectional: Survey of 15 social networking sites (93% featured blogging)         | Frequency of reporting of COI | Funded (by a research grant from CVS Caremark and a career development award from the National Heart, Lung, and Blood Institute) | None                                                          | United States | All countries | Social network websites | Diabetes            | All languages        | Health bloggers                | Financial                                          | Volunteer donation, foundation, pharmaceutical manufacturer, device manufacturer, insurer, not-for-profit, webhost | None                   | <p>1. Industry sponsorship: Pharmaceutical manufacturers: <b>53.3%</b> (8/15)</p> <p>Diabetes device manufacturers: <b>60%</b> (9/15)</p> <p>Webhost Sponsorship: <b>13.3%</b> (2/15)</p> <p>2. Foundation sponsorship: <b>20%</b> (3/15)</p> <p>3. Voluntary donations: <b>26.7%</b> (4/15)</p> <p>4. No industry sponsorship: <b>20%</b> (3/15)</p> <p>5. Insurers: <b>20%</b> (3/15)</p> <p>6. Not-for-profit: <b>26.7%</b> (4/15)</p>                                                               |
| Tao 2017 [18]    | June 1 - August 1, 2016 | N/A | N/A | N/A | Cross-sectional: Survey of Twitter accounts of 634 hematologist-oncologists in the US | Prevalence of COI             | Funded by Laura and John Arnold Foundation                                                                                       | 1/4 reported receiving payments for contributions to Medscape | United States | United States | Twitter                 | Hematology-oncology | English <sup>1</sup> | Hematology-oncology physicians | Financial (general payments and research payments) | Industry                                                                                                           | Open Payments database | <p>▪ <b>79.5%</b> (504/634) of U.S.-based hematologist-oncologists were reported on the Open Payment Database for having at least 1 FCOI</p> <p>▪ Type of COI: General and research payments: 41% (262/634) of hematologist-oncologists<br/>Receiving general payment: 72.4% (459/634) of hematologist-oncologists<br/>Prevalence research payment: 48.4% (307/634) of hematologist-oncologists</p> <p>▪ General payment FCOI: Median \$1,644 (IQR, \$129-\$13,744)</p> <p>▪ Research payment FCOI:</p> |

1  
2  
3  
4  
5  
6  
7  
8  
9  
10  
11  
12  
13  
14  
15  
16  
17  
18  
19  
20  
21  
22  
23  
24  
25  
26  
27  
28  
29  
30  
31  
32  
33  
34  
35  
36  
37  
38  
39  
40  
41  
42  
43  
44  
45  
46  
47  
48  
49  
50  
51  
52  
53  
54  
55  
56  
57  
58  
59  
60

|                |               |                                                         |                |          |                                                                                                                            |                               |      |                                                                                                                                                       |             |              |         |                                                                       |         |                                                                                                                                                                     |               |                      |      |                                                                                                                                                                                                                                                                                                                                            |
|----------------|---------------|---------------------------------------------------------|----------------|----------|----------------------------------------------------------------------------------------------------------------------------|-------------------------------|------|-------------------------------------------------------------------------------------------------------------------------------------------------------|-------------|--------------|---------|-----------------------------------------------------------------------|---------|---------------------------------------------------------------------------------------------------------------------------------------------------------------------|---------------|----------------------|------|--------------------------------------------------------------------------------------------------------------------------------------------------------------------------------------------------------------------------------------------------------------------------------------------------------------------------------------------|
|                |               |                                                         |                |          |                                                                                                                            |                               |      |                                                                                                                                                       |             |              |         |                                                                       |         |                                                                                                                                                                     |               |                      |      | <p>Median \$11,064 (IQR, \$0-\$175164)</p> <p>General payments seemed consistent regardless of the extent of Twitter use, while research payments appeared greatest among those who use Twitter the least</p>                                                                                                                              |
| Toth 2019 [12] | November 2017 | N/A                                                     | N/A            | N/A      | Cross-sectional: Survey of 10 blog posts of nutritionists and registered dietitians in Ontario                             | Prevalence of 'potential' COI | None | 1/5 reported being the chair of the Professional Titles for Dietitians in Ontario Advocacy Group and 5/5 of authors are Ontario registered dietitians | Canada      | Canada       | Blogs   | Detoxification diets                                                  | English | Nutritionists and registered dietitians in Ontario                                                                                                                  | Not specified | Detox diets industry | None | <ul style="list-style-type: none"> <li>▪ <b>80%</b> (4/5) of nutritionist blog posts had a 'potential' COI (i.e., selling a product or service related to detox diets, including selling books, meal plan guides, and products such as juices)</li> <li>▪ <b>None</b> of registered dietitians blog posts had a 'potential' COI</li> </ul> |
| Vu 2021 [26]   | March 2021    | February 2008 (surgery)<br>November 2008 (radiotherapy) | September 2019 | 11 years | Cross-sectional: Survey of 80 YouTube videos on optimal treatment of prostate cancer: surgical therapy versus radiotherapy | Frequency of reporting of COI | None | None                                                                                                                                                  | Switzerland | Not reported | YouTube | Urology oncology: surgical therapy or radiotherapy of prostate cancer | English | Physicians, clinic, hospital or university<br><br>Others: patients, societies (foundations, governmental institutions, academic journals), industry, and news media | Not specified | Not specified        | None | <ul style="list-style-type: none"> <li>▪ <b>10%</b> (surgery) and <b>5%</b> (radiotherapy) of the providers included a disclosure of their conflicts of interest</li> <li>▪ Commercial bias: 15% (surgery videos) and 23% (radiotherapy videos) of the videos contained commercial bias</li> </ul>                                         |

1  
2  
3  
4  
5  
6  
7  
8  
9  
10  
11  
12  
13  
14  
15  
16  
17  
18  
19  
20  
21  
22  
23  
24  
25  
26  
27  
28  
29  
30  
31  
32  
33  
34  
35  
36  
37  
38  
39  
40  
41  
42  
43  
44  
45  
46  
47  
48  
49  
50  
51  
52  
53  
54  
55  
56  
57  
58  
59  
60

|                   |            |          |            |     |                                                                                                                                                                                                                                                     |                   |      |                                                                                                                                                                                                 |               |               |         |                  |         |                                  |           |          |                        |                                                                                                                                                                                                                                                                                                                                                                                                                  |
|-------------------|------------|----------|------------|-----|-----------------------------------------------------------------------------------------------------------------------------------------------------------------------------------------------------------------------------------------------------|-------------------|------|-------------------------------------------------------------------------------------------------------------------------------------------------------------------------------------------------|---------------|---------------|---------|------------------|---------|----------------------------------|-----------|----------|------------------------|------------------------------------------------------------------------------------------------------------------------------------------------------------------------------------------------------------------------------------------------------------------------------------------------------------------------------------------------------------------------------------------------------------------|
| Walradt 2021 [19] | April 2020 | No limit | April 2020 | N/A | Cross-sectional: Survey of 956 tweets by gastroenterologists and surgeons, sharing gastrointestinal (GI) endoscopy videos/images. Selected after identifying those followed by at least 1 major US gastroenterology society and had > 500 followers | Prevalence of COI | None | Potential competing interests: Dr. Berzin is a consultant for Wision AI, Boston Scientific, and Medtronic. All other authors disclosed no financial relationships relevant to this publication. | United States | United States | Twitter | Gastroenterology | English | Gastroenterologists and surgeons | Financial | Industry | Open Payments database | <ul style="list-style-type: none"> <li>▪ <b>37%</b> (7/19) of tweets that mentioned the name of a medical device were posted by a U.S physician who had received a payment (according to OPD) from the manufacturer of the device mentioned.</li> <li>▪ <b>None</b> of the physicians who had received a payment from the manufacturer of the device mentioned disclosed any financial relationships.</li> </ul> |
|-------------------|------------|----------|------------|-----|-----------------------------------------------------------------------------------------------------------------------------------------------------------------------------------------------------------------------------------------------------|-------------------|------|-------------------------------------------------------------------------------------------------------------------------------------------------------------------------------------------------|---------------|---------------|---------|------------------|---------|----------------------------------|-----------|----------|------------------------|------------------------------------------------------------------------------------------------------------------------------------------------------------------------------------------------------------------------------------------------------------------------------------------------------------------------------------------------------------------------------------------------------------------|

<sup>1</sup>Language was assumed based on the country of the individuals posting

#### ABBREVIATIONS:

COI: conflict of interest

FCOI: financial conflict of interest

OPD: Open Payment Database

FOAMed: Free Open Access Medical Education

N/A: Not available

Supplementary file 6: Appraisal of the 17 included studies using Mixed Methods Appraisal Tool.

Mixed Methods Appraisal Tool (MMAT)

| First author   | Year | SCREENING QUESTIONS                     |                                                                    | 4. QUANTITATIVE DESCRIPTIVE STUDIES                                      |                                                             |                                        |                                           |                                                                               |
|----------------|------|-----------------------------------------|--------------------------------------------------------------------|--------------------------------------------------------------------------|-------------------------------------------------------------|----------------------------------------|-------------------------------------------|-------------------------------------------------------------------------------|
|                |      | S1. Are there clear research questions? | S2. Do the collected data allow to address the research questions? | 4.1. Is the sampling strategy relevant to address the research question? | 4.2. Is the sample representative of the target population? | 4.3. Are the measurements appropriate? | 4.4. Is the risk of nonresponse bias low? | 4.5. Is the statistical analysis appropriate to answer the research question? |
| Betschart [21] | 2020 | Yes                                     | Yes                                                                | Yes                                                                      | Yes                                                         | Yes                                    | Yes                                       | Yes                                                                           |
| Chretien [29]  | 2009 | Yes                                     | Yes                                                                | Yes                                                                      | Yes                                                         | Yes                                    | Yes                                       | Yes                                                                           |
| Chretien [20]  | 2011 | Yes                                     | Yes                                                                | Yes                                                                      | Yes                                                         | Yes                                    | Yes                                       | Yes                                                                           |
| Greysen [9]    | 2012 | Yes                                     | Yes                                                                | Yes                                                                      | Yes                                                         | Yes                                    | Yes                                       | Yes                                                                           |
| Hessari [30]   | 2019 | Yes                                     | Yes                                                                | Yes                                                                      | Yes                                                         | Yes                                    | Yes                                       | Yes                                                                           |
| Kaestner [28]  | 2017 | Yes                                     | Yes                                                                | Yes                                                                      | Yes                                                         | Can't tell                             | Yes                                       | Yes                                                                           |
| Lagu [22]      | 2008 | Yes                                     | Yes                                                                | Yes                                                                      | Yes                                                         | Yes                                    | Yes                                       | Yes                                                                           |
| Miller [11]    | 2011 | Yes                                     | Yes                                                                | Yes                                                                      | Yes                                                         | Yes                                    | Yes                                       | Yes                                                                           |
| Niforatos [17] | 2019 | Yes                                     | Yes                                                                | Yes                                                                      | Yes                                                         | Yes                                    | Yes                                       | Yes                                                                           |
| Nishizaki [23] | 2021 | Yes                                     | Yes                                                                | Yes                                                                      | Yes                                                         | Yes                                    | Yes                                       | Yes                                                                           |
| Pratsinis [24] | 2021 | Yes                                     | Yes                                                                | Yes                                                                      | Yes                                                         | Yes                                    | Yes                                       | Yes                                                                           |
| Pratsinis [25] | 2021 | Yes                                     | Yes                                                                | Yes                                                                      | Yes                                                         | Yes                                    | Yes                                       | Yes                                                                           |
| Shrank [27]    | 2011 | Yes                                     | Yes                                                                | Yes                                                                      | Yes                                                         | Yes                                    | Yes                                       | Yes                                                                           |
| Tao [18]       | 2017 | Yes                                     | Yes                                                                | Yes                                                                      | Yes                                                         | Yes                                    | Yes                                       | Yes                                                                           |
| Toth [12]      | 2019 | Yes                                     | Yes                                                                | Yes                                                                      | Yes                                                         | Yes                                    | Yes                                       | Yes                                                                           |
| Vu [26]        | 2021 | Yes                                     | Yes                                                                | Yes                                                                      | Yes                                                         | Yes                                    | Yes                                       | Yes                                                                           |
| Walradt [19]   | 2021 | Yes                                     | Yes                                                                | Yes                                                                      | Yes                                                         | Yes                                    | Yes                                       | Yes                                                                           |

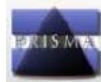

## PRISMA 2020 Checklist

1  
2  
3  
4  
5  
6  
7  
8  
9  
10  
11  
12  
13  
14  
15  
16  
17  
18  
19  
20  
21  
22  
23  
24  
25  
26  
27  
28  
29  
30  
31  
32  
33  
34  
35  
36  
37  
38  
39  
40  
41  
42  
43  
44  
45  
46  
47

| Section and Topic             | Item # | Checklist item                                                                                                                                                                                                                                                                                       | Location where item is reported      |
|-------------------------------|--------|------------------------------------------------------------------------------------------------------------------------------------------------------------------------------------------------------------------------------------------------------------------------------------------------------|--------------------------------------|
| <b>TITLE</b>                  |        |                                                                                                                                                                                                                                                                                                      |                                      |
| Title                         | 1      | Identify the report as a systematic review.                                                                                                                                                                                                                                                          | Page 1                               |
| <b>ABSTRACT</b>               |        |                                                                                                                                                                                                                                                                                                      |                                      |
| Abstract                      | 2      | See the PRISMA 2020 for Abstracts checklist.                                                                                                                                                                                                                                                         | Check PRISMA for abstracts checklist |
| <b>INTRODUCTION</b>           |        |                                                                                                                                                                                                                                                                                                      |                                      |
| Rationale                     | 3      | Describe the rationale for the review in the context of existing knowledge.                                                                                                                                                                                                                          | Page 4                               |
| Objectives                    | 4      | Provide an explicit statement of the objective(s) or question(s) the review addresses.                                                                                                                                                                                                               | Page 4                               |
| <b>METHODS</b>                |        |                                                                                                                                                                                                                                                                                                      |                                      |
| Eligibility criteria          | 5      | Specify the inclusion and exclusion criteria for the review and how studies were grouped for the syntheses.                                                                                                                                                                                          | Pages 5-6                            |
| Information sources           | 6      | Specify all databases, registers, websites, organisations, reference lists and other sources searched or consulted to identify studies. Specify the date when each source was last searched or consulted.                                                                                            | Page 6                               |
| Search strategy               | 7      | Present the full search strategies for all databases, registers and websites, including any filters and limits used.                                                                                                                                                                                 | Supplementary file 2                 |
| Selection process             | 8      | Specify the methods used to decide whether a study met the inclusion criteria of the review, including how many reviewers screened each record and each report retrieved, whether they worked independently, and if applicable, details of automation tools used in the process.                     | Page 6                               |
| Data collection process       | 9      | Specify the methods used to collect data from reports, including how many reviewers collected data from each report, whether they worked independently, any processes for obtaining or confirming data from study investigators, and if applicable, details of automation tools used in the process. | Pages 6-7                            |
| Data items                    | 10a    | List and define all outcomes for which data were sought. Specify whether all results that were compatible with each outcome domain in each study were sought (e.g. for all measures, time points, analyses), and if not, the methods used to decide which results to collect.                        | Pages 5 and 7                        |
|                               | 10b    | List and define all other variables for which data were sought (e.g. participant and intervention characteristics, funding sources). Describe any assumptions made about any missing or unclear information.                                                                                         | Pages 6-7                            |
| Study risk of bias assessment | 11     | Specify the methods used to assess risk of bias in the included studies, including details of the tool(s) used, how many reviewers assessed each study and whether they worked independently, and if applicable, details of automation tools used in the process.                                    | Page 7                               |
| Effect measures               | 12     | Specify for each outcome the effect measure(s) (e.g. risk ratio, mean difference) used in the synthesis or presentation of results.                                                                                                                                                                  | Page 7                               |
| Synthesis methods             | 13a    | Describe the processes used to decide which studies were eligible for each synthesis (e.g. tabulating the study intervention characteristics and comparing against the planned groups for each synthesis (item #5)).                                                                                 | Pages 6-7                            |
|                               | 13b    | Describe any methods required to prepare the data for presentation or synthesis, such as handling of missing summary statistics, or data conversions.                                                                                                                                                | Not applicable                       |
|                               | 13c    | Describe any methods used to tabulate or visually display results of individual studies and syntheses.                                                                                                                                                                                               | Pages 6-7                            |
|                               | 13d    | Describe any methods used to synthesize results and provide a rationale for the choice(s). If meta-analysis was performed, describe the model(s), method(s) to identify the presence and extent of statistical heterogeneity, and software package(s) used.                                          | Pages 6-7                            |
|                               | 13e    | Describe any methods used to explore possible causes of heterogeneity among study results (e.g. subgroup analysis, meta-regression).                                                                                                                                                                 | Not applicable                       |
|                               | 13f    | Describe any sensitivity analyses conducted to assess robustness of the synthesized results.                                                                                                                                                                                                         | Not applicable                       |

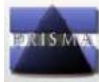

## PRISMA 2020 Checklist

| Section and Topic             | Item # | Checklist item                                                                                                                                                                                                                                                                       | Location where item is reported |
|-------------------------------|--------|--------------------------------------------------------------------------------------------------------------------------------------------------------------------------------------------------------------------------------------------------------------------------------------|---------------------------------|
| Reporting bias assessment     | 14     | Describe any methods used to assess risk of bias due to missing results in a synthesis (arising from reporting biases).                                                                                                                                                              | Not applicable                  |
| Certainty assessment          | 15     | Describe any methods used to assess certainty (or confidence) in the body of evidence for an outcome.                                                                                                                                                                                | Not applicable                  |
| <b>RESULTS</b>                |        |                                                                                                                                                                                                                                                                                      |                                 |
| Study selection               | 16a    | Describe the results of the search and selection process, from the number of records identified in the search to the number of studies included in the review, ideally using a flow diagram.                                                                                         | Page 8                          |
|                               | 16b    | Cite studies that might appear to meet the inclusion criteria, but which were excluded, and explain why they were excluded.                                                                                                                                                          | Supplementary file 4            |
| Study characteristics         | 17     | Cite each included study and present its characteristics.                                                                                                                                                                                                                            | Supplementary file 5            |
| Risk of bias in studies       | 18     | Present assessments of risk of bias for each included study.                                                                                                                                                                                                                         | Supplementary file 6            |
| Results of individual studies | 19     | For all outcomes, present, for each study: (a) summary statistics for each group (where appropriate) and (b) an effect estimate and its precision (e.g. confidence/credible interval), ideally using structured tables or plots.                                                     | Pages 8-15                      |
| Results of syntheses          | 20a    | For each synthesis, briefly summarise the characteristics and risk of bias among contributing studies.                                                                                                                                                                               | Pages 8-15                      |
|                               | 20b    | Present results of all statistical syntheses conducted. If meta-analysis was done, present for each the summary estimate and its precision (e.g. confidence/credible interval) and measures of statistical heterogeneity. If comparing groups, describe the direction of the effect. | Pages 8-15                      |
|                               | 20c    | Present results of all investigations of possible causes of heterogeneity among study results.                                                                                                                                                                                       | Not applicable                  |
|                               | 20d    | Present results of all sensitivity analyses conducted to assess the robustness of the synthesized results.                                                                                                                                                                           | Not applicable                  |
| Reporting biases              | 21     | Present assessments of risk of bias due to missing results (arising from reporting biases) for each synthesis assessed.                                                                                                                                                              | Not applicable                  |
| Certainty of evidence         | 22     | Present assessments of certainty (or confidence) in the body of evidence for each outcome assessed.                                                                                                                                                                                  | Not applicable                  |
| <b>DISCUSSION</b>             |        |                                                                                                                                                                                                                                                                                      |                                 |
| Discussion                    | 23a    | Provide a general interpretation of the results in the context of other evidence.                                                                                                                                                                                                    | Page 15                         |
|                               | 23b    | Discuss any limitations of the evidence included in the review.                                                                                                                                                                                                                      | Pages 15-16                     |
|                               | 23c    | Discuss any limitations of the review processes used.                                                                                                                                                                                                                                | Pages 15-16                     |
|                               | 23d    | Discuss implications of the results for practice, policy, and future research.                                                                                                                                                                                                       | Page 16                         |
| <b>OTHER INFORMATION</b>      |        |                                                                                                                                                                                                                                                                                      |                                 |
| Registration and protocol     | 24a    | Provide registration information for the review, including register name and registration number, or state that the review was not registered.                                                                                                                                       | Page 5                          |
|                               | 24b    | Indicate where the review protocol can be accessed, or state that a protocol was not prepared.                                                                                                                                                                                       | Page 5                          |
|                               | 24c    | Describe and explain any amendments to information provided at registration or in the protocol.                                                                                                                                                                                      | Page 5                          |
| Support                       | 25     | Describe sources of financial or non-financial support for the review, and the role of the funders or sponsors in the review.                                                                                                                                                        | Page 17                         |
| Competing interests           | 26     | Declare any competing interests of review authors.                                                                                                                                                                                                                                   | Page 17                         |

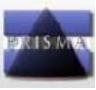

# PRISMA 2020 Checklist

1  
2  
3  
4  
5  
6  
7  
8  
9  
10  
11  
12  
13  
14  
15  
16  
17  
18  
19  
20  
21  
22  
23  
24  
25  
26  
27  
28  
29  
30  
31  
32  
33  
34  
35  
36  
37  
38  
39  
40  
41  
42  
43  
44  
45  
46  
47

| Section and Topic                              | Item # | Checklist item                                                                                                                                                                                                                             | Location where item is reported |
|------------------------------------------------|--------|--------------------------------------------------------------------------------------------------------------------------------------------------------------------------------------------------------------------------------------------|---------------------------------|
| Availability of data, code and other materials | 27     | Report which of the following are publicly available and where they can be found: template data collection forms; data extracted from included studies; data used for all analyses; analytic code; any other materials used in the review. | Page 17                         |

From: Page MJ, McKenzie JE, Bossuyt PM, Boutron I, Hoffmann TC, Mulrow CD, et al. The PRISMA 2020 statement: an updated guideline for reporting systematic reviews. *BMJ* 2021;372:n71. doi: 10.1136/bmj.n71

For more information, visit: <http://www.prisma-statement.org/>

For peer review only

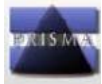

## PRISMA 2020 for Abstracts Checklist

| Section and Topic       | Item # | Checklist item                                                                                                                                                                                                                                                                                        | Reported (Yes/No) |
|-------------------------|--------|-------------------------------------------------------------------------------------------------------------------------------------------------------------------------------------------------------------------------------------------------------------------------------------------------------|-------------------|
| <b>TITLE</b>            |        |                                                                                                                                                                                                                                                                                                       |                   |
| Title                   | 1      | Identify the report as a systematic review.                                                                                                                                                                                                                                                           | Yes               |
| <b>BACKGROUND</b>       |        |                                                                                                                                                                                                                                                                                                       |                   |
| Objectives              | 2      | Provide an explicit statement of the main objective(s) or question(s) the review addresses.                                                                                                                                                                                                           | Yes               |
| <b>METHODS</b>          |        |                                                                                                                                                                                                                                                                                                       |                   |
| Eligibility criteria    | 3      | Specify the inclusion and exclusion criteria for the review.                                                                                                                                                                                                                                          | Yes               |
| Information sources     | 4      | Specify the information sources (e.g. databases, registers) used to identify studies and the date when each was last searched.                                                                                                                                                                        | Yes               |
| Risk of bias            | 5      | Specify the methods used to assess risk of bias in the included studies.                                                                                                                                                                                                                              | Yes               |
| Synthesis of results    | 6      | Specify the methods used to present and synthesise results.                                                                                                                                                                                                                                           | Yes               |
| <b>RESULTS</b>          |        |                                                                                                                                                                                                                                                                                                       |                   |
| Included studies        | 7      | Give the total number of included studies and participants and summarise relevant characteristics of studies.                                                                                                                                                                                         | Yes               |
| Synthesis of results    | 8      | Present results for main outcomes, preferably indicating the number of included studies and participants for each. If meta-analysis was done, report the summary estimate and confidence/credible interval. If comparing groups, indicate the direction of the effect (i.e. which group is favoured). | Yes               |
| <b>DISCUSSION</b>       |        |                                                                                                                                                                                                                                                                                                       |                   |
| Limitations of evidence | 9      | Provide a brief summary of the limitations of the evidence included in the review (e.g. study risk of bias, inconsistency and imprecision).                                                                                                                                                           | Yes               |
| Interpretation          | 10     | Provide a general interpretation of the results and important implications.                                                                                                                                                                                                                           | Yes               |
| <b>OTHER</b>            |        |                                                                                                                                                                                                                                                                                                       |                   |
| Funding                 | 11     | Specify the primary source of funding for the review.                                                                                                                                                                                                                                                 | Yes               |
| Registration            | 12     | Provide the register name and registration number.                                                                                                                                                                                                                                                    | Yes               |

From: Page MJ, McKenzie JE, Bossuyt PM, Boutron I, Hoffmann TC, Mulrow CD, et al. The PRISMA 2020 statement: an updated guideline for reporting systematic reviews. *BMJ* 2021;372:n71. doi: 10.1136/bmj.n71

For more information, visit: <http://www.prisma-statement.org/>



# BMJ Open

## Conflict of interest and funding in health communication on social media: a systematic review

|                                 |                                                                                                                                                                                                                                                                                                                                                                                                                                                                                                                                                                                                                                                                                                                                                                                                                                                                                                                                                                                                                                                                                                                                                                                                                 |
|---------------------------------|-----------------------------------------------------------------------------------------------------------------------------------------------------------------------------------------------------------------------------------------------------------------------------------------------------------------------------------------------------------------------------------------------------------------------------------------------------------------------------------------------------------------------------------------------------------------------------------------------------------------------------------------------------------------------------------------------------------------------------------------------------------------------------------------------------------------------------------------------------------------------------------------------------------------------------------------------------------------------------------------------------------------------------------------------------------------------------------------------------------------------------------------------------------------------------------------------------------------|
| Journal:                        | <i>BMJ Open</i>                                                                                                                                                                                                                                                                                                                                                                                                                                                                                                                                                                                                                                                                                                                                                                                                                                                                                                                                                                                                                                                                                                                                                                                                 |
| Manuscript ID                   | bmjopen-2023-072258.R1                                                                                                                                                                                                                                                                                                                                                                                                                                                                                                                                                                                                                                                                                                                                                                                                                                                                                                                                                                                                                                                                                                                                                                                          |
| Article Type:                   | Original research                                                                                                                                                                                                                                                                                                                                                                                                                                                                                                                                                                                                                                                                                                                                                                                                                                                                                                                                                                                                                                                                                                                                                                                               |
| Date Submitted by the Author:   | 07-Jul-2023                                                                                                                                                                                                                                                                                                                                                                                                                                                                                                                                                                                                                                                                                                                                                                                                                                                                                                                                                                                                                                                                                                                                                                                                     |
| Complete List of Authors:       | <p>Helou, Vanessa; American University of Beirut, Faculty of Medicine<br/> Mouzahem, Fatima; American University of Beirut, Faculty of Health Sciences<br/> Makarem, Adham; American University of Beirut, Faculty of Medicine;<br/> Boston University, School of Public Health<br/> Noueldine, Hussein; Lebanese American University, Gilbert and Rose-Marie Chagoury School of Medicine<br/> El-Khoury, Rayane; American University of Beirut Medical Center, Clinical Research Institute; Weill Cornell Medicine, World Health Organization Collaborating Centre for Disease Epidemiology Analytics on HIV/AIDS, Sexually Transmitted Infections, and Viral Hepatitis<br/> Al Oweini, Dana; American University of Beirut, Faculty of Medicine<br/> Halak, Razan; American University of Beirut, Faculty of Medicine<br/> Hneiny, Layal; American University of Beirut, Saab Medical Library;<br/> University of South Dakota, Wegner Health Sciences Library<br/> Khabza, Joanne; American University of Beirut, Clinical Research Institute<br/> Akl, Elie; American University of Beirut Medical Center, Department of Internal Medicine ; McMaster University, Department of Health Research Methods</p> |
| <b>Primary Subject Heading</b>: | Ethics                                                                                                                                                                                                                                                                                                                                                                                                                                                                                                                                                                                                                                                                                                                                                                                                                                                                                                                                                                                                                                                                                                                                                                                                          |
| Secondary Subject Heading:      | Health policy                                                                                                                                                                                                                                                                                                                                                                                                                                                                                                                                                                                                                                                                                                                                                                                                                                                                                                                                                                                                                                                                                                                                                                                                   |
| Keywords:                       | MEDICAL ETHICS, BIOTECHNOLOGY & BIOINFORMATICS, Health informatics < BIOTECHNOLOGY & BIOINFORMATICS, Health & safety < HEALTH SERVICES ADMINISTRATION & MANAGEMENT                                                                                                                                                                                                                                                                                                                                                                                                                                                                                                                                                                                                                                                                                                                                                                                                                                                                                                                                                                                                                                              |
|                                 |                                                                                                                                                                                                                                                                                                                                                                                                                                                                                                                                                                                                                                                                                                                                                                                                                                                                                                                                                                                                                                                                                                                                                                                                                 |

SCHOLARONE™  
Manuscripts

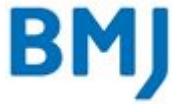

I, the Submitting Author has the right to grant and does grant on behalf of all authors of the Work (as defined in the below author licence), an exclusive licence and/or a non-exclusive licence for contributions from authors who are: i) UK Crown employees; ii) where BMJ has agreed a CC-BY licence shall apply, and/or iii) in accordance with the terms applicable for US Federal Government officers or employees acting as part of their official duties; on a worldwide, perpetual, irrevocable, royalty-free basis to BMJ Publishing Group Ltd ("BMJ") its licensees and where the relevant Journal is co-owned by BMJ to the co-owners of the Journal, to publish the Work in this journal and any other BMJ products and to exploit all rights, as set out in our [licence](#).

The Submitting Author accepts and understands that any supply made under these terms is made by BMJ to the Submitting Author unless you are acting as an employee on behalf of your employer or a postgraduate student of an affiliated institution which is paying any applicable article publishing charge ("APC") for Open Access articles. Where the Submitting Author wishes to make the Work available on an Open Access basis (and intends to pay the relevant APC), the terms of reuse of such Open Access shall be governed by a Creative Commons licence – details of these licences and which [Creative Commons](#) licence will apply to this Work are set out in our licence referred to above.

Other than as permitted in any relevant BMJ Author's Self Archiving Policies, I confirm this Work has not been accepted for publication elsewhere, is not being considered for publication elsewhere and does not duplicate material already published. I confirm all authors consent to publication of this Work and authorise the granting of this licence.

## **Conflict of interest and funding in health communication on social media: a systematic review**

Vanessa Helou<sup>1</sup>, Fatima Mouzahem<sup>2</sup>, Adham Makarem<sup>1,3</sup>, Hussein A. Noureldine<sup>4</sup>, Rayane El Khoury<sup>5,6</sup>, Dana Al Oweini<sup>1</sup>, Razan Halak<sup>1</sup>, Layal Hneiny<sup>7</sup>, Joanne Khabsa<sup>5</sup>, Elie A. Akl<sup>8,9</sup>

<sup>1</sup>Faculty of Medicine, American University of Beirut, Beirut, Lebanon

<sup>2</sup>Faculty of Health Sciences, American University of Beirut, Beirut, Lebanon

<sup>3</sup>School of Public Health, Boston University, Boston, Massachusetts, USA

<sup>4</sup>LAU Gilbert and Rose-Marie Chaghoury School of Medicine, Lebanese American University, Byblos, Lebanon

<sup>5</sup>Clinical Research Institute, American University of Beirut Medical Center, Beirut, Lebanon

<sup>6</sup>Infectious Disease Epidemiology Group & World Health Organization Collaborating Centre for Disease Epidemiology Analytics on HIV/AIDS, Sexually Transmitted Infections, and Viral Hepatitis, Weill Cornell Medicine, Doha, Qatar

<sup>7</sup>Wegner Health Sciences Library, University of South Dakota, Sioux Falls, USA & Saab Medical Library, University Libraries, American University of Beirut, Beirut, Lebanon

<sup>8</sup>Department of Health Research Methods, Evidence, and Impact (HEI), McMaster University, Canada

<sup>9</sup>Department of Internal Medicine, American University of Beirut Medical Center, Beirut, Lebanon

### **Corresponding author:**

Elie A. Akl, MD, MPH, PhD

Department of Internal Medicine, American University of Beirut Medical Center

P.O. Box: 11-0236, Riad-El-Solh Beirut 1107 2020

Beirut – Lebanon

Phone: 00961 1 374374; Email: [ea32@aub.edu.lb](mailto:ea32@aub.edu.lb)

**Word count:** 2905

**Keywords:** conflict of interest, disclosure, funding and social media

## ABSTRACT

**Objectives:** To synthesize the available evidence on the reporting of conflicts of interest (COI) by individuals posting health messages on social media, and on the reporting of funding sources of studies cited in health messages on social media.

**Data Sources:** Medline (OVID) (2005-March 2022), Embase (2005-March 2022) and Google Scholar (2005-August 2022), supplemented with a review of reference lists and forward citation tracking.

**Design:** Reviewers selected eligible studies and abstracted data in duplicate and independently. We appraised the quality of the included studies using the Mixed Methods Appraisal Tool. We summarized the results in both narrative and tabular formats. We followed the PRISMA 2020 checklist for reporting our study.

**Results:** Of a total of 16,645 retrieved citations, we included 17 eligible studies. The frequency of reporting of conflicts of interest varied between 0% and 60%, but it was mostly low. In addition, a significant proportion, ranging between 15-80%, of healthcare professionals using social media have financial relationships with industry. However, three studies assessed the proportion of conflicts of interest of physicians identified through Open Payment Database (OPD) but not reported by the authors. It was found that 98.7-100% of these relationships with industry are not reported when communicating health-related information. Also, two studies showed that there is evidence of a potential association between COI and the content of posting. No data was found on the reporting of funding sources of studies cited in health messages on social media.

**Conclusions:** While a significant proportion of healthcare professionals using social media have financial relationships with industry, lack of reporting on COI and undisclosed COI are common. We did not find studies on the reporting of funding sources of studies cited in health messages on social media.

**Funding:** none

**Registration:** [dx.doi.org/10.17504/protocols.io.5jyl8jj4rg2w/v1](http://dx.doi.org/10.17504/protocols.io.5jyl8jj4rg2w/v1)

## ARTICLE SUMMARY

### Strengths and limitations of this study

- This is the first systematic review on the subject of reporting of conflicts of interest in social media.
- The study applied standard methodology for conducting systematic reviews (including a comprehensive search, duplicate screening, and data abstraction).
- We found a relatively limited number of eligible studies.
- Meta-analysis was not conducted due to heterogeneity of the included studies.

## INTRODUCTION

The traditional internet has expanded to a more dynamic and interactive entity referred to as “Web 2.0” [1]. Web 2.0 allows its users to create and share content as well as communicate and interact with other users [1]. It differs from Web 1.0 in that content and applications of the web are no longer necessarily created by specific individuals but by all internet users, and constantly modified by them [2]. It includes various social media platforms such as blogs, Twitter, Facebook, Instagram, and YouTube [1].

Many individuals rely on the internet to answer their medical questions. While 90% of health care professionals use social media platforms for personal purposes, 65% use them for professional reasons such as promotion of health behaviors, discussions of health care policy, communicating with colleagues, and education of patients, peers, and students [3]. Within recent years, the use of social media by health care professionals has increased significantly with some estimates reporting increases from 42% in 2010 to as high as 90% in 2011 [4].

However, professionals may have conflicts of interest (COI) that may bias their postings on their platforms [4]. In general, conflicts of interest can be either individual or institutional, financial or non-financial.[5] While financial COI entail receiving grants, personal fees, trips, honoraria or stock ownership, non-financial COI include career advancement, political or ideological beliefs, strong scientific opinions, fame, and social interests.

Reporting COIs allow their acknowledgment and incorporation in the public’s interpretation of information posted on social media [4]. That in turn should enhance public trust in the medical profession. Many medical associations have developed guidelines on physicians’ use of social media, including reporting of COI [6-9]. However, there are many unique challenges to reporting and managing COI on social media. These challenges arise from the characteristics of social media, such as the rapid spread of information, user-generated content, and character limitation [4]. Users may share products or services with which they may have financial or non-financial interest, without disclosing their conflicts. This blurring of boundaries between personal opinions, professional advice, and undisclosed relationships can mislead the public and compromise the credibility of health communication.

Very limited research has been done on the topic of conflicts of interest and funding in social media. Previous studies considered COI reporting as part of measures of online professionalism [10], or as an indicator to assess credibility and quality of online information [11-14]. McCarthy et al discussed the urgent need for “more research examining the prevalence, impact of physicians’ COI on social media content, and appropriate management strategies” [4].

The objective of this study is to synthesize the available evidence on the reporting of conflicts of interest by individuals posting health messages on social media, and on the reporting of funding sources of studies cited in health messages on social media.

## METHODS

### Design overview and definitions

We conducted a systematic review of the published peer reviewed literature. We have followed Akl et al. framework for defining, categorizing, and assessing conflicts of interest in health research [5]. We referred to the following definition of COI: “a COI exists when a past, current, or expected interest creates a significant risk of inappropriately influencing an individual’s judgment, decision, or action when carrying out a specific duty” [5].

We considered COI as a concept relevant to a social media account of an individual or an organization (which would include the funding by a specific organization). We considered funding as a concept relevant to a research study or project.

Table 1 shows the terms used for different scenarios that vary by whether COI exists or not, and whether a COI reporting statement is available.

**Table 1** Problems associated with scenarios varying by whether COI exists or not, and whether a COI reporting statement is available.

|                               | No COI exists                            | COI exists                             |
|-------------------------------|------------------------------------------|----------------------------------------|
| No statement reporting on COI | Lack of reporting but no undisclosed COI | Lack of reporting with undisclosed COI |
| Statement reporting no COI    | No problem                               | Undisclosed COI                        |
| Statement reporting COI       | Over-reporting of COI                    | No problem                             |

We used the following definition of social media: “a group of applications which is based on ideological and technological foundations of Web 2.0 that allows the creation and exchange of user-generated content” [1].

We developed and published a detailed protocol for this review on protocols.io [15], (included in *supplementary file 1*). We followed the PRISMA 2020 checklist to report our study [16].

### Eligibility criteria

We included articles that meet the following eligibility criteria:

- Topic: conflict of interest on social media or funding;

- Type of social media: all platforms that fit the Web 2.0 definition, including blogs, Facebook, Instagram, Twitter, LinkedIn, and YouTube;
- Field: health field, including clinical, health systems and policy, public health and biomedical sciences;
- Study design: any primary study including surveys, research letters, and qualitative studies. We excluded editorials, abstracts, letters to the editor, reviews, and opinion pieces;
- Date of publication: 2005 to current (2005 being the year of the rise of Web 2.0);
- Language: any language.

### Search strategy

We searched Medline(OVID) (2005-March 2022), Embase (2005-March 2022) and Google Scholar (2005-August 2022). The search strategies included both keywords and medical subject headings (MeSH terms) relevant to the concepts of conflict of interest, funding, and social media. We developed the search strategies with the help of an experienced librarian and included them in the supplementary file (*supplementary file 2*). We conducted our search in the databases with no restrictions on the language. We restricted the search by year (2005 and beyond). In addition, we screened the reference lists of included studies and forward searched for publications citing these included studies via Google Scholar.

### Study selection

Teams of two reviewers screened in duplicate and independently the titles and abstracts of citations identified by the search using Rayyan screening tool. We retrieved the full texts of citations judged as potentially eligible by at least one reviewer. Reviewers subsequently screened the full texts in duplicate and independently. They resolved any disagreement by discussion or with the help of a third reviewer when consensus could not be reached. We used standardized and pilot-tested screening tools. We recorded the reasons for exclusion and summarized the results of the selection process using the 2020 PRISMA flow diagram [16]. The reviewers conducted calibration exercises before the screening process.

### Data collection process

We developed a standardized and pilot-tested data extraction form with detailed instructions. Two teams of two reviewers abstracted the data from eligible studies independently and in duplicate using a standardized pilot tested form. The reviewers completed calibration exercises before starting the data collection process. They resolved any disagreements by discussion between the two reviewers or with the help of the principal investigator.



We extracted the following variables into a Word document:

1. General characteristics of the study:
  - Type of healthcare professionals: physicians, nurses, or other;
  - Year of conduct;
  - Study design;
  - Funding of the study;
  - COI of study authors;
  - Country of study authors
2. Social media:
  - Type: e.g., Facebook, twitter, Instagram, YouTube, LinkedIn;
  - Number of posts, videos, or blogs assessed;
  - Language of posts, videos, or blogs;
  - Country of the subjects of study;
  - Topic focus of the study, if any.
3. Conflicts of interest:
  - Type of conflict of interest;
  - Subject of conflict of interest;
  - Source of conflict of interest;
  - Tools used to assess the presence of financial relationships;
  - Prevalence of conflict of interest, verified or suspected;
  - Frequency of reporting of conflict of interest;
  - Proportion of undisclosed conflict of interest;
  - Proportion of organizations reporting undisclosed conflict of interest;
  - Association between conflict of interest and post content.
4. Funding:
  - Source of funding;
  - Amount of funding;
  - Role of funder.

### **Quality assessment and data synthesis**

A team of two reviewers assessed independently the quality assessment of included studies using the Mixed Methods Appraisal Tool. This tool is designed for the appraisal stage of systematic

reviews that include qualitative, quantitative, or mixed methods studies [17]. Due to the nature of the data, we report the results in narrative and tabular formats.

## Patient and public involvement

We did not involve patients or the public in the design, conduct, reporting, or dissemination plans of our research.

## RESULTS

### Study selection

The PRISMA flowchart (*supplementary file 3*) depicts the study selection process. We excluded 198 studies at the full text screening stage for the following reasons: not about conflicts of interest or funding (n=116), not about social media (n=33), and not the study design of interest (n=66) (*supplementary file 4*). We judged 17 studies to be eligible.

### General characteristics

All of 17 included studies were cross-sectional and reported quantitative data. Table 2 shows the remaining general characteristics of these studies. The majority of studies were survey of social media posts (88%), had the United States or Canada as the country of the study subjects (53%), focused on posts in English language (88%), and focused on a specific health specialty (71%). The median year of posts upload date was 2018. The social media most assessed were Twitter (29%), YouTube videos (29%), and blogs (29%).

**Table 2** General characteristics of included studies (N=17)

|                                   | n (%)     |
|-----------------------------------|-----------|
| <b>Study design</b>               |           |
| Survey of posts                   | 13 (76%)  |
| Median sample size (IQR)          | 159 (879) |
| Survey of individuals or accounts | 4 (24%)   |
| Median sample size (IQR)          | 117 (205) |
| <b>Funding of the study</b>       |           |

|                                                     |          |
|-----------------------------------------------------|----------|
| Funded                                              | 4 (24%)  |
| Not funded                                          | 6 (35%)  |
| Not reported                                        | 7 (41%)  |
| <b>Conflict of interest of study authors</b>        |          |
| Conflict of interest reported                       | 5 (29%)  |
| No conflict of interest                             | 11 (65%) |
| Not reported                                        | 1 (6%)   |
| <b>Study focused on a specific health specialty</b> | 12 (71%) |
| <b>Type of social media</b>                         |          |
| Twitter                                             | 5 (29%)  |
| Blogs                                               | 5 (29%)  |
| YouTube                                             | 5 (29%)  |
| Not specified                                       | 2 (12%)  |
| <b>Language of posts<sup>§</sup></b>                |          |
| English                                             | 15 (88%) |
| Other languages                                     | 4 (24%)  |
| No language restriction                             | 1 (6%)   |
| <b>Time period covered</b>                          |          |
| ≤1 year                                             | 4 (24%)  |
| 11-12 years                                         | 4 (24%)  |
| Not specified                                       | 9 (53%)  |
| <b>Median year of post date (IQR)</b>               | 2018 (3) |
| <b>Country of the subjects of study<sup>§</sup></b> |          |
| United States of America                            | 7 (41%)  |
| Canada                                              | 2 (12%)  |

|                                                       |         |
|-------------------------------------------------------|---------|
| Europe                                                | 2 (12%) |
| Asia                                                  | 2 (12%) |
| United Kingdom                                        | 1 (6%)  |
| Australia                                             | 2 (12%) |
| Not reported                                          | 6 (35%) |
| No restrictions to countries                          | 1 (6%)  |
| <b>Outcome<sup>§</sup></b>                            |         |
| Prevalence of COI                                     | 5 (29%) |
| Frequency of reporting of COI                         | 8 (47%) |
| Proportion of undisclosed COI                         | 3 (18%) |
| Proportion of organizations reporting undisclosed COI | 2 (12%) |
| Association between COI and post content              | 2 (12%) |

<sup>§</sup> Some studies included more than one language, country, or outcome

Table 3 shows the characteristics of COI in health communication on social media in the included studies. The majority of the studies had physicians as their study population (76%), specified industry as the source of COI (65%), and did not specify the type (whether financial or non-financial) of COI studied (59%).

**Table 3** Characteristics of COI in health communication on social media assessed in the included studies (N= 17)

|                                      | n (%)    |
|--------------------------------------|----------|
| <b>Subjects of COI</b>               |          |
| Physicians                           | 13 (76%) |
| Medical students                     | 1 (6%)   |
| University                           | 4 (24%)  |
| Healthcare entity (hospital, clinic) | 4 (24%)  |

|                      |          |
|----------------------|----------|
| Others <sup>◊</sup>  | 9 (53%)  |
| <b>Source of COI</b> |          |
| Industry             | 11 (65%) |
| Others <sup>◊</sup>  | 2 (12%)  |
| Not specified        | 6 (35%)  |
| <b>Types of COI</b>  |          |
| Financial            | 7 (41%)  |
| Not specified        | 10 (59%) |

<sup>◊</sup>Others: non-physician health professionals (nurses, dietitians, nutritionists, pharmacists, chiropractors, acupuncturists), patients, societies/organizations (foundations, governmental institutions, academic journals), industry, news media, and bloggers.

<sup>◊</sup> Others: Volunteer donation, foundation, insurer, not-for-profit, webhost, or corporation entity.

## Findings

We did not find evidence on the reporting of funding sources of studies cited in health messages on social media. With regards to COI reporting, the included studies assessed one or more of the following 5 outcomes: (1) prevalence of COI, verified or suspected (n=5); (2) frequency of reporting of COI (n=8); (3) proportion of undisclosed COI (n=3); (4) proportion of organizations reporting undisclosed COI (n=2); and (5) association between COI and post content (n=2). We provide the full details in supplementary file 5 and summarize them narratively in the following paragraphs. Supplementary file 6 includes the results of the quality assessment of the included studies. No major concerns were noted, except unclear appropriate measurements for 11 out of the 17 included studies.

### Prevalence of COI, verified or suspected

Table 4 presents the results from five studies on the prevalence of COI. The prevalence of verified COI (using Open Payment Database) ranged between 15% and 80%. The prevalence of suspected COI (based on authors' judgement) ranged between 0% and 80%.

**Table 4** Results from five studies on the prevalence of COI

| Study                  | Social Media | Health condition              | Prevalence of COI<br>(n of authors with<br>COI / N total<br>authors)                                                                                              |
|------------------------|--------------|-------------------------------|-------------------------------------------------------------------------------------------------------------------------------------------------------------------|
| <i>Verified</i>        |              |                               |                                                                                                                                                                   |
| Niforatos 2019<br>[18] | Blogs        | Emergency<br>medicine         | <b>15.4%</b> (45/292)<br>of U.S-based<br>healthcare<br>providers                                                                                                  |
| Tao 2017 [19]          | Twitter      | Hematology-<br>oncology       | <b>79.5%</b> (504/634)<br>of U.S-based<br>hematologist-<br>oncologists                                                                                            |
| Walradt 2021<br>[20]   | Twitter      | Gastrointestinal<br>endoscopy | <b>37%</b> (7/19) of<br>tweets that<br>mentioned the<br>name of a medical<br>device were<br>posted by a U.S<br>physician who had<br>received a<br>payment         |
| <i>Suspected</i>       |              |                               |                                                                                                                                                                   |
| Toth 2019 [13]         | Blogs        | Detox<br>diets industry       | <b>80%</b> (4/5) of<br>nutritionist blog<br>posts had a<br>'potential' COI<br><br><b>None</b> of registered<br>dietitians' blog<br>posts had a<br>'potential' COI |
| Chretien 2011<br>[21]  | Twitter      | General                       | <b>0.2%</b> (12/5156)<br>of tweets involved<br>'possible'<br>conflicts of<br>interest                                                                             |

### Frequency of reporting COI

Table 5 presents the results of eight studies on the frequency of COI reporting. The frequency ranged from 0% to 60%. It was not clear from any of the studies whether the percentage referred

to the number of COI statements (whether reporting the existing or not of COI) or to the number of statements reporting a COI.

**Table 5** Results from eight studies on the frequency of reporting COI

| Study                | Social Media                                 | Health condition                                                                     | Frequency (n of posts reporting COI / N total posts)                            |
|----------------------|----------------------------------------------|--------------------------------------------------------------------------------------|---------------------------------------------------------------------------------|
| Betschart 2020 [22]  | YouTube                                      | Treatment options for lower urinary tract symptoms with benign prostatic hyperplasia | <b>2%</b> (2/159) (COI reporting)                                               |
| Lagu 2008 [23]       | Blogs                                        | General                                                                              | <b>0%</b> (0/271) (COI reporting)                                               |
| Nishizaki 2021 [24]  | Japanese YouTube videos                      | Pediatrics: nocturnal enuresis                                                       | <b>0%</b> (0/72) (COI reporting)                                                |
| Pratsinis 2021 [25]  | YouTube                                      | Treatment options of urinary stones                                                  | <b>9%</b> (9/100) (COI reporting)                                               |
| Pratsinis, 2021 [26] | YouTube                                      | Benign prostatic hyperplasia, prostate cancer, and urinary stone disease             | “Majority” did not have COI disclosure<br>Estimated: 46/240 (COI reporting)     |
| Vu 2021 [27]         | YouTube                                      | Treatment of prostate cancer: surgical therapy versus radiotherapy                   | <b>10%</b> (surgery) and <b>5%</b> (radiotherapy) (COI reporting)               |
| Miller 2011 [12]     | Blogs                                        | General                                                                              | <b>15.6%</b> (148/951) of health blogs reported sponsorship                     |
| Shrank 2011 [28]     | Social networking sites (93% featured blogs) | Diabetes information                                                                 | 1. Industry sponsorship:<br>- Pharmaceutical manufacturers: <b>53.3%</b> (8/15) |



|  |  |  |                                                                                                                                                                                                                                                                                                                                                                                                                                                             |
|--|--|--|-------------------------------------------------------------------------------------------------------------------------------------------------------------------------------------------------------------------------------------------------------------------------------------------------------------------------------------------------------------------------------------------------------------------------------------------------------------|
|  |  |  | <ul style="list-style-type: none"> <li>- Diabetes device manufacturers: <b>60%</b> (9/15)</li> <li>- Webhost Sponsorship: <b>13.3%</b> (2/15)</li> </ul> <ol style="list-style-type: none"> <li>2. Foundation sponsorship: <b>20%</b> (3/15)</li> <li>3. Voluntary donations: <b>26.7%</b> (4/15)</li> <li>4. No industry sponsorship: <b>20%</b> (3/15)</li> <li>5. Insurers: <b>20%</b> (3/15)</li> <li>6. Not-for-profit: <b>26.7%</b> (4/15)</li> </ol> |
|--|--|--|-------------------------------------------------------------------------------------------------------------------------------------------------------------------------------------------------------------------------------------------------------------------------------------------------------------------------------------------------------------------------------------------------------------------------------------------------------------|

### Proportion of undisclosed COI

We identified three studies reporting on the proportion of undisclosed COI. The proportion values were 99%, 100%, and 100% [18, 20, 29]. All three studies assessed the proportion of COI identified through Open Payment Database but not reported by the authors. It was not clear from any of the studies whether the proportion referred to those who reported no COI or those who had no COI statement.

### Proportion of organizations reporting undisclosed COI

We identified two studies on the proportion of organizations reporting undisclosed COI. Chretien et al. [30] surveyed 130 deans of student affairs from institutions in the Association of American Medical Colleges. Out of the 78 deans who responded, 3% (2/78) reported unprofessional incidents related to product endorsement without reporting COI.

Greysen et al. [10] surveyed 48 executive directors of state medical boards about US-based physicians' violations of online professionalism. An estimated percentage of 56% indicated that they received reports of violations related to "failure to reveal conflicts of interest online".

## Association between COI and content of posting

We identified two studies on the association between COI and the content of posting. Kaestner et al.[29] analyzed tweets of 156 US-based hematologist-oncologists on oncology drugs; they also verified the physicians' financial conflicts of interest using Open Payments Database. The authors found that tweets were more likely to be positive ( $p=0.02$ ) when they related to drugs from a company for which they had a financial COI compared with drugs from a company for which they did not have a financial COI.

Hessari et al.[31] assessed 1156 tweets of alcohol industry-funded organizations and 1649 tweets of non- alcohol industry-funded charities, with all entities aiming to raise alcohol awareness. While 10.1% ( $n=166/1649$ ) of the non- alcohol industry-funded organizations tweets mentioned alcohol marketing, advertising, sponsorship, issues related to alcohol pricing and physical health harms, none ( $n=0/1156$ ) of the alcohol industry -funded organizations tweets mentioned those topics.

## DISCUSSION

### Summary of evidence

We systematically reviewed the literature for the reporting of COI by individuals posting health messages on social media, and on the reporting of funding sources of studies cited in health messages on social media. The frequency of reporting of COI varied across studies but was mostly low (less than 15%). A significant proportion of healthcare professionals using social media have financial relationships with industry (up to 80%). However, most of these relationships are not reported when communicating health-related information. Also, there is evidence of a potential association between COI and the content of posting. We did not find studies on the reporting of funding sources of studies cited in health messages on social media.

### Strengths and limitations

To the best of our knowledge, this is the first systematic review about conflicts of interest and funding in social media. We have applied standard methodology based on the principles of conducting systematic reviews (including a comprehensive search, duplicate screening, data abstraction and quality appraisal).

Unfortunately, a limited number of studies have addressed the topic of reporting of conflicts of interest in social media, and none has explored the reporting of funding of studies cited in health messages on social media. In addition, the included studies were heterogeneous in terms of study designs and outcomes reported, which prevented us from conducting a more advanced synthesis.

Two of the included studies found an association between COI and the content of social media posting. However, it is not clear whether the relationship is causal, i.e., having it is the COI that leads to a specific point of view.

## Implications for practice and research

Our findings are of high importance with the increasing reliance of patients and the public on social media as a source of information and medical advice. Furthermore, there is evidence that the use of social media increases significantly during natural hazard and crises. [32]. This is particularly relevant to the COVID-19 information shared with the public on novel therapeutic agents which may have harmful side effects [33].

This is particularly important, considering our definition of COI. Indeed, the specific duty for individuals posting on social media (particularly professional figures with high number of followers) is to provide accurate and reliable information. This is extremely important given the potential impact on both clinical and public health decisions. Having conflicts of interests, whether financial or non-financial, poses a significant risk of biasing the opinions of individuals sharing their opinions on social media, leading to either misinformation or disinformation.

Given the above, reporting conflict of interest and funding on social media is a basic requirement for the responsible use of social media, particularly during crises (such as the COVID-19 pandemic) associated with infodemics, misinformation and disinformation [34].

Healthcare professionals should be encouraged to disclose their conflicts of interest when sharing health-related content by referring to existing guidelines on physicians' use of social media [6-9]. When using social media platforms with character limits such as Twitter, it is recommended to include a disclosure of interests by incorporating an electronic hyperlink to a standardized disclosure form, such as the one provided by the International Committee of Medical Journal Editors (<https://www.icmje.org/disclosure-of-interest/>). Alternatively, healthcare professionals can include a link to public reporting tools such as Center for Medicare and Medicaid Open Payments [4].

In addition, clear guidance and policies are needed for the reporting of COI and funding by health care professionals when using social media. Such policies can be developed through a collaboration between regulatory entities, professional organizations, and social media platforms. Healthcare providers can refer to published guidance on the reporting of funding [35]. In addition, improving public media literacy is essential to help users identify potential conflicts in health information and make informed decisions.

Future research should explore the impact of COI in social media on the perceptions, beliefs, and behaviors of their users. Despite the extent of misinformation, and disinformation on social media during the COVID-19 pandemic [36], no study has assessed the prevalence of COI in that context. Interestingly, one study found a correlation between the amounts received by academic infectious diseases physicians from Gilead Sciences, producer of remdesivir, and their public opposition to the use of hydroxychloroquine [37]. Therefore, it would be important to explore the prevalence of COI in that context and the relationship between COI, misinformation, and disinformation. From

1  
2  
3 a methodological point of view, future studies should clearly distinguish between the absence of a  
4 COI statement and a statement of absence of COI.  
5

6 Two crucial aspects that were outside the scope of this study, but deserve further consideration are  
7 the reporting of funding by the media and scientific journals and the declaration of interests by  
8 their editors [38]. Funding by, and financial relationships with pharmaceutical companies and  
9 other for-profit entities, have the potential to bias the information shared through media and  
10 journals publications. Indeed, a recent survey found that an extremely low percentage of peer  
11 reviewers and journals editors addressed study funding and authors' COI [39]. Also, the study  
12 found that peer reviewers and journal editors rarely declared their COI, or commented on their  
13 own or on each other's COI.  
14  
15  
16  
17  
18  
19  
20  
21  
22  
23  
24  
25  
26  
27  
28  
29  
30  
31  
32  
33  
34  
35  
36  
37  
38  
39  
40  
41  
42  
43  
44  
45  
46  
47  
48  
49  
50  
51  
52  
53  
54  
55  
56  
57  
58  
59  
60

## DECLERATIONS

### Authors Contributions

EAA conceived and designed the study. VH and FM coordinated various parts of the study. EAA had full access to all the data in the study and takes responsibility for the integrity and accuracy of the data analysis. LH, VH and FM designed the search strategy. FM and RAK ran the search and VH later updated it. VH, FM, JK, HN, AM, RAK, DAO, and RH contributed to the study selection process. VH, FM, AM, HN, and JK extracted the data. VH and FM analyzed the data. VH, FM, JK, and EAA interpreted the data. FM wrote the first draft of the manuscript with EAA; VH worked on subsequent drafts with JK and EAA. All authors critically revised the manuscript and approved the final manuscript.

### Ethics and dissemination

This systematic review did not involve human research participants, and therefore does not require ethical approval.

### Patient Consent

Patient consent is not applicable.

### Transparency

EAA affirms that this manuscript is an honest, accurate, and transparent account of the study being reported, that no important aspects of the study have been omitted and that any discrepancies from the planned study have been explained.

### Funding

This research received no specific grant from any funding agency in the public, commercial or not-for-profit sectors.

### Conflict of interest

EAA and JK have conducted studies on the topics of conflicts of interest and funding.

### Data availability statement

All data relevant to the study are included in the article or uploaded as supplementary information.

## SUPPLEMENTARY MATERIAL

**Supplementary file 1:** Systematic review protocol.

**Supplementary file 2:** Search strategies used in Medline(OVID), Embase and Google Scholar.

**Supplementary file 3:** PRISMA flow diagram for systematic reviews.

**Supplementary file 4:** Excluded studies in full-text screening with their corresponding reasons of exclusion.

**Supplementary file 5:** Characteristics of the 17 included studies.

**Supplementary file 6:** Appraisal of the 17 included studies using Mixed Methods Appraisal Tool.

## ABBREVIATIONS

COI: conflicts of interest

PRISMA: Preferred Reporting Items for Systematic Reviews and Meta-Analyses

COVID-19: Corona Virus Disease 2019

OPD: Open Payment Database

## REFERENCES

1. Omurtag K, Turek P. Incorporating social media into practice: A blueprint for reproductive health providers. *Clinical Obstetrics and Gynecology*. 2013;56(3):463-70.
2. Kaplan AM, Haenlein M. Users of the world, unite! The challenges and opportunities of Social Media. *Business horizons*. 2010;53(1):59-68.
3. TenBarge AM, Riggins JL. Responding to Unsolicited Medical Requests from Health Care Professionals on Pharmaceutical Industry-Owned Social Media Sites: Three Pilot Studies. *Journal of medical Internet research*. 2018;20(10):e285-e.
4. McCarthy CP, DeCamp M, McEvoy JW. Social Media and Physician Conflict of Interest. *American Journal of Medicine*. 2018;131(8):859-60.
5. Akl EA, Hakoum M, Khamis A, Khabisa J, Vassar M, Guyatt G. A framework is proposed for defining, categorizing, and assessing conflicts of interest in health research. *Journal of clinical epidemiology*. 2022.
6. Borgmann H, Cooperberg M, Murphy D, Loeb S, N'Dow J, Ribal MJ, et al. Online Professionalism—2018 Update of European Association of Urology (@Uroweb) Recommendations on the Appropriate Use of Social Media. *European urology*. 2018;74(5):644-50.
7. Farnan JM, Sulmasy LS, Worster BK, Chaudhry HJ, Rhyne JA, Arora VM, et al. Online medical professionalism: Patient and public relationships: Policy statement from the American College of physicians and the federation of State Medical Boards. *Annals of internal medicine*. 2013;158(8):620-7.
8. Shore R, Halsey J, Shah K, Crigger B-F, Douglas SP, Ethical AMACo, et al. Report of the AMA council on ethical and judicial affairs: Professionalism in the use of social media. *The Journal of clinical ethics*. 2011;22(2):165-72.
9. Social Media and Electronic Communications: Report and Recommendations of the FSMB Ethics and Professionalism Committee Federation of State Medical Boards 2019 [Available from: <https://www.fsmb.org/siteassets/advocacy/policies/social-media-and-electronic-communications.pdf>].
10. Greysen SR, Chretien KC, Kind T, Young A, Gross CP. Physician violations of online professionalism and disciplinary actions: a national survey of state medical boards. *Jama*. 2012;307(11):1141-2.
11. Zhang MW, Ho RC, Loh A, Wing T, Wynne O, Chan SWC, et al. Current status of postnatal depression smartphone applications available on application stores: an information quality analysis. *BMJ Open*. 2017;7(11):e015655.
12. Miller EA, Pole A, Bateman C. Variation in Health Blog Features and Elements by Gender, Occupation, and Perspective. *Journal of health communication*. 2011;16(7):726-49.
13. Toth J, O'Connor C, Hartman B, Dworatzek P, Horne J. "Detoxify or Die": Qualitative Assessments of Ontario Nutritionists' and Dietitians' Blog Posts Related to Detoxification Diets. *Canadian journal of dietetic practice and research*. 2019;80(3):116-21.
14. Wagner L, Paquin R, Persky S. Genetics blogs as a public health tool: Assessing credibility and influence. *Public Health Genomics*. 2012;15(3-4):218-25.
15. Vanessa Helou FM, Hussein A. Noureldine, Adham Makarem, Rayane Al Khoury, Dana Al Oweini, Razan Halak, Layal Hneiny, Joanne Khabisa, Elie A Akl. Conflict of interest and funding in health communication on social media: a systematic review. 2022.
16. Page MJ, McKenzie JE, Bossuyt PM, Boutron I, Hoffmann TC, Mulrow CD, et al. The PRISMA 2020 statement: An updated guideline for reporting systematic reviews. *Journal of clinical epidemiology*. 2021;134:178-89.
17. Hong QN, Fàbregues S, Bartlett G, Boardman F, Cargo M, Dagenais P, et al. The Mixed Methods Appraisal Tool (MMAT) Version 2018 for Information Professionals and Researchers. *Education for information*. 2018;34(4):285-91.



18. Niforatos JD, Lin L, Narang J, James A, Singletary A, Rose E, et al. Financial Conflicts of Interest Among Emergency Medicine Contributors on Free Open Access Medical Education (FOAMed). *Academic emergency medicine*. 2019;26(7):814-7.
19. Tao DL, Boothby A, McLouth J, Prasad V. Financial Conflicts of Interest Among Hematologist-Oncologists on Twitter. *JAMA internal medicine*. 2017;177(3):425-7.
20. Walradt T, Bilal M, Wadhwa V, Chiang AL, Berzin TM. Confidentiality and Conflicts of Interest: An Assessment of Twitter Posts in Gastrointestinal Endoscopy. *The American journal of gastroenterology*. 2021;116(7):1542-4.
21. Chretien KC, Azar J, Kind T. Physicians on Twitter. *JAMA : the journal of the American Medical Association*. 2011;305(6):566-8.
22. Betschart P, Pratsinis M, Müllhaupt G, Rechner R, Herrmann TRW, Gratzke C, et al. Information on surgical treatment of benign prostatic hyperplasia on YouTube is highly biased and misleading. *BJU international*. 2020;125(4):595-601.
23. Lagu T. Content of weblogs written by health professionals. New York: Aspen Publishers, Inc; 2008. p. 4.
24. Nishizaki N, Hirano D, Oishi K, Shimizu T. YouTube videos in Japanese as a source of information on nocturnal enuresis: a content-quality and reliability analysis. *Pediatrics international*. 2021;64(1):e15049-e.
25. Pratsinis M, Abt D, Müllhaupt G, Langenauer J, Knoll T, Schmid H-P, et al. Systematic assessment of information about surgical urinary stone treatment on YouTube. *World journal of urology*. 2021;39(3):935-42.
26. Pratsinis M, Babst C, Langenauer J, Schmid H-P, Piller A, Neuenschwander A, et al. Qualitative Assessment of Medical Information on YouTube: A Multilingual Comparison of Common Urological Conditions. *Urologia internationalis*. 2021;105(9-10):757-63.
27. Vu E, Pratsinis M, Plasswilm L, Schmid H-P, Panje C, Betschart P. Radiotherapy or surgery? Comparative, qualitative assessment of online patient education materials on prostate cancer. *Current oncology (Toronto)*. 2021;28(5):3420-9.
28. Shrank WH, Choudhry NK, Swanton K, Jain S, Greene JA, Harlam B, et al. Variations in Structure and Content of Online Social Networks for Patients With Diabetes. *Archives of internal medicine (1960)*. 2011;171(17):1589-91.
29. Kaestner V, Brown A, Tao D, Prasad V. Conflicts of interest in Twitter. *The Lancet Haematology*. 2017;4(9):e408-e9.
30. Chretien KC, Greysen SR, Chretien J-P, Kind T. Online Posting of Unprofessional Content by Medical Students. *JAMA : the journal of the American Medical Association*. 2009;302(12):1309-15.
31. Hessari NM, van Schalkwyk MCI, Thomas S, Petticrew M. Alcohol industry CSR organisations: What can their twitter activity tell us about their independence and their priorities? a comparative analysis. *International journal of environmental research and public health*. 2019;16(5):892.
32. Niles MT, Emery BF, Reagan AJ, Dodds PS, Danforth CM. Social media usage patterns during natural hazards. *PloS one*. 2019;14(2):e0210484-e.
33. Gottlieb M, Dyer S, Courtney DM. Information and Disinformation: Social Media in the COVID-19 Crisis. *Academic emergency medicine*. 2020;27(7):640-1.
34. González-Padilla DA, Tortolero-Blanco L. Social media influence in the COVID-19 Pandemic. *International Brazilian journal of urology*. 2020;46(suppl 1):120-4.
35. Hakoum MB, Jouni N, Abou-Jaoude EA, Hasbani DJ, Abou-Jaoude EA, Lopes LC, et al. Characteristics of funding of clinical trials: cross-sectional survey and proposed guidance. *BMJ Open*. 2017;7(10):e015997-e.
36. Deruelle F. The pharmaceutical industry is dangerous to health. Further proof with COVID-19. *Surgical neurology international*. 2022;13:475.

- 1  
2  
3 37. Roussel Y, Raoult D. Influence of conflicts of interest on public positions in the COVID-19 era, the  
4 case of Gilead Sciences. *New microbes and new infections*. 2020;38:100710-  
5  
6 38. Wong VSS, Avalos LN, Callaham ML. Industry payments to physician journal editors. *PloS one*.  
7 2019;14(2):e0211495-e.  
8 39. Makarem A, Mroué R, Makarem H, Diab L, Hassan B, Khabsa J, et al. Conflict of interest in the peer  
9 review process: A survey of peer review reports. *PloS one*. 2023;18(6):e0286908-e.  
10  
11  
12  
13  
14  
15  
16  
17  
18  
19  
20  
21  
22  
23  
24  
25  
26  
27  
28  
29  
30  
31  
32  
33  
34  
35  
36  
37  
38  
39  
40  
41  
42  
43  
44  
45  
46  
47  
48  
49  
50  
51  
52  
53  
54  
55  
56  
57  
58  
59  
60

1  
2  
3 **Supplementary file 1: Systematic review protocol**  
4  
5

6 **Title: Conflict of interest and funding in health communication on social**  
7 **media: a systematic review**  
8

9  
10 Vanessa Helou<sup>1</sup>, Fatima Mouzahem<sup>2</sup>, Adham Makarem<sup>1</sup>, Hussein A. Noureldine<sup>3</sup>, Rayane Al  
11 Khoury<sup>4</sup>, Dana Al Oweini<sup>2</sup>, Razan Halak<sup>1</sup>, Layal Hneiny<sup>5</sup>, Joanne Khabisa<sup>4</sup>, Elie A. Akl<sup>6,7</sup>  
12

13 <sup>1</sup>Faculty of Medicine, American University of Beirut, Beirut, Lebanon

14 <sup>2</sup>Faculty of Health Sciences, American University of Beirut, Beirut, Lebanon

15 <sup>3</sup>LAU Gilbert and Rose-Marie Chaghoury School of Medicine, Lebanese American  
16 University, Byblos, Lebanon

17 <sup>4</sup>Clinical Research Institute, American University of Beirut Medical Center, Beirut, Lebanon

18 <sup>5</sup>Saab Medical Library, University Libraries, American University of Beirut, Beirut, Lebanon

19 <sup>6</sup>Department of Health Research Methods, Evidence, and Impact (HEI), McMaster  
20 University, Canada

21 <sup>7</sup>Department of Internal Medicine, American University of Beirut Medical Center, Beirut,  
22 Lebanon  
23  
24

25  
26 **Corresponding author:**

27 Elie A. Akl, MD, MPH, PhD

28 Department of Internal Medicine

29 American University of Beirut Medical Center

30 P.O. Box: 11-0236

31 Riad-El-Solh Beirut 1107 2020

32 Beirut – Lebanon

33 Phone: 00961 1 374374

34 [ea32@aub.edu.lb](mailto:ea32@aub.edu.lb)  
35  
36  
37

38 **Keywords:** conflict of interest, funding, social media, health, systematic review  
39

40 **Ethical approval:** The study involves no human subjects and requires no ethical approval.  
41  
42  
43  
44  
45  
46  
47  
48  
49  
50  
51  
52  
53  
54  
55  
56  
57  
58  
59  
60

## BACKGROUND

Social media has reshaped the dissemination of information and medical education. The patient-physician relationship has been transformed with the introduction of social media especially during the COVID-19 pandemic when quarantine and restrictions were applied. Many users rely on the internet to find answers to their medical questions. Health professionals can communicate and share their health-related opinions using posts, videos, or blogs.

Within recent years, the use of social media by physicians and health care professionals has increased significantly with some estimates reporting increases from 42% in 2010 to as high as 90% in 2011 [1]. While 90% of health care professionals use social media platforms for personal purposes, 65% use them for professional reasons such as promotion of health behaviors, discussions of health care policy, communicating with colleagues, and education of patients, peers, and students [2]. However, professionals may have conflicts of interest (COI) that may bias their shared health-related recommendations on their platforms [1].

## STUDY OBJECTIVES

The objective of this study was to synthesize the available evidence on the disclosure of conflicts of interests by individuals posting health messages on social media, and on the reporting of funding sources of studies cited in health messages on social media,

## METHODS

### Design overview and definitions

We will conduct a systematic review to identify studies that addressed reporting of conflict of interest and funding in social media health communications. We will use the following definitions:

- Conflict of interests: “a COI exists when a past, current, or expected interest creates a significant risk of inappropriately influencing an individual’s judgment, decision, or action when carrying out a specific duty” [3].
- Declaration statement: any statement reporting a COI of a named individual, whether indicating the absence of COI or presence of a specific COI and describing it.

## Eligibility criteria

We will include articles that meet the following eligibility criteria:

- Topic: conflict of interest on social media or funding;
- Type of social media: we will include all social media platforms that fit the Web 2.0 definition. This includes blogs, and social media applications such as Facebook, Instagram, Twitter, LinkedIn, and YouTube. We will exclude studies that involved traditional media channels (Web 1.0) such as newspapers, radio, TV, emails, and websites;
- Field: health field, including clinical, health systems and policy, public health and biomedical sciences;
- Study design: any primary study including surveys, research letters, and qualitative studies. We will exclude editorials, abstracts, letters to the editor, reviews and opinion pieces;
- Date of publication: 2005 to current, with 2005 being the year of the rise of Web 2.0;
- Language: any language.

## Search strategy

We developed a search strategy, using the help of a librarian, for MEDLINE, EMBASE and Google Scholar electronic databases from 2005 to present. The search combined various keywords and medical subject headings (MeSH) terms relevant to concepts of conflict of interest, funding, and social media. We did not restrict the search to specific languages. We will also screen the reference lists of included studies as well as other relevant papers.

## Article selection

Teams of two reviewers will assess in duplicate and independently the titles and abstracts of citations identified by the search for potential eligibility using Rayyan screening tool. We will retrieve the full texts of citations judged as potentially eligible by at least one reviewer. Reviewers subsequently will screen in duplicate and independently the full texts using Rayyan screening tool. They will resolve any disagreements by discussion or with the help of a third reviewer when consensus cannot be reached. We will use standardized and pilot-tested screening tools. We will record the reasons for exclusion and summarize the results of the

1  
2  
3 selection process using the 2020 PRISMA flow diagram. The reviewers will conduct  
4 calibration exercises before the screening process.  
5  
6

### 7 **Data abstraction**

8  
9  
10 The reviewers will abstract data from eligible studies in duplicate and independently. We will  
11 use a standardized and pilot-tested data abstraction form. Disagreements will be resolved  
12 through discussion or with the help of a third reviewer (EAA). We will conduct a calibration  
13 exercise to enhance the validity of the process. Study authors will be contacted for any  
14 clarification.  
15  
16

17  
18 We will abstract the following variables from each included study:  
19

20 1. General characteristics of the study:

- 21 • Population (e.g., type of healthcare professionals: physicians, nurses, or other);
- 22 • Year of conduct;
- 23 • Study design;
- 24 • Funding of the study;
- 25 • COI of study authors
- 26 • Country of study authors

27  
28  
29  
30  
31  
32  
33 2. Social media:

- 34 • Type of social media (e.g., Facebook, twitter, Instagram, YouTube, LinkedIn ...);
- 35 • Number of posts, videos or blogs assessed;
- 36 • Language of posts, videos or blogs
- 37 • Country of the subjects of study
- 38 • Topic focus of the study, if any.

39  
40  
41  
42  
43  
44 3. Conflict of interest:

- 45 • Type of conflict of interest
- 46 • Subject of conflict of interest
- 47 • Source of conflict of interest
- 48 • Tools used to assess the presence of financial relationships
- 49 • Prevalence of conflict of interest
- 50 • Frequency of reporting of conflict of interest

- Proportion of undisclosed conflict of interest
- Unprofessional incidents involving conflict of interest

#### 4. Funding:

- Type of funding
- Source of funding
- Frequency of reporting of funding

### **Quality assessment**

A team of two reviewers will assess independently the risk of bias of included studies using Mixed Methods Appraisal Tool (MMAT). This tool is designed for the appraisal stage of systematic reviews that include qualitative, quantitative or mixed methods studies [4]. We expect most of the studies to be cross-sectional and these will be assessed using the relevant part of the tool.

### **Data synthesis**

Due to the nature of the data, we will report the results in narrative and tabular formats.



**REFERENCES**

1. McCarthy CP, DeCamp M, McEvoy JW. Social Media and Physician Conflict of Interest. *American Journal of Medicine*. 2018;131(8):859-60.
2. TenBarge AM, Riggins JL. Responding to Unsolicited Medical Requests from Health Care Professionals on Pharmaceutical Industry-Owned Social Media Sites: Three Pilot Studies. *Journal of medical Internet research*. 2018;20(10):e285-e.
3. Akl EA, Hakoum M, Khamis A, Khabsa J, Vassar M, Guyatt G. A framework is proposed for defining, categorizing, and assessing conflicts of interest in health research. *Journal of clinical epidemiology*. 2022.
4. Hong QN, Fàbregues S, Bartlett G, Boardman F, Cargo M, Dagenais P, et al. The Mixed Methods Appraisal Tool (MMAT) Version 2018 for Information Professionals and Researchers. *Education for information*. 2018;34(4):285-91.

**Supplementary file 2: Search strategies used in Medline(OVID), Embase and Google Scholar**

**Medline Search Strategy**

Database: Ovid MEDLINE(R) and Epub Ahead of Print, In-Process & Other Non-Indexed Citations and Daily <1946 to February 15, 2019>

Search Strategy:

-----

1 "Conflict of Interest"/ (9255)  
 2 ((competing or conflict\*) adj3 (interest? or influence? or relationship?)).mp. (18489)  
 3 financial support/ or research support as topic/ (25591)  
 4 (((financ\* or monetary or industr\* or pharmaceutical\*) adj3 (fund\* or pay\* or paid or  
 5 support or contributi\* or compensat\* or sponsor\* or backing or (kick adj back\*) or incentive?  
 6 or re?imburse\* or subsidi\* or award\* or endow\* or tie? or link\* or associat\* or affiliation? or  
 7 relation\* or grant\*)) or disclos\*).mp. (120953)  
 8 Disclosure/ (12719)  
 9 Gift Giving/ (1521)  
 10 ((financ\* or gift? or gift-giving) adj3 (disclos\* or report\* or declar\* or reveal\* or receiv\*  
 11 or giv\* or gave or accept\* or award\* or admit\*)).mp. [mp=title, abstract, original title, name  
 12 of substance word, subject heading word, floating sub-heading word, keyword heading word,  
 13 organism supplementary concept word, protocol supplementary concept word, rare disease  
 14 supplementary concept word, unique identifier, synonyms] (7487)  
 15 or/1-7 (158539)  
 16 exp Mass Media/ (44039)  
 17 (mass adj2 (media? or medium or communication?)).mp. (16758)  
 18 (columnist? or reporter? or correspondent? or commentator? or reviewer?).mp.  
 19 (145928)  
 20 Social Media/ (5474)  
 21 (((social or digital) adj2 (medium or media\* or network\* or net-work\* or bookmark\* or  
 22 book-mark\* or application? or debate\* or channel\* or communication? or collaborat\*)) or  
 23 (institution\* adj reposit\*)).mp. (35361)  
 24 Blogging/ (903)  
 25 (blog\* or microblog\* or micro-blog\* or weblog\*).mp. (2308)  
 26 (tout or wordpress or yammer or citeulike or zotero or evernote or delicious or Digg or  
 27 picasa or youtube or Vimeo or reddit or snapchat or mendeley).mp. (3525)  
 28 exp Social Networking/ (2487)  
 29 (facebook or twitter or tweet\* or LinkedIn or pinterest).mp. (5334)  
 30 ((Google adj plus) or google?+).mp. (15664)  
 31 (Tumblr or Instagram or mspace or researchgate or academia or figshare or  
 32 mendeley).mp. (7153)  
 33 Webcasts as Topic/ (301)  
 34 (podcast\* or pod-cast\* or webcast\* or web-cast\*).mp. (1687)  
 35 (rss adj2 feed\*).mp. (49)  
 36 (weibo or flickr).mp. (171)  
 37 ((virtual or video\* or content? or project? or audio or digital or online or forum? or  
 38 web) adj2 (world? or reality or place? or communit\* or communicat\* or collaborat\* or  
 39 shar\*)).mp. (23762)  
 40 (web adj2 application\*).mp. (2856)  
 41 ((user adj generated) or usergenerated).mp. (359)

1  
2  
3  
4  
5  
6  
7  
8  
9  
10  
11  
12  
13  
14  
15  
16  
17  
18  
19  
20  
21  
22  
23  
24  
25  
26  
27  
28  
29  
30  
31  
32  
33  
34  
35  
36  
37  
38  
39  
40  
41  
42  
43  
44  
45  
46  
47  
48  
49  
50  
51  
52  
53  
54  
55  
56  
57  
58  
59  
60

28 (wikipedia or wiki\* or "web 2.0").mp. (1786)  
29 ((knowledge or internet or (electronic adj mail) or email or e-mail or health or listserv\*)  
adj2 (share\* or communicat\* or sharing? or collaborat\*).mp. (15600)  
30 or/9-29 (296669)  
31 8 and 30 (4486)  
32 limit 31 to yr="2005 -Current" (3436)

\*\*\*\*\*

For peer review only

## EMBASE Search Strategy

#33 #32 AND (2005:py OR 2006:py OR 2007:py OR 2008:py OR 2010:py OR 2011:py OR 2012:py OR 2013:py OR 2014:py OR 2015:py OR 2016:py OR 2017:py OR 2018:py OR 2019:py OR 2020:py OR 2021:py OR 2022:py) **5551**

#32 #31

#31 #9 AND #30 **6193**

#30 #10 OR #11 OR #12 OR #13 OR #14 OR #15 OR #16 OR #17 OR #18 OR #19 OR #20 OR #21 OR #22 OR #23 OR #24 OR #25 OR #26 OR #27 OR #28 OR #29 **334472**

#29 (knowledge OR internet OR electronic) NEAR/2 (mail OR email OR 'e mail' OR health OR listserv\*) NEAR/2 (share\* OR communicat\* OR sharing\* OR collaborat\*) **2485**

#28 wikipedia OR wiki\* OR 'web 2.0' **2900**

#27 (user NEXT/1 generated) OR usergenerated **407**

#26 web NEAR/2 application\* **3670**

#25 (virtual OR video\* OR content\* OR project\* OR audio OR digital OR online OR forum\* OR web) NEAR/2 (world\* OR reality OR place\* OR communit\* OR communicat\* OR collaborat\* OR shar\*) **44943**

#24 weibo OR flickr **1657**

#23 rss NEAR/2 feed\* **72**

#22 podcast\* OR 'pod cast\*' OR webcast\* OR 'web cast\*' **1687**

#21 'webcast'/de **310**

#20 tumblr OR instagram OR myspace OR researchgate OR academia OR figshare OR Mendeley **41870**

#19 (google NEXT/1 plus) OR google?+ **63**

#18 facebook OR twitter OR tweet\* OR linkedin OR pinterest **7561**

#17 'social network'/exp **13447**

#16 tout OR wordpress OR yammer OR citeulike OR zotero OR evernote OR delicious OR digg OR picasa OR youtube OR vimeo OR reddit OR snapchat **4608**

#15 blog\* OR microblog\* OR 'micro blog\*' OR weblog\* **3710**

#14 'blogging'/de **260**

#13 ((social OR digital) NEAR/2 (medium OR media\* OR network\* OR 'net work\*' OR bookmark\* OR 'book mark\*' OR application? OR debate\* OR channel\* OR communication? OR collaborat\*)) OR (institution\* NEAR/2 repositor\*) **44828**

#12 'social media'/de **13939**

1  
2  
3 #11 columnist\* OR reporter\* OR correspondent\* OR commentator\* OR reviewer\* **172962**

4 #10 'mass medium'/exp **17396**

5  
6 #9 #1 OR #2 OR #3 OR #4 OR #5 OR #6 OR #7 OR #8 **224956**

7  
8 #8 (financ\* OR gift\* OR 'gift giving') NEAR/3 (disclos\* OR report\* OR declar\* OR  
9 reveal\* OR receiv\* OR giv\* OR gave OR accept\* OR award\* OR admit\*) **10745**

10  
11 #7 'gift giving'/de **1086**

12  
13 #6 disclos\* **89957**

14  
15 #5 (financ\* OR monetary OR industr\* OR pharmaceutical\*) NEAR/3 (fund\* OR pay\* OR  
16 paid OR support OR contributi\* OR compensat\* OR sponsor\* OR backing OR 'kick back'  
17 OR incentive\* OR re\*imburse\* OR subsidi\* OR award\* OR endow\* OR disclos\* OR tie  
18 OR ties OR link\* OR associat\* OR affiliat\* OR relation\* OR grant\*) **80180**

19  
20 #4 research NEAR/1 support **6650**

21  
22 #3 'funding'/de **37321**

23  
24 #2 (competing OR conlict\*) NEAR/3 (interest\* OR influence\* OR relationship\*) **22710**

25  
26 #1 'conflict of interest'/exp **11111**

27  
28 .....

**Google Scholar**

("Conflict of Interest" OR "Conflict of Interests" OR "Competing Interest" OR "Competing Interests" OR "financial support" OR "financial declaration") AND (Facebook OR Instagram OR twitter OR tweet OR Pinterest OR LinkedIn OR fig share OR Mendeley OR Snapchat OR "social media")

Picked: 200 articles

For peer review only

Supplementary file 3: PRISMA 2020 flow diagram for systematic reviews

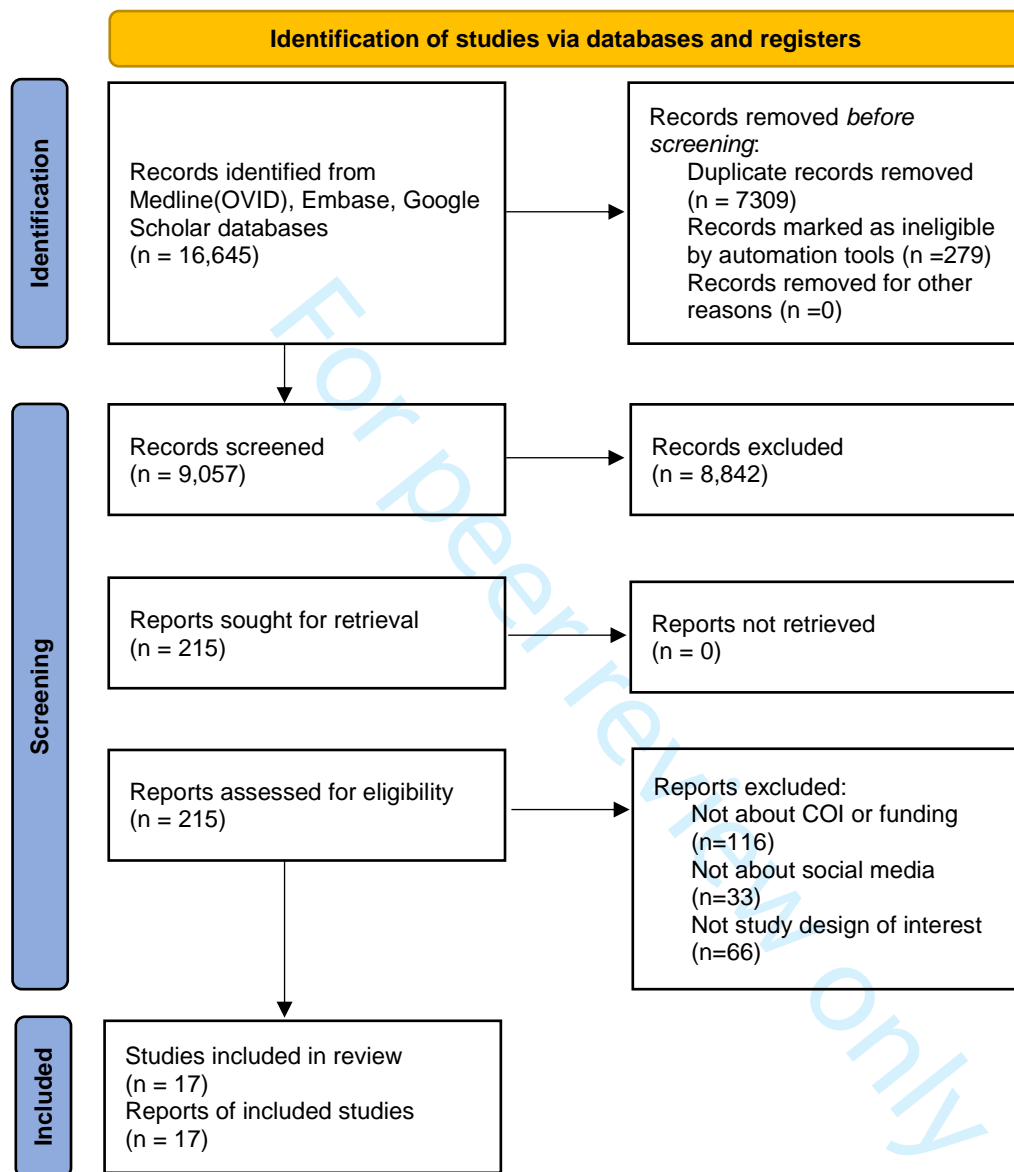

From: Page MJ, McKenzie JE, Bossuyt PM, Boutron I, Hoffmann TC, Mulrow CD, et al. The PRISMA 2020 statement: an updated guideline for reporting systematic reviews. *BMJ* 2021;372:n71. doi: 10.1136/bmj.n71

**Supplementary File 4:** Excluded studies in full-text screening with their corresponding reason of exclusion.

| <b>Author/Journal, year</b> | <b>Reason of exclusion</b>   |
|-----------------------------|------------------------------|
| Aase 2010 [1]               | Not study design of interest |
| Abdel-Wahab 2019 [2]        | Not about COI                |
| Aboujaoude 2019 [3]         | Not about COI                |
| Addiction 2011 [4]          | Not about social media       |
| Ahc 2019 [5]                | Not about social media       |
| AIDS alert 2011 [6]         | Not about social media       |
| Aiken 2012 [7]              | Not about COI                |
| Al-Balushi 2020 [8]         | Not study design of interest |
| Alshaikh 2019 [9]           | Not about social media       |
| Anderson 2010 [10]          | Not about COI                |
| Anderson 2010 [10]          | Not study design of interest |
| Anderson 2013 [11]          | Not about COI                |
| Apperson 2019 [12]          | Not about COI                |
| Au 2021 [13]                | Not study design of interest |
| Azizi 2013 [14]             | Not about COI                |
| Back letter 2008 [15]       | Not about social media       |
| Back letter 2008 [16]       | Not about social media       |
| Baier 2019 [17]             | Not about COI                |
| Bamat 2018 [18]             | Not study design of interest |
| Barber 2020 [19]            | Not about social media       |
| Barreda 2015 [20]           | Not about COI                |
| Baxter 2009 [21]            | Not study design of interest |
| Bayne 2017 [22]             | Not about COI                |
| Bechini 2021 [23]           | Not about social media       |
| Becker 2015 [24]            | Not about social media       |
| Bertholf 2021 [25]          | Not study design of interest |
| Bhat 2019 [26]              | Not study design of interest |
| Bibault 2017 [27]           | Not study design of interest |
| Blastl 2020 [28]            | Not study design of interest |
| Bosslet 2011 [29]           | Not about COI                |
| Braccia 2009 [30]           | Not about COI                |
| Braillon 2018 [31]          | Not study design of interest |
| Braunstein 2012 [32]        | Not about COI                |
| Bredenoord 2017 [33]        | Not about COI                |
| Bukhari 2021 [34]           | Not about social media       |
| Bullock 2014 [35]           | Not about COI                |
| Cain 2010 [36]              | Not about COI                |
| Capel 2019 [37]             | Not about COI                |
| Carson 2018 [38]            | Not about COI                |
| Casigliani 2020 [39]        | Not study design of interest |
| Casswell 2018 [40]          | Not about social media       |



|    |                            |                              |
|----|----------------------------|------------------------------|
| 1  |                            |                              |
| 2  |                            |                              |
| 3  |                            |                              |
| 4  | Chan 2012 [41]             | Not study design of interest |
| 5  | Chretien 2013 [42]         | Not study design of interest |
| 6  | Coutts 2018 [43]           | Not about social media       |
| 7  | Cunningham 2014 [44]       | Not about COI                |
| 8  | Dainton 2009 [45]          | Not about COI                |
| 9  | De Ambrogi 2019 [46]       | Not study design of interest |
| 10 | DeCamp 2012 [47]           | Not study design of interest |
| 11 | DeCamp 2013 [48]           | Not study design of interest |
| 12 | DeCamp 2013 [49]           | Not study design of interest |
| 13 | DeChello 2012 [50]         | Not study design of interest |
| 14 | Denecke 2014 [51]          | Not study design of interest |
| 15 |                            |                              |
| 16 | Dolgin 2019 [52]           | Not about social media       |
| 17 | Douglas 2020 [53]          | Not study design of interest |
| 18 | Drone 2015 [54]            | Not about COI                |
| 19 | Dugdale 2021 [55]          | Not study design of interest |
| 20 |                            |                              |
| 21 | ED management 2005 [56]    | Not about COI                |
| 22 | Englund 2012 [57]          | Not about COI                |
| 23 | Essary 2011 [58]           | Not about COI                |
| 24 |                            |                              |
| 25 | Failli 2021 [59]           | Not about social media       |
| 26 | Faloon 2006 [60]           | Not about COI                |
| 27 |                            |                              |
| 28 | Farrelly 2014 [61]         | Not about COI                |
| 29 | Fattore 2019 [62]          | Not about COI                |
| 30 | Fontanarosa 2019 [63]      | Not about social media       |
| 31 | For the Record 2011 [64]   | Not study design of interest |
| 32 | For the record 2013 [65]   | Not study design of interest |
| 33 |                            |                              |
| 34 | Frankish 2012 [66]         | Not about COI                |
| 35 | Galbraith 2014 [67]        | Not about COI                |
| 36 | Gifford 2021 [68]          | Not study design of interest |
| 37 | Gilligan 2019 [69]         | Not study design of interest |
| 38 | Gordon 2010 [70]           | Not about COI                |
| 39 | Gottlieb 2020 [71]         | Not study design of interest |
| 40 |                            |                              |
| 41 | Grace 2021 [72]            | Not about COI                |
| 42 | Grummer-Strawn 2019 [73]   | Not about social media       |
| 43 | Guo 2020 [74]              | Not study design of interest |
| 44 | Gupta 2020 [75]            | Not study design of interest |
| 45 | Haddas 2021 [76]           | Not study design of interest |
| 46 |                            |                              |
| 47 | Halдар 2010 [77]           | Not about COI                |
| 48 | Hampton 2005 [78]          | Not about social media       |
| 49 | Hanley 2012 [79]           | Not about COI                |
| 50 | Harris 2012 [80]           | Not about COI                |
| 51 |                            |                              |
| 52 | Henderson 2014 [81]        | Not about COI                |
| 53 | Henderson 2020 [82]        | Not about COI                |
| 54 | Henry 2014 [83]            | Not about COI                |
| 55 | Hernandez-Aguado 2020 [84] | Not about COI                |
| 56 |                            |                              |
| 57 |                            |                              |
| 58 |                            |                              |
| 59 |                            |                              |
| 60 |                            |                              |

|                                               |                              |
|-----------------------------------------------|------------------------------|
| Hessari 2019 [85]                             | Not study design of interest |
| Hetzler 2020 [86]                             | Not about COI                |
| Holden 2017 [87]                              | Not about COI                |
| Huby 2016 [88]                                | Not about COI                |
| Hwang 2016 [89]                               | Not health field             |
| Hwong 2014 [90]                               | Not study design of interest |
| Islam 2019 [91]                               | Not study design of interest |
| Jiang 2017 [92]                               | Not about COI                |
| Jones 2021 [93]                               | Not about COI                |
| Joshi 2020 [94]                               | Not study design of interest |
| Journal of Instructional Psychology 2012 [95] | Not about COI                |
| Journal of Korean medical science 2015 [96]   | Not about COI                |
| Katz 2014 [97]                                | Not about COI                |
| Kh 2009 [98]                                  | Not about social media       |
| Kirschner 2013 [99]                           | Not study design of interest |
| Kleebauer 2014 [100]                          | Not about COI                |
| Knoepfler 2016 [101]                          | Not about COI                |
| Knopf 2018 [102]                              | Not about COI                |
| Korman 2021 [103]                             | Not about social media       |
| Kullgren 2014 [104]                           | Not about COI                |
| Kunze 2020 [105]                              | Not about COI                |
| Lachman 2013 [106]                            | Not about COI                |
| Lackner 2012 [107]                            | Not about social media       |
| Lagu 2011 [108]                               | Not about COI                |
| Layng 2012 [109]                              | Not about COI                |
| Lazard 2020 [110]                             | Not about COI                |
| Lee 2016 [111]                                | Not health field             |
| Lee 2020 [112]                                | Not about COI                |
| Lerner 2013 [113]                             | Not about COI                |
| Lin 2016 [114]                                | Not about COI                |
| Lusis 2009 [115]                              | Not about COI                |
| Macauley 2021 [116]                           | Not study design of interest |
| MacWilliam 2006 [117]                         | Not study design of interest |
| Mansfield 2011 [118]                          | Not about COI                |
| Margaret 2019 [119]                           | Not about COI                |
| Mayes 2018 [120]                              | Not about social media       |
| McCarthy 2018 [121]                           | Not study design of interest |
| McComas 2008 [122]                            | Not about COI                |
| McCullough 2010 [123]                         | Not about COI                |
| Medical marketing 2016 [124]                  | Not study design of interest |
| Militello 2021 [125]                          | Not study design of interest |
| Milton 2014 [126]                             | Not about COI                |
| Milton 2016 [127]                             | Not about COI                |
| Milton 2018 [128]                             | Not about COI                |
| Minhas 2006 [129]                             | Not study design of interest |

|    |                                  |                              |
|----|----------------------------------|------------------------------|
| 1  |                                  |                              |
| 2  |                                  |                              |
| 3  |                                  |                              |
| 4  | Modern Healthcare 2017 [130]     | Not about COI                |
| 5  | Moodley 2013 [131]               | Not about COI                |
| 6  | Moses 2014 [132]                 | Not about COI                |
| 7  | Moukarzel 2021 [133]             | Not study design of interest |
| 8  | Murakami 2019 [134]              | Not about COI                |
| 9  | Muzumdar 2021 [135]              | Not study design of interest |
| 10 | Naeem 2021 [136]                 | Not about COI                |
| 11 | Nau 2017 [137]                   | Not about COI                |
| 12 | Neuer 2019 [138]                 | Not about social media       |
| 13 | Neville 2015 [139]               | Not about COI                |
| 14 | Neville 2016 [140]               | Not about COI                |
| 15 | Nursing ethics 2015 [141]        | Not study design of interest |
| 16 | Nursing standard 2016 [142]      | Not study design of interest |
| 17 | Nursing times 2011 [143]         | Not study design of interest |
| 18 | O'Glasser 2020 [144]             | Not study design of interest |
| 19 | O'Hanlon 2011 [145]              | Not about COI                |
| 20 | O'Keeffe 2019 [146]              | Not study design of interest |
| 21 | O'Rourke 2015 [147]              | Not about COI                |
| 22 | Oncology 2012 [148]              | Not about COI                |
| 23 | Ong 2021 [149]                   | Not study design of interest |
| 24 | OR Manager 2009 [150]            | Not about COI                |
| 25 | Oransky 2006 [151]               | Not study design of interest |
| 26 | Ornstein 2011 [152]              | Not about social media       |
| 27 | Padeiro 2021 [153]               | Not about COI                |
| 28 | Pagoto 2019 [154]                | Not about COI                |
| 29 | Parasidis 2019 [155]             | Not about COI                |
| 30 | Paterson 2019 [156]              | Not study design of interest |
| 31 | Peltier 2012 [157]               | Not about social media       |
| 32 | Pelton 2012 [158]                | Not about COI                |
| 33 | Pierce 2019 [159]                | Not about COI                |
| 34 | Prasad 2018 [160]                | Not study design of interest |
| 35 | Prateek 2018 [161]               | Not about COI                |
| 36 | Ragan 2012 [162]                 | Not about COI                |
| 37 | Ranpariya 2020 [163]             | Not study design of interest |
| 38 | Ravn 2020 [164]                  | Not about COI                |
| 39 | Rechenberg 2013 [165]            | Not about social media       |
| 40 | Redick 2022 [166]                | Not about social media       |
| 41 | Research Practitioner 2011 [167] | Not about social media       |
| 42 | Roucka 2014 [168]                | Not about COI                |
| 43 | Roupret 2014 [169]               | Not about COI                |
| 44 | Samsa 2019 [170]                 | Not about social media       |
| 45 | Santillan-Doherty 2020 [171]     | Not about COI                |
| 46 | Santoro 2015 [172]               | Not about COI                |
| 47 | Santoro 2022 [173]               | Not study design of interest |
| 48 | Sartor 2019 [174]                | Not about social media       |
| 49 |                                  |                              |
| 50 |                                  |                              |
| 51 |                                  |                              |
| 52 |                                  |                              |
| 53 |                                  |                              |
| 54 |                                  |                              |
| 55 |                                  |                              |
| 56 |                                  |                              |
| 57 |                                  |                              |
| 58 |                                  |                              |
| 59 |                                  |                              |
| 60 |                                  |                              |

|    |                               |                              |
|----|-------------------------------|------------------------------|
| 1  |                               |                              |
| 2  |                               |                              |
| 3  | Scruth 2015 [175]             | Not about COI                |
| 4  | Seppey 2017 [176]             | Not about social media       |
| 5  | Sh 2019 [177]                 | Not about COI                |
| 6  | Sharma 2020 [178]             | Not about COI                |
| 7  | Shore 2011 [179]              | Not about COI                |
| 8  | Silva 2018 [180]              | Not about COI                |
| 9  | Sissung 2021 [181]            | Not study design of interest |
| 10 | Slagle 2011 [182]             | Not about social media       |
| 11 | Smyth 2005 [183]              | Not study design of interest |
| 12 | Snyder 2011 [184]             | Not about COI                |
| 13 | Studenic 2019 [185]           | Not about COI                |
| 14 | Swartz 2016 [186]             | Not about COI                |
| 15 | Tanchuco 2020 [187]           | Not about COI                |
| 16 | Technology 2021 [188]         | Not about COI                |
| 17 | Terrasse 2019 [189]           | Not study design of interest |
| 18 | The American nurse 2015 [190] | Not study design of interest |
| 19 | Tulloch 2011 [191]            | Not about COI                |
| 20 | Van Cauwenberghe 2012 [192]   | Not about COI                |
| 21 | Van Eperen 2010 [193]         | Not about COI                |
| 22 | Varghese 2019 [194]           | Not study design of interest |
| 23 | Varghese 2019 [195]           | Not study design of interest |
| 24 | Vogel 2020 [196]              | Not about COI                |
| 25 | Wagner 2012 [197]             | Not study design of interest |
| 26 | Wallen 2013 [198]             | Not about COI                |
| 27 | Wang 2019 [199]               | Not about COI                |
| 28 | Wayant 2018 [200]             | Not about social media       |
| 29 | Weijs 2017 [201]              | Not about COI                |
| 30 | Weijs 2019 [202]              | Not about COI                |
| 31 | Weinstein 2011 [203]          | Not about COI                |
| 32 | Wheelock 2021 [204]           | Not study design of interest |
| 33 | White 2007 [205]              | Not about COI                |
| 34 | Wilkinson 2018 [206]          | Not about COI                |
| 35 | Williams 2011 [207]           | Not about COI                |
| 36 | Wisniewski 2017 [208]         | Not about COI                |
| 37 | Yan 2020 [209]                | Not study design of interest |
| 38 | Yeh 2018 [210]                | Not about COI                |
| 39 | Yeo 2020 [211]                | Not about COI                |
| 40 | Zember 2015 [212]             | Not about COI                |
| 41 | Zenone 2021 [213]             | Not study design of interest |
| 42 | Zhitomirsky 2016 [214]        | Not study design of interest |
| 43 | Zhou 2018 [215]               | Not study design of interest |
| 44 |                               |                              |
| 45 |                               |                              |
| 46 |                               |                              |
| 47 |                               |                              |
| 48 |                               |                              |
| 49 |                               |                              |
| 50 |                               |                              |
| 51 |                               |                              |
| 52 |                               |                              |
| 53 |                               |                              |
| 54 |                               |                              |
| 55 |                               |                              |
| 56 |                               |                              |
| 57 |                               |                              |
| 58 |                               |                              |
| 59 |                               |                              |
| 60 |                               |                              |

## REFERENCES

1. Aase S. Business of dietetics. Toward e-professionalism: thinking through the implications of navigating the digital world. *Journal of the American Dietetic Association*. 2010;110(10):1442-7.
2. Abdel-Wahab N, Rai D, Siddhanamatha H, Dodeja A, Suarez-Almazor ME, Lopez-Olivo MA. A comprehensive scoping review to identify standards for the development of health information resources on the internet. *PLoS ONE*. 2019;14(6).
3. Aboujaoude E. Problematic Internet use two decades later: Apps to wean us off apps. *CNS Spectrums*. 2019;24(4):371-3.
4. News and Notes. *Addiction*. 2011;106(6):1200-3.
5. AHC M. Updated Ethics Manual Addresses Many New Realities in Clinical Practice. *Medical Ethics Advisor*. 2019;35(3):36-.
6. New draft guidance on financial disclosure. *AIDS Alert*. 2011;26(7):81-2.
7. Aiken T. Dodging the landmines in social media. *Imprint*. 2012;59(2):34-5.
8. Al-Balushi AA. In the Era of Social Media: Is it time to establish a code of online ethical conduct for healthcare professionals? *Sultan Qaboos University medical journal*. 2020;20(1):e25-e8.
9. Alshaikh EA, Almedimigh AF, Alruwaili AM, Almajnoni AH, Alhajiahmed A, Almalki TS, et al. Patient-Focused Online Resources for Melanoma: Highly Variable Content and Quality. *Journal of Cancer Education*. 2019;34(4):775-81.
10. Anderson EE. The role of community-based organizations in the recruitment of human subjects: ethical considerations. *American Journal of Bioethics*. 2010;10(3):20-1.
11. Anderson S, Guyton M. Ethics in an Age of Information Seekers: A Survey of Licensed Healthcare Providers about Online Social Networking. *Journal of Technology in Human Services*. 2013;31(2):112-28.
12. Apperson A, Stollefson M, Paige SR, Chaney BH, Don Chaney J, Wang MQ, et al. Facebook groups on chronic obstructive pulmonary disease: Social media content analysis. *International journal of environmental research and public health*. 2019;16(20):3789.
13. Au CH, Ho KKW, Chiu DKW. Stopping healthcare misinformation: The effect of financial incentives and legislation. *Health policy (Amsterdam)*. 2021;125(5):627-33.
14. Azizi T. The issues surrounding social network sites and healthcare professionals. *Journal of perioperative practice*. 2013;23(10):233-6.
15. The mass media and commercially sponsored research: a call for full disclosure. *Back Letter*. 2008;23(11):126-.
16. Websites on pain a minefield of misinformation. *Back Letter*. 2008;23(4):38-.
17. Baier AL. The Ethical Implications of Social Media: Issues and Recommendations For Clinical Practice. *Ethics & Behavior*. 2019;29(5):341-51.
18. Bamat NA, Manley BJ, Harer MW, Rol, D. Social media for pediatric research: what, who, why, and #? *Pediatric Research*. 2018;84(5):597-9.
19. Barber K. Conflict of Interest—Let the Readers Decide. *Journal of cutaneous medicine and surgery*. 2020;24(3):238-9.
20. Barreda AA, Bilgihan A, Nusair K, Okumus F. Generating brand awareness in Online Social Networks. *Computers in Human Behavior*. 2015;50:600-9.
21. Baxter JD. Are we providers or physicians?...*Arch Intern Med*. 2009 May 11;169(9):829-31. *Archives of Internal Medicine*. 2009;169(18):1725-.
22. Bayne CE, Davies BJ. Chipping away at the body politic one study at a time: the case for more 'unprofessional' online content. *BJU International*. 2017;120(5):609-10.
23. Bechini A, Zanella B, Bonito B, Paoli S, Di Pisa G, Moscadelli A, et al. Quality and safety of vaccines manufacturing: An online survey on attitudes and perceptions of Italian internet users. *Vaccines (Basel)*. 2021;9(9):1015.

- 1
  - 2
  - 3
  - 4
  - 5
  - 6
  - 7
  - 8
  - 9
  - 10
  - 11
  - 12
  - 13
  - 14
  - 15
  - 16
  - 17
  - 18
  - 19
  - 20
  - 21
  - 22
  - 23
  - 24
  - 25
  - 26
  - 27
  - 28
  - 29
  - 30
  - 31
  - 32
  - 33
  - 34
  - 35
  - 36
  - 37
  - 38
  - 39
  - 40
  - 41
  - 42
  - 43
  - 44
  - 45
  - 46
  - 47
  - 48
  - 49
  - 50
  - 51
  - 52
  - 53
  - 54
  - 55
  - 56
  - 57
  - 58
  - 59
  - 60
24. Becker BW. Research Faux Pas: The Stigma of Wikipedia. *Behavioral & Social Sciences Librarian*. 2015;34(3):165-9.
25. Bertholf RL. Scientific evidence, medical practice, and the insidious danger of anecdotal reports. *Lab Medicine*. 2021;51(6):555-6.
26. Bhat A, Subramanian K. Scientific and social media impact of pharma sponsored research preprints-boon or bane? *Current Medical Research and Opinion*. 2019;35:23.
27. Bibault JE, Katz MS, Motwani S. Social media for radiation oncologists: A practical primer. *Advances in Radiation Oncology*. 2017;2(3):277-80.
28. Blastland M, Freeman ALJ, van der Linden S, Marteau TM, Spiegelhalter D. Five rules for evidence communication. *Nature (London)*. 2020;587(7834):362-4.
29. Bosslet GT. Commentary: The good, the bad, and the ugly of social media. *Academic Emergency Medicine*. 2011;18(11):1221-2.
30. Braccia D. Web connect. Find online resources for conducting comparative effectiveness research. *ONS Connect*. 2009;24(5):16-.
31. Braillon A. The Sunshine Act Has Been for a World that Doesn't Exist Anymore. *The American journal of medicine*. 2018;131(11):e471-e.
32. Braunstein N. Ethical Issues for Students. *Journal of the Academy of Nutrition and Dietetics*. 2012;112(8):1253-4.
33. Bredenoord AL, Boeckhout M. Ancillary Care Obligations for Social Media Platforms. *The American journal of bioethics : AJOB*. 2017;17(3):29-31.
34. Bukhari A, Alshihri S, Abualenain M, Barton J, Kupsky G, Pines JM, et al. "Headache" Online Information: An Evaluation of Readability, Quality, Credibility, and Content. *Permanente journal*. 2021;25(2):1-.
35. Bullock A. Does technology help doctors to access, use and share knowledge? *Medical education*. 2014;48(1):28-33.
36. Cain J, Fink JL. Legal and ethical issues regarding social media and pharmacy education. *American journal of pharmaceutical education*. 2010;74(10):184.
37. Capel I, Wong A, Rowl, M, Olusanya O, Malbrain MLNG. Social media in critical care: Variation across professional groups. *Anaesthesiology Intensive Therapy*. 2019;51:57.
38. Carson NJ, Gansner M, Khang J. Assessment of Digital Media Use in the Adolescent Psychiatric Evaluation. *Child and Adolescent Psychiatric Clinics of North America*. 2018;27(2):133-43.
39. Casigliani V, De Nard F, De Vita E, Arzilli G, Grosso FM, Quattrone F, et al. Too much information, too little evidence: Is waste in research fuelling the covid-19 infodemic? *The BMJ*. 2020;370.
40. Casswell S. Conflict of interest and alcohol discourse-a new face but familiar messages. *New Zealand Medical Journal*. 2018;131(1483):59-62.
41. Chan SD. Being professional in the social media world. *The Journal of the American College of Dentists*. 2012;79(4):48-55.
42. Chretien KC, Kind T. Social media and clinical care: Ethical, professional, and social implications. *Circulation*. 2013;127(13):1413-21.
43. Coutts AJ. Dealing With Conflicts of Interest. *International Journal of Sports Physiology & Performance*. 2018;13(10):1257-8.
44. Cunningham A. *Social media and medical professionalism*. Cardiff UK Malden, Massachusetts: Wiley-Blackwell; 2014 2014. 110-2 p.
45. Dainton C. Physician-writers in the age of blogging. *CMAJ: Canadian Medical Association Journal*. 2009;181(5):348-.
46. De Ambrogi M. A doctor's choice. *The Lancet*. 2019;394(10202):908.
47. Decamp M. Social media guidance, conflicts of interest, and health inequalities...*Lancet*. 2012 Apr 28;379(9826):1562. *Lancet*. 2012;380(9840):472-3.



- 1
- 2
- 3
- 4 48. DeCamp M, Koenig TW, Chisolm MS. Social media and physicians' online identity crisis. *JAMA - Journal of the American Medical Association*. 2013;310(6):581-2.
- 5
- 6 49. DeCamp M. Doctors don't disclose conflicts of interest on social media. *Healthcare Risk Management*. 2013;35(1):9-10.
- 7
- 8 50. DeChello PL. Legal and ethical issues: what the clinician really needs to know. *PARADIGM (Targeted Publications Group, Inc)*. 2012;17(2):20-2.
- 9
- 10 51. Denecke K. Ethical Aspects of Using Medical Social Media in Healthcare Applications. *Studies in Health Technology & Informatics*. 2014;198:55-62.
- 11
- 12 52. Dolgin E. The hunt for the lesser-known funding source. *Nature*. 2019;570(7759):127-9.
- 13 53. Douglas A, Capdeville M. From Index Medicus to the Palm of Our Hands—What's “App-ening” in Graduate Medical Education. *Journal of Cardiothoracic and Vascular Anesthesia*. 2020;34(8):2133-5.
- 14
- 15 54. Drone J. It's on Facebook, So It Must Be True. *Journal (Indiana Dental Association)*. 2015;94(4):16-9.
- 16
- 17 55. Dugdale LS, Braswell H. Instacash: The Ethics of Leveraging Medical Student Status on Social Media. *Academic medicine : journal of the Association of American Medical Colleges*. 2021;96(4):507-11.
- 18
- 19 56. Physician-owned group or corporation: pros, cons. *ED Management*. 2005;17(4):39-40.
- 20
- 21 57. Englund H, Chappy S, Jambunathan J, Gohdes E. Ethical reasoning and online social media. *Nurse educator*. 2012;37(6):242-7.
- 22
- 23 58. Essary AC. The impact of social media and technology on professionalism in medical education. *Journal of Physician Assistant Education*. 2011;22(4):50-3.
- 24
- 25 59. Failli V, Kleitman N, Lammertse DP, Hsieh JTC, Steeves JD, Fawcett JW, et al. Experimental treatments for Spinal Cord Injury: What you should know. *Topics in Spinal Cord Injury Rehabilitation*. 2021;27(2):50-73.
- 26
- 27 60. Faloon W. As we see it. Dietary supplements attacked by the media. *Life Extension*. 2006;12(6):7-18.
- 28
- 29 61. Farrelly R. Nurses and social media. *British journal of nursing (Mark Allen Publishing)*. 2014;23(6):343.
- 30
- 31 62. Fattore D, Delfino M, Fabbrocini G. Legal, medical, and ethical implications of instant messaging application use in dermatology. *International Journal of Dermatology*. 2019;58(10):e206-e7.
- 32
- 33 63. Fontanarosa PB, Bauchner H, Golub RM. Thank You to Peer Reviewers, Authors, and Readers of JAMA. *JAMA - Journal of the American Medical Association*. 2019;321(11):1057-8.
- 34
- 35 64. Doctors should use caution when tweeting. *For the Record (Great Valley Publishing Company, Inc)*. 2011;23(6):30-.
- 36
- 37 65. Clinicians Lack Guidance for Social Media Disclosures. *For the Record (Great Valley Publishing Company, Inc)*. 2013;25(1):8-9.
- 38
- 39 66. Frankish K, Ryan C, Harris A. Psychiatry and online social media: potential, pitfalls and ethical guidelines for psychiatrists and trainees. *Australasian Psychiatry*. 2012;20(3):181-7.
- 40
- 41 67. Galbraith KL. Practical and Ethical Considerations for Using Social Media in Community Consultation and Public Disclosure Activities Consideraciones Prácticas y Éticas para el Uso de los Medios Sociales en las Consultas a la Comunidad y la. *Academic Emergency Medicine*. 2014;21(10):1151-7.
- 42
- 43 68. Gifford ED, Mouawad NJ, Bowser KE, Bush RL, Chandra V, Coleman DM, et al. Society for Vascular Surgery best practice recommendations for use of social media. *Journal of vascular surgery*. 2021;74(6):1783-91.e1.
- 44
- 45 69. Gilligan JT, Gologorsky Y. #Fake News: Scientific Research in the Age of Misinformation. *World Neurosurgery*. 2019;131:284.
- 46
- 47 70. Gordon D. Blogging for medical communication professionals. *AMWA Journal: American Medical Writers Association Journal*. 2010;25(2):83-.
- 48
- 49
- 50
- 51
- 52
- 53
- 54
- 55
- 56
- 57
- 58
- 59
- 60

- 1
- 2
- 3
- 4 71. Gottlieb M, Dyer S. Information and Disinformation: Social Media in the COVID-19 Crisis. *Academic Emergency Medicine*. 2020;27(7):640-1.
- 5
- 6 72. Grace PJ. Nurses Spreading Misinformation. *The American journal of nursing*. 2021;121(12):49-53.
- 7
- 8 73. Grummer-Strawn LM, Holliday F, Jungo KT, Rollins N. Sponsorship of national and regional professional paediatrics associations by companies that make breast-milk substitutes: Evidence from a review of official websites. *BMJ Open*. 2019;9(8).
- 9
- 10 74. Guo LN, Nambudiri V. 18230 The landscape of podcasting in dermatology: A descriptive analysis. *Journal of the American Academy of Dermatology*. 2020;83(6):AB94.
- 11
- 12 75. Gupta N, Dorfman R, Saadat S, Roostaeian J. The Plastic Surgery Social Media Influencer: Ethical Considerations and a Literature Review. *Aesthetic surgery journal*. 2020;40(6):691-9.
- 13
- 14 76. Haddas R, Samtani R, Webb AJ, Burleson JR, Berven SH, Theologis AA, et al. P72. Spine surgeons social dilemma: Benefits and risks of social media for spine surgery practice in the 21st century. *Spine Journal*. 2021;21(9):S174-S5.
- 15
- 16 77. Halder S. Advertisement vis-a-vis medical profession. *Journal of the Indian Medical Association*. 2010;108(2):77.
- 17
- 18 78. Hampton T, Hampton T. NIH eases ethics rules on employees: consulting ban to remain. *JAMA: Journal of the American Medical Association*. 2005;294(14):1749-50.
- 19
- 20 79. Hanley KJ. A blessing and a curse. *The New York state dental journal*. 2012;78(2):4-5.
- 21
- 22 80. Harris R. Blog spot. A massive opportunity for the profession. *Synergy News*. 2012:2-.
- 23
- 24 81. Henderson ML, Chevinsky J. Medical ethics and the media: the value of a story. *The virtual mentor : VM*. 2014;16(8):642-7.
- 25
- 26 82. Henderson ML, Herbst L, Love AD. Social Media and Kidney Transplant Donation in the United States: Clinical and Ethical Considerations When Seeking a Living Donor. *American Journal of Kidney Diseases*. 2020;76(4):583-5.
- 27
- 28 83. Henry RK, Pieren JA. The use of social media in dental hygiene programs: a survey of program directors. *Journal of dental hygiene : JDH*. 2014;88(4):243-9.
- 29
- 30 84. Hernández-Aguado I, Chilet-Rosell E. The role of the media in the health policymaking process: perspectives of key actors in Spain. *Critical Public Health*. 2020;30(3):270-9.
- 31
- 32 85. Hessari NM, Van Schalkwyk MC, Thomas S, Petticrew M. Reply to comment on maani hessari, n.; van schalkwyk, m.c.; thomas, s.; petticrew, m. alcohol industry csr organisations: What can their twitter activity tell us about their independence and their priorities? a comparative analysis. *int. j. environ. res. public health* 2019, 16, 892. *International Journal of Environmental Research and Public Health*. 2019;16(14).
- 33
- 34 86. Hetzler PT, Makar KG, Baker SB, Fan KL, Vercler CJ. Time for a Consensus? Considerations of Ethical Social Media Use by Pediatric Plastic Surgeons. *Plastic and reconstructive surgery*. 2020;146(6):841e-2e.
- 35
- 36 87. Holden A. Social media and professionalism: does the profession need to re-think the parameters of professionalism within social media? *Australian dental journal*. 2017;62(1):23-9.
- 37
- 38 88. Huby K, Smith J. Relevance of social media to nurses and healthcare: 'to tweet or not to tweet'. *Evidence-based nursing*. 2016;19(4):105-6.
- 39
- 40 89. Hwang Y, Jeong S-H. "This is a sponsored blog post, but all opinions are my own": The effects of sponsorship disclosure on responses to sponsored blog posts. *Computers in Human Behavior*. 2016;62:528-35.
- 41
- 42 90. Hwong AR, Qaragholi N, Carpenter D, Joffe S, Campbell EG, Soleymani Lehmann L. A Systematic Review of State and Manufacturer Physician Payment Disclosure Websites: Implications for Implementation of the Sunshine Act. *Journal of Law, Medicine & Ethics*. 2014;42(2):208-19.
- 43
- 44
- 45
- 46
- 47
- 48
- 49
- 50
- 51
- 52
- 53
- 54
- 55
- 56
- 57
- 58
- 59
- 60



- 1
- 2
- 3
- 4 91. Islam SMS, Tabassum R, Liu Y, Chen S, Redfern J, Kim SY, et al. The role of social media in
- 5 preventing and managing non-communicable diseases in low-and-middle income countries: Hope or
- 6 hype? *Health Policy and Technology*. 2019;8(1):96-101.
- 7 92. Jiang XS, Madrigal E, Roy-Chowdhuri S. A Twitter primer: Dos and don'ts for cytopathologists.
- 8 *Diagnostic Cytopathology*. 2017;45(7):577-9.
- 9 93. Jones DM, Guy MC, Soule E, Sakuma K-LK, Pokhrel P, Orloff M, et al. Characterization of
- 10 Electronic Cigarette Warning Statements Portrayed in YouTube Videos. *Nicotine & tobacco research*.
- 11 2021;23(8):1358-66.
- 12 94. Joshi KG. How to best use digital technology to help your patients. *Current Psychiatry*.
- 13 2020;19(7):47.
- 14 95. Facebook: A Bibliographic Analysis of the PsycINFO Database. *Journal of Instructional Psychology*.
- 15 2012;39(1):63-5.
- 16 96. WMA Guidelines on Promotional Mass Media Appearances by Physicians. *Journal of Korean*
- 17 *medical science*. 2015;30(12):1715.
- 18 97. Katz MS. Social media and medical professionalism: The need for guidance. *European Urology*.
- 19 2014;66(4):633-4.
- 20 98. Kh, pur S, Pahwa P. Conflict of interest. *Indian Journal of Dermatology, Venereology & Leprology*.
- 21 2009;75(3):225-8.
- 22 99. Kirschner KL, Blake V, Hahn D, Timimi FK, Huang M. Social Media: Boon or Boondoggle for Health
- 23 Care Professionals? *PM and R*. 2013;5(4):335-9.
- 24 100. Kleebauer A. New code of conduct a step closer as nurses' feedback taken on board. *Nursing*
- 25 *standard (Royal College of Nursing (Great Britain) : 1987)*. 2014;29(3):9.
- 26 101. Knoepfler PS. When patients reach out, scientists should reach back carefully. *Nature Medicine*.
- 27 2016;22(3):230.
- 28 102. Knopf A. Ashley pulls lending website after Twitter scuffle. *Alcoholism & Drug Abuse Weekly*.
- 29 2018;30(46):3-4.
- 30 103. Korman AM, Fabbro SK. Direct-to-consumer pharmaceutical services in dermatology: Ethical
- 31 implications. *Journal of the American Academy of Dermatology*. 2021;85(4):1067-8.
- 32 104. Kullgren JT, Harkins KA, Bellamy SL, Gonzales A, Tao Y, Zhu J, et al. A Mixed-Methods Randomized
- 33 Controlled Trial of Financial Incentives and Peer Networks to Promote Walking Among Older Adults.
- 34 *Health Education & Behavior*. 2014;41(1):435-50S.
- 35 105. Kunze KN, Polce EM, Vadhera A, Williams BT, Nwachukwu BU, Nho SJ, et al. What Is the
- 36 Predictive Ability and Academic Impact of the Altmetrics Score and Social Media Attention? *American*
- 37 *Journal of Sports Medicine*. 2020;48(5):1056-62.
- 38 106. Lachman VD. Social Media: Managing the Ethical Issues. *Med-Surg Matters*. 2013;22(5):326-9.
- 39 107. Lackner Marx J. Point-Counterpoint: Industry Sponsorship of CME. *AMWA Journal: American*
- 40 *Medical Writers Association Journal*. 2012;27(1):20-1.
- 41 108. Lagu T, Greysen SR. Physician, monitor thyself: professionalism and accountability in the use of
- 42 social media. *Journal of Clinical Ethics*. 2011;22(2):187-90.
- 43 109. Layng J. From our facebook page. *Today in PT*. 2012;6(3):10-.
- 44 110. Lazard AJ. Design cues for tobacco communication: Heuristic interpretations and usability of
- 45 online health information about harmful chemicals. *International Journal of Medical Informatics*.
- 46 2020;141:104177.
- 47 111. Lee S, Choeh JY. The determinants of helpfulness of online reviews. *Behaviour & Information*
- 48 *Technology*. 2016;35(10):853-63.
- 49 112. Lee A, Morling J. COVID19: The need for public health in a time of emergency. *Public Health*.
- 50 2020;182:188-9.
- 51
- 52
- 53
- 54
- 55
- 56
- 57
- 58
- 59
- 60

- 1  
2  
3 113. Lerner BH. Policing online professionalism: Are we too alarmist? *JAMA Internal Medicine*. 2013;173(19):1767-8.
- 4  
5 114. Lin W-Y, Zhang X, Song H, Omori K. Health information seeking in the Web 2.0 age: Trust in social  
6 media, uncertainty reduction, and self-disclosure. *Computers in Human Behavior*. 2016;56:289-94.
- 7  
8 115. Lulis I, Moss S. Health care, research benefit from funds. *ASHA Leader*. 2009;14(6):1-8.
- 9  
10 116. Macauley R, Elster N, Fanaroff JM, Comm Med Liability Risk M, Comm B, Committee On  
11 Bioethics COML, et al. Ethical considerations in pediatricians' use of social media. *Pediatrics (Evanston)*.  
12 2021;147(3):1.
- 13  
14 117. MacWilliam L. Media bias, conflicts of interest: distort study findings on supplements. *Life*  
15 *Extension*. 2006;12(6):58-68.
- 16  
17 118. Mansfield SJ, Morrison SG, Stephens HO, Bonning MA, Wang SH, Withers AH, et al. Social media  
18 and the medical profession. *Medical Journal of Australia*. 2011;194(12):642-4.
- 19  
20 119. Margaret E, Yip W, Mehta MD, Samplaski MK. Male infertility websites: what are our patients  
21 reading? *Fertility and Sterility*. 2019;112(3):e422-e3.
- 22  
23 120. Mayes C, Williams J, Lipworth W. Conflicted hope: social egg freezing and clinical conflicts of  
24 interest. *Health Sociology Review*. 2018;27(1):45-59.
- 25  
26 121. McCarthy CP, DeCamp M, McEvoy JW. The Reply. *The American journal of medicine*.  
27 2018;131(11):e473.
- 28  
29 122. McComas KA. The role of trust in health communication and the effects of conflicts of interest  
30 among scientists. *Proceedings of the Nutrition Society*. 2008;67(4):428-36.
- 31  
32 123. McCullough M. One Size Does Not Fit All: The Ethical Imperative to Limit the Concept of  
33 Research Exceptionalism. *American Journal of Bioethics*. 2010;10(8):60-1.
- 34  
35 124. DOT-COM. *Medical Marketing & Media*. 2016;51(8):22-.
- 36  
37 125. Militello M, Yang RA, Anderson JB, Szeto MD, Presley CL, Laughter MR. Social Media and Ethical  
38 Challenges for the Dermatologist. *Current dermatology reports*. 2021;10(4):120-7.
- 39  
40 126. Milton CL. Ethics and social media. *Nursing science quarterly*. 2014;27(4):283-5.
- 41  
42 127. Milton CL. Power with Social Media: A Nursing Perspective. *Nursing science quarterly*.  
43 2016;29(2):113-5.
- 44  
45 128. Milton CL. The Ethics of Scholarship With Social Media. *Nursing science quarterly*.  
46 2018;31(4):330-2.
- 47  
48 129. Minhas R. New ethical framework for pharmaceutical physicians [6]. *British Medical Journal*.  
49 2006;332(7548):1034.
- 50  
51 130. Some plastic surgeons' social media antics raise eyebrows. *Modern Healthcare*.  
52 2017;47(43):0044-.
- 53  
54 131. Moodley K. Generalism in healthcare: Ethical challenges in the 21st century. *South African Family*  
55 *Practice*. 2013;55(5):410-1.
- 56  
57 132. Moses RE, McNeese LG, Feld LD, Feld AD. Social media in the health-care setting: Benefits but  
58 also a minefield of compliance and other legal issues. *American Journal of Gastroenterology*.  
59 2014;109(8):1128-32.
- 60 133. Moukarzel S, Caduff A, Rehm M, Del Fresno M, Pérez-Escamilla R, Daly AJ. Breastfeeding  
communication strategies, challenges and opportunities in the twitter-verse: Perspectives of influencers  
and social network analysis. *International journal of environmental research and public health*.  
2021;18(12):6181.
134. Murakami M, Kumagai A, Stojarov AN, Tsubokura M. Radiation is not a political tool. *Science*.  
2019;366(6465):581-2.
135. Muzumdar S, Grant-Kels JM, Farshchian M. Ethics of social media marketing by dermatologists.  
*Journal of the American Academy of Dermatology*. 2021;85(1):277-8.

136. Naeem SB, Bhatti R, Khan A. An exploration of how fake news is taking over social media and putting public health at risk. *Health information and libraries journal*. 2021;38(2):143-9.
137. Nau JY. When Facebook threatens the ethics of clinical trials. *Revue Medicale Suisse*. 2017;13(588):2098-9.
138. Neuer K, Angenendt A. The clinical trial in the area of conflict among real world data, social media and data protection - Quo vadis? Report on the 26th Symposium of the Federal Association of Contract Research Organizations (BVMA e. V.) on November 23, 2018 in Munich. *Pharmazeutische Industrie*. 2019;81(2):224-30.
139. Neville P, Waylen A. Social media and dentistry: some reflections on e-professionalism. *British dental journal*. 2015;218(8):475-8.
140. Neville P. Clicking on professionalism? Thoughts on teaching students about social media and its impact on dental professionalism. *European journal of dental education : official journal of the Association for Dental Education in Europe*. 2016;20(1):55-8.
141. News and ethics resources. *Nursing Ethics*. 2015;22(1):153-5.
142. TWEETS OF THE WEEK. *Nursing Standard*. 2016;30(51):30-.
143. Social networking: avoiding the pitfalls. *Nursing times*. 2011;107(37):15.
144. O'Glasser AY, Jaffe RC, Brooks M. To Tweet or Not to Tweet, That Is the Question. *Seminars in nephrology*. 2020;40(3):249-63.
145. O'Hanlon S, Shannon B. Comments further to: privacy, professionalism and Facebook: a dilemma for young doctors. *Medical education*. 2011;45(2):209.
146. O'Keeffe M, Barratt A, Maher C, Zadro J, Fabbri A, Jones M, et al. Media Coverage of the Benefits and Harms of Testing the Healthy: A protocol for a descriptive study. *BMJ Open*. 2019;9(8).
147. O'Rourke PP, Carrithers J, Patrick-Lake B, Rice TW, Corsmo J, Hart R, et al. Harmonization and streamlining of research oversight for pragmatic clinical trials. *Clinical Trials*. 2015;12(5):449-56.
148. Best of the Blogs. *Oncology (08909091)*. 2012;26(9):814-5.
149. Ong EG, Davis L, Sanchez A, Curiel R, Stohl H, Nelson A, et al. A COMPREHENSIVE REVIEW OF WOMEN'S QUESTIONS FOLLOWING MISCARRIAGE on DIFFERENT SOCIAL MEDIA PLATFORMS. *Journal of Investigative Medicine*. 2021;70:197.
150. At a glance. Cleveland Clinic posts MD-industry ties. *OR Manager*. 2009;25(1):32-.
151. Oransky I. Web: bloggers beware: conflicts of interest and diabetes. *Lancet*. 2006;368(9548):1641-2.
152. Ornstein C. Cardiac Society Draws Bulk of Funding from Stent Makers. *Gerson Healing Newsletter*. 2011;26(5):4-.
153. Padeiro M, Bueno-Larraz B, Freitas Â. Local governments' use of social media during the COVID-19 pandemic: The case of Portugal. *Government information quarterly*. 2021;38(4).
154. Pagoto S, Nebeker C. How scientists can take the lead in establishing ethical practices for social media research. *Journal of the American Medical Informatics Association*. 2019;26(4):311-3.
155. Parasidis E, Pike E, McGraw D. A belmont report for health data. *New England Journal of Medicine*. 2019;380(16):1493-5.
156. Paterson D. Telemedicine and conflicts of interest [2]. *Veterinary Record*. 2019;185(7):209.
157. Peltier B, Curley A. The ethics of social media in dental practice: ethical tools and professional responses. *Journal of the California Dental Association*. 2013;41(7):507-13.
158. Pelton RW, Newsom TH. Is it advantageous for physicians to use social media to enhance their online presence and reputation? *Ocular Surgery News*. 2012;30(17):11-.
159. Pierce G. Payment Options in Step with the Times. *Podiatry Management*. 2019;38(8):87-90.
160. Prasad V. Inconsistent Reporting of Potential Conflicts of Interest. *JAMA Internal Medicine*. 2018;178(10):1424-5.

- 1  
2  
3 161. Prateek S, Tak H. Social media and physicians: the Indian scenario. *Indian journal of medical ethics*. 2018;3(1):83.
- 4  
5 162. Ragan MR. Social media in the health care provider office. *Today's FDA : official monthly journal of the Florida Dental Association*. 2012;24(4):20-3.
- 6  
7 163. Ranpariya V, Chu B, Fathy R, Lipoff JB. Dermatology without dermatologists? Analyzing Instagram influencers with dermatology-related hashtags. *Journal of the American Academy of Dermatology*. 2020;83(6):1840-2.
- 8  
9 164. Ravn S, Barnwell A, Barbosa Neves B. What Is “Publicly Available Data”? Exploring Blurred Public–Private Boundaries and Ethical Practices Through a Case Study on Instagram. *Journal of empirical research on human research ethics*. 2020;15(1-2):40-5.
- 10  
11 165. Rechenberg U, Josten C, Grüner S, Klima S. How does our specialty present itself on the Internet? *Zeitschrift für Orthopädie und Unfallchirurgie*. 2013;151(4):394.
- 12  
13 166. Redick DW, Hwang JC, Kloosterboer A, Yannuzzi NA, Patel NA, Kuriyan AE, et al. Content, Readability, and Accountability of Freely Available Online Information for Patients Regarding Epiretinal Membranes. *Seminars in ophthalmology*. 2022;37(1):67-70.
- 14  
15 167. New FDA guidance on clinical investigator financial disclosure. *Research Practitioner*. 2011;12(4):143-9.
- 16  
17 168. Roucka TM, Donate-Bartfield E, Zarkowski P. In social media age, watch what you say. *General dentistry*. 2014;62(1):19-21.
- 18  
19 169. Rouprêt M, Morgan TM, Bostrom PJ, Cooperberg MR, Kutikov A, Linton KD, et al. European Association of Urology (@Uroweb) recommendations on the appropriate use of social media. *European Urology*. 2014;66(4):628-32.
- 20  
21 170. Samsa G, Solomon A. Managing the science in the presence of financial conflict of interest. *Accountability in Research*. 2019;26(6):397-403.
- 22  
23 171. Santillan-Doherty P, Grether-Gonzalez P, Medina-Arellano MJ, Chan S, Tapia-Ibarguengoitia R, Brena-Sesma I, et al. Considerations on genetic engineering: regarding the birth of twins subjected to gene edition. *Gaceta Medica de Mexico*. 2020;156(1):53-9.
- 24  
25 172. Santoro E. Social media and health communication: Do we need rules? *Recenti Progressi in Medicina*. 2015;106(1):15-6.
- 26  
27 173. Santoro E. [Social media and health: it's time to refine the methodology for interpreting studies and evaluating information.]. *Social media e salute: affinare la metodologia per interpretare e valutare le informazioni*. 2022;113(2):73-5.
- 28  
29 174. Sartor O. Conflicts of Interest, Baselga, and Clinical Trialists. *Oncologist*. 2018;23(12):1394-.
- 30  
31 175. Scruth EA, Pugh DM, Adams CL, Foss-Durant AM. Electronic and social media: the legal and ethical issues for healthcare. *Clinical nurse specialist CNS*. 2015;29(1):8-11.
- 32  
33 176. Seppey M, Ridde V, Touré L, Coulibaly A. Donor-funded project's sustainability assessment: a qualitative case study of a results-based financing pilot in Koulikoro region, Mali. *Globalization & Health*. 2017;13:1-15.
- 34  
35 177. Sh, J, Turner S. System wide collaboration? Health and social care leaders' perspectives on working across boundaries. *Journal of Integrated Care*. 2019;27(1):83-94.
- 36  
37 178. Sharma P, Francis DP. Social media influencers in cardiology/metabolism—a force for good or evil? *Heart and Metabolism*. 2020(82):36-40.
- 38  
39 179. Shore R, Halsey J, Shah K, Crigger B-J, Douglas SP. Report of the AMA Council on Ethical and Judicial Affairs: professionalism in the use of social media. *Journal of Clinical Ethics*. 2011;22(2):165-72.
- 40  
41 180. Silva DAF, Colleoni R. Patient's privacy violation on social media in the surgical area. *American Surgeon*. 2018;84(12):1900-5.
- 42  
43 181. Sissung TM, Figg WD. Facebook groups for alternative treatments for cancer: advertising masquerading as community support. *The lancet oncology*. 2021;22(1):25-6.
- 44  
45  
46  
47  
48  
49  
50  
51  
52  
53  
54  
55  
56  
57  
58  
59  
60

- 1  
2  
3 182. Slagle E, Sinacore J, Brubaker L. Conflict of interest disclosure in obstetrics & gynecology. *Obstetrics & Gynecology*. 2011;118(5):1108-10.
- 4  
5 183. Smyth D. Web words. Breaking bad news: part 2. *International Journal of Palliative Nursing*. 2005;11(1):46-.
- 6  
7 184. Snyder L. Online professionalism: social media, social contracts, trust, and medicine. *Journal of Clinical Ethics*. 2011;22(2):173-5.
- 8  
9 185. Studenic P, Stones S, Alunno A, Ritschl V, Nikiphorou E. People with rheumatic and musculoskeletal diseases connect and learn about health-related issues using social media. *Annals of the Rheumatic Diseases*. 2019;78:2078.
- 10  
11 186. Swartz MK. Professional Conduct and Social Media. *Journal of pediatric health care : official publication of National Association of Pediatric Nurse Associates & Practitioners*. 2016;30(3):185-6.
- 12  
13 187. Tanchuco JQ. Pandemic publication ethics. *Phillippine Journal of Internal Medicine*. 2020;58(3):1-3.
- 14  
15 188. Technology, Practice Committees of the American Society for Reproductive M, the Advertising Committee of the Society for Assisted Reproductive T, Technology, Practice Committees of the American Society for Reproductive M, the Advertising Committee of the Society for Assisted Reproductive Technology. Electronic address Aao. Guidance on the use of social media in reproductive medicine practice. *Fertility and sterility*. 2021;115(5):1151-5.
- 16  
17 189. Terrasse M, Gorin M, Sisti D. Social Media, E-Health, and Medical Ethics. *Hastings Center Report*. 2019;49(1):24-33.
- 18  
19 190. What nurses are saying. *The American nurse*. 2015;47(1):10.
- 20  
21 191. Tulloch J, Zinn J. Risk, health and the media. *Health, Risk & Society*. 2011;13(1):1-16.
- 22  
23 192. van Cauwenberghe CE. Stakeholders portrait in the pharmaceutical industry. C. E. van Cauwenberghe, Frost and Sullivan, United States2012 2012. 38-44 p.
- 24  
25 193. Van Eperen L, Marincola FM, Strohm J. Bridging the divide between science and journalism. *Journal of Translational Medicine*. 2010;8:25.
- 26  
27 194. Varghese TK, Entwistle JW, Mayer JE, Moffatt-Bruce SD, Sade RM. Ethical standards for cardiothoracic surgeons' participation in social media. *The Journal of thoracic and cardiovascular surgery*. 2019;158(4):1139-43.
- 28  
29 195. Varghese TK, Entwistle JW, Mayer JE, Moffatt-Bruce SD, Sade RM, Blitzer D, et al. Ethical Standards for Cardiothoracic Surgeons' Participation in Social Media. *The Annals of thoracic surgery*. 2019;108(3):666-70.
- 30  
31 196. Vogel EA, Guillory J, Ling PM. Sponsorship Disclosures and Perceptions of E-cigarette Instagram Posts. *Tobacco regulatory science*. 2020;6(5):355-68.
- 32  
33 197. Wagner L, Paquin R, Persky S. Genetics blogs as a public health tool: Assessing credibility and influence. *Public Health Genomics*. 2012;15(3-4):218-25.
- 34  
35 198. Wallen B. NYSCHP Corporate Sponsor Scholarship Essay Award: Social Media, Friend or Foe? *Journal of Pharmacy Practice*. 2013;26(4):454-5.
- 36  
37 199. Wang Z, Wang S, Zhang Y, Jiang X. Social media usage and online professionalism among registered nurses: A cross-sectional survey. *International Journal of Nursing Studies*. 2019;98:19-26.
- 38  
39 200. Wayant C, Turner E, Meyer C, Sinnett P, Vassar M. Financial Conflicts of Interest Among Oncologist Authors of Reports of Clinical Drug Trials. *JAMA Oncology*. 2018;4(10):1426-8.
- 40  
41 201. Weijs C, Majowicz S, Coe JB, Desmarais S, Jones-Bitton A. The personal use of Facebook by public health professionals in Canada: Implications for public health practice. *Journal of Communication in Healthcare*. 2017;10(1):8-15.
- 42  
43 202. Weijs C, Coe J, Desmarais S, Majowicz S, Jones-Bitton A. Effects of Mock Facebook Workday Comments on Public Perception of Professional Credibility: A Field Study in Canada. *Journal of Medical Internet Research*. 2019;21(4):N.PAG-N.PAG.
- 44  
45  
46  
47  
48  
49  
50  
51  
52  
53  
54  
55  
56  
57  
58  
59  
60



- 1  
2  
3 203. Weinstein ALBS, Saadeh PBMD, Warren SMMDF. Social networking services: Implications for the  
4 next generation of physicians. *Surgery*. 2011;150(1):15-6.  
5 204. Wheelock A, Ives J. Vaccine confidence, public understanding and probity: time for a shift in  
6 focus? *Journal of medical ethics*. 2021;48(4):250-5.  
7 205. White E. Funding for research. *Mental Health Occupational Therapy*. 2007;12(3):93-  
8 206. Wilkinson J. Accessible, Dynamic Web Content Using Instagram. *Information Technology &*  
9 *Libraries*. 2018;37(1):19-26.  
10 207. Williams JB, Mathews R, D'Amico TA. "Reality surgery" a research ethics perspective on the live  
11 broadcast of surgical procedures. *Journal of Surgical Education*. 2011;68(1):58-61.  
12 208. Wisniewski J. A Matter of Trust: A Webmaster Perspective. *Online Searcher*. 2017;41(4):66-8.  
13 209. Yan Q, Goei C, Jensen K, Langley A, Pounds L, Davies M. Quality and Readability of Online Patient  
14 Resources for Varicose Veins—Do We Know What Is Out There? *Journal of Vascular Surgery: Venous and*  
15 *Lymphatic Disorders*. 2020;8(2):330.  
16 210. Yeh RW. Academic Cardiology and Social Media: Navigating the Wisdom and Madness of the  
17 Crowd. *Circulation: Cardiovascular Quality & Outcomes*. 2018;11(4):1-3.  
18 211. Yeo S, Eigl B, Ingledew PA. A fountain of knowledge? The quality of online resources for testicular  
19 cancer patients. *Canadian Urological Association Journal*. 2020;23:23.  
20 212. Zember WF, Fishman EK, Horton KM, Raman SP. How social media can impact medicine and  
21 radiology. *Journal of the American College of Radiology*. 2015;12(6):620-1.  
22 213. Zenone M, Kenworthy N, Barbic S. The Paradoxical Relationship Between Health Promotion and  
23 the Social Media Industry. *Health promotion practice*. 2021:15248399211064640.  
24 214. Zhitomirsky-Geffet M, Bratspiess Y. Professional information disclosure on social networks: The  
25 case of Facebook and Linked In in Israel. *Journal of the Association for Information Science & Technology*.  
26 2016;67(3):493-504.  
27 215. Zhou J, Bercovitch L. Instagram and the dermatologist: An ethical analysis. *Journal of the*  
28 *American Academy of Dermatology*. 2018;78(6):1226-8.  
29  
30  
31  
32  
33  
34  
35  
36  
37  
38  
39  
40  
41  
42  
43  
44  
45  
46  
47  
48  
49  
50  
51  
52  
53  
54  
55  
56  
57  
58  
59  
60

## Supplementary file 5: Characteristics of the 17 included studies related to conflicts of interest.

| Author, Year        | Date of search/data collection | Start Upload Date | End Upload Date | Period of coverage | Population                                                                                                                                                                        | Study outcomes                         | Funding of the study | COI of study authors | Country of study authors | Country of the subjects of study | Type of social media             | Focus                                                                               | Language of posts    | Subject of COI                                                                                            | Type of COI   | Sources of COI | Tools to assess the presence of COI | Results                                                                                                                                                                                                                                                                                                                                                                                                                                           |
|---------------------|--------------------------------|-------------------|-----------------|--------------------|-----------------------------------------------------------------------------------------------------------------------------------------------------------------------------------|----------------------------------------|----------------------|----------------------|--------------------------|----------------------------------|----------------------------------|-------------------------------------------------------------------------------------|----------------------|-----------------------------------------------------------------------------------------------------------|---------------|----------------|-------------------------------------|---------------------------------------------------------------------------------------------------------------------------------------------------------------------------------------------------------------------------------------------------------------------------------------------------------------------------------------------------------------------------------------------------------------------------------------------------|
| Betschart 2020 [22] | May 2019                       | July 2007         | May 2019        | 12 years           | Cross-sectional: Survey of 159 YouTube videos addressing treatment options for lower urinary tract symptoms with benign prostatic hyperplasia                                     | Frequency of reporting of COI          | Not reported         | None                 | Switzerland and Germany  | Not reported                     | YouTube                          | Urology: lower urinary tract symptoms associated with benign prostatic hyperplasia. | English              | Physicians, clinic, hospital, or university<br><br>Others: Industry, news media, societies/or ganizations | Not specified | Not specified  | None                                | <ul style="list-style-type: none"> <li>1.3% (2/159) videos included a disclosure of conflicts of interest</li> <li>83.6% (133/159) of the videos were subject to commercial bias (defined as information presented in a manner that attempts to sway participants' opinions in favor of a particular commercial product for the express purpose of furthering a commercial entity's business, meaning a deliberate intent to mislead).</li> </ul> |
| Chretien 2009 [30]  | March/April 2009               | N/A               | N/A             | N/A                | Cross-sectional: Electronic survey of 78 deans of student affairs, their representatives, or counterparts from US medical schools in the Association of American Medical Colleges | Unprofessional incidents involving COI | Not reported         | None                 | United States            | United States                    | Web 2.0: not specified otherwise | General                                                                             | English <sup>1</sup> | Medical students                                                                                          | Not specified | Industry       | None                                | <ul style="list-style-type: none"> <li>4% (2/46) of all reported unprofessional incidents involved conflicts of interest (e.g., product endorsement without a COI disclosure)</li> </ul>                                                                                                                                                                                                                                                          |
| Chretien 2011[21]   | May 2010                       | May 1, 2010       | May 31, 2010    | 1 month            | Cross-sectional:                                                                                                                                                                  | Unprofessional                         | Not reported         | None                 | United States            | United States,                   | Twitter                          | General: surgery,                                                                   | English              | Physicians                                                                                                | Not specified | Industry       | None                                | <ul style="list-style-type: none"> <li>8.3% (12/144) of unprofessional tweets</li> </ul>                                                                                                                                                                                                                                                                                                                                                          |

1  
2  
3  
4  
5  
6  
7  
8  
9  
10  
11  
12  
13  
14  
15  
16  
17  
18  
19  
20  
21  
22  
23  
24  
25  
26  
27  
28  
29  
30  
31  
32  
33  
34  
35  
36  
37  
38  
39  
40  
41  
42  
43  
44  
45  
46  
47  
48  
49  
50  
51  
52  
53  
54  
55  
56  
57  
58  
59  
60

|                   |               |              |               |        |                                                                                                   |                                                |                                                                                     |                                                                                                                                                                        |                |                                                |               |                                                                                                                          |                      |                                                                        |                                 |                    |      |                                                                                                                                                                                                                                                                        |
|-------------------|---------------|--------------|---------------|--------|---------------------------------------------------------------------------------------------------|------------------------------------------------|-------------------------------------------------------------------------------------|------------------------------------------------------------------------------------------------------------------------------------------------------------------------|----------------|------------------------------------------------|---------------|--------------------------------------------------------------------------------------------------------------------------|----------------------|------------------------------------------------------------------------|---------------------------------|--------------------|------|------------------------------------------------------------------------------------------------------------------------------------------------------------------------------------------------------------------------------------------------------------------------|
|                   |               |              |               |        | Survey of 5156 tweets of 260 self-identified physicians with >500 followers                       | tweets involving 'possible' COI                |                                                                                     |                                                                                                                                                                        |                | Europe, Canada, Asia, Australia, not specified |               | internal medicine, family medicine, pediatrics, psychiatry, emergency medicine, obstetrics/gynecology, and not specified |                      |                                                                        |                                 |                    |      | involved 'possible' conflicts of interest (i.e., making unsupported claims about a product being sold on the physician's website or repeatedly promoting specific health products)                                                                                     |
| Greysen 2012 [10] | N/A           | N/A          | N/A           | N/A    | Cross-sectional: Survey of 48 executive directors of all medical and osteopathic boards in the US | Unprofessional incidents involving COI         | Funded by the Robert Wood Johnson Foundation and the Department of Veterans Affairs | 1/5 reported serving as a scientific advisory board member for Fair Health Inc and receiving funding as a collaborator on the Yale University Open Data Access project | United States  | United States                                  | Not specified | General                                                                                                                  | English <sup>1</sup> | Physicians                                                             | Not specified                   | Not specified      | None | <ul style="list-style-type: none"> <li>56% of state medical boards indicated that they received reports of violations related to "failure to reveal conflicts of interest online" (estimated percentage from the figure)</li> </ul>                                    |
| Hessari 2019 [31] | December 2016 | January 2016 | December 2016 | 1 year | Cross-sectional: Survey of a total of 2805 tweets of Alcohol industry (AI)-                       | Association between COI and content of posting | None                                                                                | None                                                                                                                                                                   | United Kingdom | United Kingdom, Ireland, Australia             | Twitter       | Social aspects/public relations organizations related to alcohol                                                         | English <sup>1</sup> | Alcohol industry (AI)-funded organizations and non-AI-funded charities | Sponsorship by alcohol industry | Alcohol industries | None | <ul style="list-style-type: none"> <li>None (0/1156) of alcohol-industry funded organizations tweets mentioned alcohol marketing, advertising, and sponsorship; issues related to alcohol pricing; physical health harms, including cancers, heart disease,</li> </ul> |





1  
2  
3  
4  
5  
6  
7  
8  
9  
10  
11  
12  
13  
14  
15  
16  
17  
18  
19  
20  
21  
22  
23  
24  
25  
26  
27  
28  
29  
30  
31  
32  
33  
34  
35  
36  
37  
38  
39  
40  
41  
42  
43  
44  
45  
46  
47  
48  
49  
50  
51  
52  
53  
54  
55  
56  
57  
58  
59  
60

|                     |                        |                 |                   |        |                                                                          |                                                        |                                                                                  |              |               |               |                                                                               |                    |                      |                                                                                                              |                                                                                                                        |                                                                   |                        |                                                                                                                                                                                                                                                                                                                                                                                                                                                                          |
|---------------------|------------------------|-----------------|-------------------|--------|--------------------------------------------------------------------------|--------------------------------------------------------|----------------------------------------------------------------------------------|--------------|---------------|---------------|-------------------------------------------------------------------------------|--------------------|----------------------|--------------------------------------------------------------------------------------------------------------|------------------------------------------------------------------------------------------------------------------------|-------------------------------------------------------------------|------------------------|--------------------------------------------------------------------------------------------------------------------------------------------------------------------------------------------------------------------------------------------------------------------------------------------------------------------------------------------------------------------------------------------------------------------------------------------------------------------------|
|                     |                        |                 |                   |        |                                                                          |                                                        |                                                                                  |              |               |               |                                                                               |                    |                      |                                                                                                              |                                                                                                                        |                                                                   |                        | More than half of drug mentions refer to a median of six companies that pay these physicians                                                                                                                                                                                                                                                                                                                                                                             |
| Lagu 2008 [23]      | December 14, 2006      | January 1, 2006 | December 14, 2006 | 1 year | Cross-sectional: Survey of 271 health-related blogs by doctors or nurses | Frequency of reporting of COI                          | Partially funded by The Robert Wood Johnson Foundation Clinical Scholars program | None         | United States | Not reported  | Blogs (Medlogs, Yahoo Health and Medicine Blogs and The Medical Blog Network) | General            | English <sup>1</sup> | Physicians and nurses                                                                                        | Not specified                                                                                                          | Industry                                                          | None                   | <ul style="list-style-type: none"> <li>None (0/31) of the blogs that explicitly promoted a specific healthcare product (i.e., providing product images, descriptions, or advocacy) disclosed conflicts of interest.</li> </ul>                                                                                                                                                                                                                                           |
| Miller 2011 [12]    | June 2007 and May 2008 | N/A             | N/A               | N/A    | Cross-sectional: Survey of 951 health blogs                              | Frequency of reporting of COI                          | Not reported                                                                     | Not reported | United States | Not reported  | Blogs                                                                         | General            | English              | Physicians<br><br>Others: other non-physician health professionals, patient, individual, consumer, caregiver | Funding/sponsorship                                                                                                    | Corporation, Web site, medical group, foundation, or other entity | None                   | <ul style="list-style-type: none"> <li>15.6% (148/951) of health blogs reported sponsorship</li> </ul> <p>Sponsorship stratified by occupation (p=0.053):</p> <ul style="list-style-type: none"> <li>14.9% (29/194) of physicians reported sponsorship in their blogs</li> <li>19.7% (50/254) of other health professionals reported sponsorship in their blogs</li> <li>12.9% (58/451) of non-health-related occupations reported sponsorship in their blogs</li> </ul> |
| Niforatos 2019 [18] | N/A                    | June 1, 2017    | June 1, 2018      | 1 year | Cross-sectional: Survey of 31 FOAMed blogs and websites                  | Prevalence of COI<br><br>Proportion of undisclosed COI | Not reported                                                                     | None         | United States | United States | Blog posts and website entries                                                | Emergency medicine | English <sup>1</sup> | Emergency medicine physicians                                                                                | Financial: 1) compensation for services other than consulting, including serving as faculty or as a speaker at a venue | Industry                                                          | Open Payments database | <ul style="list-style-type: none"> <li>15.4% (45/292) of U.S.-based healthcare providers had FCOI in the 2017 Open Payments database.</li> <li>Of the 12 bloggers who had 'significant' FCOI (defined as general or research payments &gt;\$5,000 from a single company over a 12-month period): 0%</li> </ul>                                                                                                                                                           |

1  
2  
3  
4  
5  
6  
7  
8  
9  
10  
11  
12  
13  
14  
15  
16  
17  
18  
19  
20  
21  
22  
23  
24  
25  
26  
27  
28  
29  
30  
31  
32  
33  
34  
35  
36  
37  
38  
39  
40  
41  
42  
43  
44  
45  
46  
47  
48  
49  
50  
51  
52  
53  
54  
55  
56  
57  
58  
59  
60

|                     |             |     |     |     |                                                                                         |                               |              |      |       |       |         |                                 |          |                                                                                                                                                                                                                                                           |               |               |                                                                                                                                                                                                                                                                                                                                                                                                                                 |
|---------------------|-------------|-----|-----|-----|-----------------------------------------------------------------------------------------|-------------------------------|--------------|------|-------|-------|---------|---------------------------------|----------|-----------------------------------------------------------------------------------------------------------------------------------------------------------------------------------------------------------------------------------------------------------|---------------|---------------|---------------------------------------------------------------------------------------------------------------------------------------------------------------------------------------------------------------------------------------------------------------------------------------------------------------------------------------------------------------------------------------------------------------------------------|
|                     |             |     |     |     |                                                                                         |                               |              |      |       |       |         |                                 |          | other than a continuing education program; 2) consulting fee; 3) travel and lodging; 4) honoraria; 5) food and beverage; and (6) education.                                                                                                               |               |               | (0/12) disclosed FCOI in their FOAMed content. <ul style="list-style-type: none"> <li>General payment FCOI: Median \$191 (IQR, \$94.1–\$829) Range \$38,132</li> <li>Research payment FCOI: Median \$15,703 (IQR, \$10,262–\$72,916) Range \$127,261</li> <li>Type of FCOI: Food and beverages (85.8%), Travel and lodging (8.6%), Other services (1.9%), Honoraria (1.9%), consulting (1.2%), and education (0.6%).</li> </ul> |
| Nishizaki 2021 [24] | August 2021 | N/A | N/A | N/A | Cross-sectional: Survey of 72 YouTube videos reporting on pediatrics nocturnal enuresis | Frequency of reporting of COI | Not reported | None | Japan | Japan | YouTube | Pediatrics : nocturnal enuresis | Japanese | 1. Physicians, nurses<br>2. non-health personnel: (1) academic (authors/uploaders affiliated with research groups or universities/colleges); (2) non-physician health personnel (pharmacists/chiropractors/acupuncturists); (4) independent user (nursery | Not specified | Not specified | None <ul style="list-style-type: none"> <li>0% (0/72) of videos had a conflicts of interest declaration by the uploader</li> <li>0% (0/72) videos were judged to have a commercial bias</li> </ul>                                                                                                                                                                                                                              |

1  
2  
3  
4  
5  
6  
7  
8  
9  
10  
11  
12  
13  
14  
15  
16  
17  
18  
19  
20  
21  
22  
23  
24  
25  
26  
27  
28  
29  
30  
31  
32  
33  
34  
35  
36  
37  
38  
39  
40  
41  
42  
43  
44  
45  
46  
47  
48  
49  
50  
51  
52  
53  
54  
55  
56  
57  
58  
59  
60

|                      |              |               |               |          |                                                                                                                                                                                                                                          |                               |      |      |                      |              |         |                                                                                   |                                      |                                                                                                                                 |               |               |      |                                                                                                                                                                                                                                                                                                                                                                                                                                         |
|----------------------|--------------|---------------|---------------|----------|------------------------------------------------------------------------------------------------------------------------------------------------------------------------------------------------------------------------------------------|-------------------------------|------|------|----------------------|--------------|---------|-----------------------------------------------------------------------------------|--------------------------------------|---------------------------------------------------------------------------------------------------------------------------------|---------------|---------------|------|-----------------------------------------------------------------------------------------------------------------------------------------------------------------------------------------------------------------------------------------------------------------------------------------------------------------------------------------------------------------------------------------------------------------------------------------|
|                      |              |               |               |          |                                                                                                                                                                                                                                          |                               |      |      |                      |              |         |                                                                                   |                                      | schoolteachers/schoolteachers), and (5) patient and family                                                                      |               |               |      |                                                                                                                                                                                                                                                                                                                                                                                                                                         |
| Pratsinis, 2021 [25] | October 2019 | December 2006 | December 2018 | 12 years | Cross-sectional: 100 YouTube videos addressing treatment options of urinary stones                                                                                                                                                       | Frequency of reporting of COI | None | None | Switzerland, Germany | Not reported | YouTube | Urology: surgical treatment of urinary stones                                     | English                              | Physicians, clinic, hospital or university<br><br>Industry, consumer/patient, medical societies/or organizations and news media | Not specified | Not specified | None | <ul style="list-style-type: none"> <li>9% (9/100) of YouTube videos had a declaration of COI</li> <li>72% of all videos were issued by healthcare providers or medical industry</li> </ul>                                                                                                                                                                                                                                              |
| Pratsinis 2021 [26]  | October 2020 | January 2008  | June 2020     | 12 years | Cross-sectional: Survey of 240 YouTube videos reporting on benign prostatic hyperplasia, prostate cancer, and urinary stone disease. The 20 most viewed videos for each urological condition and language were included in the analysis. | Frequency of reporting of COI | None | None | Switzerland          | Not reported | YouTube | Urology: benign prostatic hyperplasia, prostate cancer, and urinary stone disease | English, French, German, and Italian | Physicians, clinic, hospital or university<br><br>Industry, consumer/patient, medical societies/or organizations and news media | Not specified | Not specified | None | <ul style="list-style-type: none"> <li>“Majority” of all videos did not have declaration of conflicts of interest</li> <li>Estimated percentage of COI declaration: across 12 categories, proportion of videos reporting on COI ranges from 4.4% - 35%, with a median of 19%; the total percentage of reporting of COI in the 240 videos is 19%</li> <li>No differences in reported COI for the different languages assessed</li> </ul> |

1  
2  
3  
4  
5  
6  
7  
8  
9  
10  
11  
12  
13  
14  
15  
16  
17  
18  
19  
20  
21  
22  
23  
24  
25  
26  
27  
28  
29  
30  
31  
32  
33  
34  
35  
36  
37  
38  
39  
40  
41  
42  
43  
44  
45  
46  
47  
48  
49  
50  
51  
52  
53  
54  
55  
56  
57  
58  
59  
60

|                  |                         |     |     |     |                                                                                       |                               |                                                                                                                                  |                                                               |               |               |                         |                     |                      |                                |                                                    |                                                                                                                    |                        |                                                                                                                                                                                                                                                                                                                                                                                                                                                                                                         |
|------------------|-------------------------|-----|-----|-----|---------------------------------------------------------------------------------------|-------------------------------|----------------------------------------------------------------------------------------------------------------------------------|---------------------------------------------------------------|---------------|---------------|-------------------------|---------------------|----------------------|--------------------------------|----------------------------------------------------|--------------------------------------------------------------------------------------------------------------------|------------------------|---------------------------------------------------------------------------------------------------------------------------------------------------------------------------------------------------------------------------------------------------------------------------------------------------------------------------------------------------------------------------------------------------------------------------------------------------------------------------------------------------------|
| Shrank 2011 [28] | November 17, 2010.      | N/A | N/A | N/A | Cross-sectional: Survey of 15 social networking sites (93% featured blogging)         | Frequency of reporting of COI | Funded (by a research grant from CVS Caremark and a career development award from the National Heart, Lung, and Blood Institute) | None                                                          | United States | All countries | Social network websites | Diabetes            | All languages        | Health bloggers                | Financial                                          | Volunteer donation, foundation, pharmaceutical manufacturer, device manufacturer, insurer, not-for-profit, webhost | None                   | <p>1. Industry sponsorship: Pharmaceutical manufacturers: <b>53.3%</b> (8/15)</p> <p>Diabetes device manufacturers: <b>60%</b> (9/15)</p> <p>Webhost Sponsorship: <b>13.3%</b> (2/15)</p> <p>2. Foundation sponsorship: <b>20%</b> (3/15)</p> <p>3. Voluntary donations: <b>26.7%</b> (4/15)</p> <p>4. No industry sponsorship: <b>20%</b> (3/15)</p> <p>5. Insurers: <b>20%</b> (3/15)</p> <p>6. Not-for-profit: <b>26.7%</b> (4/15)</p>                                                               |
| Tao 2017 [19]    | June 1 - August 1, 2016 | N/A | N/A | N/A | Cross-sectional: Survey of Twitter accounts of 634 hematologist-oncologists in the US | Prevalence of COI             | Funded by Laura and John Arnold Foundation                                                                                       | 1/4 reported receiving payments for contributions to Medscape | United States | United States | Twitter                 | Hematology-oncology | English <sup>1</sup> | Hematology-oncology physicians | Financial (general payments and research payments) | Industry                                                                                                           | Open Payments database | <p>▪ <b>79.5%</b> (504/634) of U.S.-based hematologist-oncologists were reported on the Open Payment Database for having at least 1 FCOI</p> <p>▪ Type of COI: General and research payments: 41% (262/634) of hematologist-oncologists<br/>Receiving general payment: 72.4% (459/634) of hematologist-oncologists<br/>Prevalence research payment: 48.4% (307/634) of hematologist-oncologists</p> <p>▪ General payment FCOI: Median \$1,644 (IQR, \$129-\$13,744)</p> <p>▪ Research payment FCOI:</p> |

1  
2  
3  
4  
5  
6  
7  
8  
9  
10  
11  
12  
13  
14  
15  
16  
17  
18  
19  
20  
21  
22  
23  
24  
25  
26  
27  
28  
29  
30  
31  
32  
33  
34  
35  
36  
37  
38  
39  
40  
41  
42  
43  
44  
45  
46  
47  
48  
49  
50  
51  
52  
53  
54  
55  
56  
57  
58  
59  
60

|                |               |                                                         |                |          |                                                                                                                            |                               |      |                                                                                                                                                       |             |              |         |                                                                       |         |                                                                                                                                                                     |               |                      |      |                                                                                                                                                                                                                                                                                                                                            |
|----------------|---------------|---------------------------------------------------------|----------------|----------|----------------------------------------------------------------------------------------------------------------------------|-------------------------------|------|-------------------------------------------------------------------------------------------------------------------------------------------------------|-------------|--------------|---------|-----------------------------------------------------------------------|---------|---------------------------------------------------------------------------------------------------------------------------------------------------------------------|---------------|----------------------|------|--------------------------------------------------------------------------------------------------------------------------------------------------------------------------------------------------------------------------------------------------------------------------------------------------------------------------------------------|
|                |               |                                                         |                |          |                                                                                                                            |                               |      |                                                                                                                                                       |             |              |         |                                                                       |         |                                                                                                                                                                     |               |                      |      | <p>Median \$11,064 (IQR, \$0-\$175164)</p> <p>General payments seemed consistent regardless of the extent of Twitter use, while research payments appeared greatest among those who use Twitter the least</p>                                                                                                                              |
| Toth 2019 [13] | November 2017 | N/A                                                     | N/A            | N/A      | Cross-sectional: Survey of 10 blog posts of nutritionists and registered dietitians in Ontario                             | Prevalence of 'potential' COI | None | 1/5 reported being the chair of the Professional Titles for Dietitians in Ontario Advocacy Group and 5/5 of authors are Ontario registered dietitians | Canada      | Canada       | Blogs   | Detoxification diets                                                  | English | Nutritionists and registered dietitians in Ontario                                                                                                                  | Not specified | Detox diets industry | None | <ul style="list-style-type: none"> <li>▪ <b>80%</b> (4/5) of nutritionist blog posts had a 'potential' COI (i.e., selling a product or service related to detox diets, including selling books, meal plan guides, and products such as juices)</li> <li>▪ <b>None</b> of registered dietitians blog posts had a 'potential' COI</li> </ul> |
| Vu 2021 [27]   | March 2021    | February 2008 (surgery)<br>November 2008 (radiotherapy) | September 2019 | 11 years | Cross-sectional: Survey of 80 YouTube videos on optimal treatment of prostate cancer: surgical therapy versus radiotherapy | Frequency of reporting of COI | None | None                                                                                                                                                  | Switzerland | Not reported | YouTube | Urology oncology: surgical therapy or radiotherapy of prostate cancer | English | Physicians, clinic, hospital or university<br><br>Others: patients, societies (foundations, governmental institutions, academic journals), industry, and news media | Not specified | Not specified        | None | <ul style="list-style-type: none"> <li>▪ <b>10%</b> (surgery) and <b>5%</b> (radiotherapy) of the providers included a disclosure of their conflicts of interest</li> <li>▪ Commercial bias: 15% (surgery videos) and 23% (radiotherapy videos) of the videos contained commercial bias</li> </ul>                                         |

1  
2  
3  
4  
5  
6  
7  
8  
9  
10  
11  
12  
13  
14  
15  
16  
17  
18  
19  
20  
21  
22  
23  
24  
25  
26  
27  
28  
29  
30  
31  
32  
33  
34  
35  
36  
37  
38  
39  
40  
41  
42  
43  
44  
45  
46  
47  
48  
49  
50  
51  
52  
53  
54  
55  
56  
57  
58  
59  
60

|                   |            |          |            |     |                                                                                                                                                                                                                                                     |                   |      |                                                                                                                                                                                                 |               |               |         |                  |         |                                  |           |          |                        |                                                                                                                                                                                                                                                                                                                                                                                                                  |
|-------------------|------------|----------|------------|-----|-----------------------------------------------------------------------------------------------------------------------------------------------------------------------------------------------------------------------------------------------------|-------------------|------|-------------------------------------------------------------------------------------------------------------------------------------------------------------------------------------------------|---------------|---------------|---------|------------------|---------|----------------------------------|-----------|----------|------------------------|------------------------------------------------------------------------------------------------------------------------------------------------------------------------------------------------------------------------------------------------------------------------------------------------------------------------------------------------------------------------------------------------------------------|
| Walradt 2021 [20] | April 2020 | No limit | April 2020 | N/A | Cross-sectional: Survey of 956 tweets by gastroenterologists and surgeons, sharing gastrointestinal (GI) endoscopy videos/images. Selected after identifying those followed by at least 1 major US gastroenterology society and had > 500 followers | Prevalence of COI | None | Potential competing interests: Dr. Berzin is a consultant for Wision AI, Boston Scientific, and Medtronic. All other authors disclosed no financial relationships relevant to this publication. | United States | United States | Twitter | Gastroenterology | English | Gastroenterologists and surgeons | Financial | Industry | Open Payments database | <ul style="list-style-type: none"> <li>▪ <b>37%</b> (7/19) of tweets that mentioned the name of a medical device were posted by a U.S physician who had received a payment (according to OPD) from the manufacturer of the device mentioned.</li> <li>▪ <b>None</b> of the physicians who had received a payment from the manufacturer of the device mentioned disclosed any financial relationships.</li> </ul> |
|-------------------|------------|----------|------------|-----|-----------------------------------------------------------------------------------------------------------------------------------------------------------------------------------------------------------------------------------------------------|-------------------|------|-------------------------------------------------------------------------------------------------------------------------------------------------------------------------------------------------|---------------|---------------|---------|------------------|---------|----------------------------------|-----------|----------|------------------------|------------------------------------------------------------------------------------------------------------------------------------------------------------------------------------------------------------------------------------------------------------------------------------------------------------------------------------------------------------------------------------------------------------------|

<sup>1</sup>Language was assumed based on the country of the individuals posting

#### ABBREVIATIONS:

COI: conflict of interest

FCOI: financial conflict of interest

OPD: Open Payment Database

FOAMed: Free Open Access Medical Education

N/A: Not available



Supplementary file 6: Appraisal of the 17 included studies using Mixed Methods Appraisal Tool.

### Mixed Methods Appraisal Tool (MMAT)

| First author   | Year | SCREENING QUESTIONS                     |                                                                    | 4. QUANTITATIVE DESCRIPTIVE STUDIES                                      |                                                             |                                        |                                           |                                                                               |
|----------------|------|-----------------------------------------|--------------------------------------------------------------------|--------------------------------------------------------------------------|-------------------------------------------------------------|----------------------------------------|-------------------------------------------|-------------------------------------------------------------------------------|
|                |      | S1. Are there clear research questions? | S2. Do the collected data allow to address the research questions? | 4.1. Is the sampling strategy relevant to address the research question? | 4.2. Is the sample representative of the target population? | 4.3. Are the measurements appropriate? | 4.4. Is the risk of nonresponse bias low? | 4.5. Is the statistical analysis appropriate to answer the research question? |
| Betschart [22] | 2020 | Yes                                     | Yes                                                                | Yes                                                                      | Yes                                                         | No <sup>1</sup>                        | Yes                                       | Yes                                                                           |
| Chretien [30]  | 2009 | Yes                                     | Yes                                                                | Yes                                                                      | Yes                                                         | Yes                                    | Yes                                       | Yes                                                                           |
| Chretien [21]  | 2011 | Yes                                     | Yes                                                                | Yes                                                                      | Yes                                                         | Yes                                    | Yes                                       | Yes                                                                           |
| Greysen [10]   | 2012 | Yes                                     | Yes                                                                | Yes                                                                      | Yes                                                         | Yes                                    | Yes                                       | Yes                                                                           |
| Hessari [31]   | 2019 | Yes                                     | Yes                                                                | Yes                                                                      | Yes                                                         | Yes                                    | Yes                                       | Yes                                                                           |
| Kaestner [29]  | 2017 | Yes                                     | Yes                                                                | Yes                                                                      | Yes                                                         | No <sup>2</sup>                        | Yes                                       | Yes                                                                           |
| Lagu [23]      | 2008 | Yes                                     | Yes                                                                | Yes                                                                      | Yes                                                         | No <sup>1</sup>                        | Yes                                       | Yes                                                                           |
| Miller [12]    | 2011 | Yes                                     | Yes                                                                | Yes                                                                      | Yes                                                         | No <sup>1</sup>                        | Yes                                       | Yes                                                                           |
| Niforatos [18] | 2019 | Yes                                     | Yes                                                                | Yes                                                                      | Yes                                                         | No <sup>2</sup>                        | Yes                                       | Yes                                                                           |
| Nishizaki [24] | 2021 | Yes                                     | Yes                                                                | Yes                                                                      | Yes                                                         | No <sup>1</sup>                        | Yes                                       | Yes                                                                           |
| Pratsinis [25] | 2021 | Yes                                     | Yes                                                                | Yes                                                                      | Yes                                                         | No <sup>1</sup>                        | Yes                                       | Yes                                                                           |
| Pratsinis [26] | 2021 | Yes                                     | Yes                                                                | Yes                                                                      | Yes                                                         | No <sup>1</sup>                        | Yes                                       | Yes                                                                           |
| Shrank [28]    | 2011 | Yes                                     | Yes                                                                | Yes                                                                      | Yes                                                         | No <sup>1</sup>                        | Yes                                       | Yes                                                                           |
| Tao [19]       | 2017 | Yes                                     | Yes                                                                | Yes                                                                      | Yes                                                         | Yes                                    | Yes                                       | Yes                                                                           |
| Toth [13]      | 2019 | Yes                                     | Yes                                                                | Yes                                                                      | Yes                                                         | Yes                                    | Yes                                       | Yes                                                                           |
| Vu [27]        | 2021 | Yes                                     | Yes                                                                | Yes                                                                      | Yes                                                         | No <sup>1</sup>                        | Yes                                       | Yes                                                                           |
| Walradt [20]   | 2021 | Yes                                     | Yes                                                                | Yes                                                                      | Yes                                                         | No <sup>2</sup>                        | Yes                                       | Yes                                                                           |

<sup>1</sup> It was not clear from any of the studies whether the percentage referred to the number of COI statements (whether reporting the existing or not of COI) or to the number of statements reporting a COI.

<sup>2</sup> It was not clear from any of the studies whether the proportion referred to those who reported no COI or those who had no COI statement.





## PRISMA 2020 for Abstracts Checklist

| Section and Topic       | Item # | Checklist item                                                                                                                                                                                                                                                                                        | Reported (Yes/No) |
|-------------------------|--------|-------------------------------------------------------------------------------------------------------------------------------------------------------------------------------------------------------------------------------------------------------------------------------------------------------|-------------------|
| <b>TITLE</b>            |        |                                                                                                                                                                                                                                                                                                       |                   |
| Title                   | 1      | Identify the report as a systematic review.                                                                                                                                                                                                                                                           | Yes               |
| <b>BACKGROUND</b>       |        |                                                                                                                                                                                                                                                                                                       |                   |
| Objectives              | 2      | Provide an explicit statement of the main objective(s) or question(s) the review addresses.                                                                                                                                                                                                           | Yes               |
| <b>METHODS</b>          |        |                                                                                                                                                                                                                                                                                                       |                   |
| Eligibility criteria    | 3      | Specify the inclusion and exclusion criteria for the review.                                                                                                                                                                                                                                          | Yes               |
| Information sources     | 4      | Specify the information sources (e.g. databases, registers) used to identify studies and the date when each was last searched.                                                                                                                                                                        | Yes               |
| Risk of bias            | 5      | Specify the methods used to assess risk of bias in the included studies.                                                                                                                                                                                                                              | Yes               |
| Synthesis of results    | 6      | Specify the methods used to present and synthesise results.                                                                                                                                                                                                                                           | Yes               |
| <b>RESULTS</b>          |        |                                                                                                                                                                                                                                                                                                       |                   |
| Included studies        | 7      | Give the total number of included studies and participants and summarise relevant characteristics of studies.                                                                                                                                                                                         | Yes               |
| Synthesis of results    | 8      | Present results for main outcomes, preferably indicating the number of included studies and participants for each. If meta-analysis was done, report the summary estimate and confidence/credible interval. If comparing groups, indicate the direction of the effect (i.e. which group is favoured). | Yes               |
| <b>DISCUSSION</b>       |        |                                                                                                                                                                                                                                                                                                       |                   |
| Limitations of evidence | 9      | Provide a brief summary of the limitations of the evidence included in the review (e.g. study risk of bias, inconsistency and imprecision).                                                                                                                                                           | Yes               |
| Interpretation          | 10     | Provide a general interpretation of the results and important implications.                                                                                                                                                                                                                           | Yes               |
| <b>OTHER</b>            |        |                                                                                                                                                                                                                                                                                                       |                   |
| Funding                 | 11     | Specify the primary source of funding for the review.                                                                                                                                                                                                                                                 | Yes               |
| Registration            | 12     | Provide the register name and registration number.                                                                                                                                                                                                                                                    | Yes               |

From: Page MJ, McKenzie JE, Bossuyt PM, Boutron I, Hoffmann TC, Mulrow CD, et al. The PRISMA 2020 statement: an updated guideline for reporting systematic reviews. *BMJ* 2021;372:n71. doi: 10.1136/bmj.n71

For more information, visit: <http://www.prisma-statement.org/>

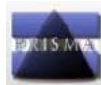

## PRISMA 2020 Checklist

1  
2  
3  
4  
5  
6  
7  
8  
9  
10  
11  
12  
13  
14  
15  
16  
17  
18  
19  
20  
21  
22  
23  
24  
25  
26  
27  
28  
29  
30  
31  
32  
33  
34  
35  
36  
37  
38  
39  
40  
41  
42  
43  
44  
45  
46  
47

| Section and Topic             | Item # | Checklist item                                                                                                                                                                                                                                                                                       | Location where item is reported                 |
|-------------------------------|--------|------------------------------------------------------------------------------------------------------------------------------------------------------------------------------------------------------------------------------------------------------------------------------------------------------|-------------------------------------------------|
| <b>TITLE</b>                  |        |                                                                                                                                                                                                                                                                                                      |                                                 |
| Title                         | 1      | Identify the report as a systematic review.                                                                                                                                                                                                                                                          | Page 1                                          |
| <b>ABSTRACT</b>               |        |                                                                                                                                                                                                                                                                                                      |                                                 |
| Abstract                      | 2      | See the PRISMA 2020 for Abstracts checklist.                                                                                                                                                                                                                                                         | Check PRISMA for abstracts checklist            |
| <b>INTRODUCTION</b>           |        |                                                                                                                                                                                                                                                                                                      |                                                 |
| Rationale                     | 3      | Describe the rationale for the review in the context of existing knowledge.                                                                                                                                                                                                                          | Page 4                                          |
| Objectives                    | 4      | Provide an explicit statement of the objective(s) or question(s) the review addresses.                                                                                                                                                                                                               | Page 4                                          |
| <b>METHODS</b>                |        |                                                                                                                                                                                                                                                                                                      |                                                 |
| Eligibility criteria          | 5      | Specify the inclusion and exclusion criteria for the review and how studies were grouped for the syntheses.                                                                                                                                                                                          | Pages 5-6                                       |
| Information sources           | 6      | Specify all databases, registers, websites, organisations, reference lists and other sources searched or consulted to identify studies. Specify the date when each source was last searched or consulted.                                                                                            | Page 6                                          |
| Search strategy               | 7      | Present the full search strategies for all databases, registers and websites, including any filters and limits used.                                                                                                                                                                                 | <a href="#">Appendix-B Supplementary file 2</a> |
| Selection process             | 8      | Specify the methods used to decide whether a study met the inclusion criteria of the review, including how many reviewers screened each record and each report retrieved, whether they worked independently, and if applicable, details of automation tools used in the process.                     | Page 6                                          |
| Data collection process       | 9      | Specify the methods used to collect data from reports, including how many reviewers collected data from each report, whether they worked independently, any processes for obtaining or confirming data from study investigators, and if applicable, details of automation tools used in the process. | Pages 6-7                                       |
| Data items                    | 10a    | List and define all outcomes for which data were sought. Specify whether all results that were compatible with each outcome domain in each study were sought (e.g. for all measures, time points, analyses), and if not, the methods used to decide which results to collect.                        | Pages 5- <del>7</del> <a href="#">and 7</a>     |
|                               | 10b    | List and define all other variables for which data were sought (e.g. participant and intervention characteristics, funding sources). Describe any assumptions made about any missing or unclear information.                                                                                         | Pages 6-7                                       |
| Study risk of bias assessment | 11     | Specify the methods used to assess risk of bias in the included studies, including details of the tool(s) used, how many reviewers assessed each study and whether they worked independently, and if applicable, details of automation tools used in the process.                                    | Page 7                                          |
| Effect measures               | 12     | Specify for each outcome the effect measure(s) (e.g. risk ratio, mean difference) used in the synthesis or presentation of results.                                                                                                                                                                  | Page 7                                          |
| Synthesis methods             | 13a    | Describe the processes used to decide which studies were eligible for each synthesis (e.g. tabulating the study intervention characteristics and comparing against the planned groups for each synthesis (item #5)).                                                                                 | Page 7                                          |
|                               | 13b    | Describe any methods required to prepare the data for presentation or synthesis, such as handling of missing summary statistics, or data conversions.                                                                                                                                                | Not applicable                                  |
|                               | 13c    | Describe any methods used to tabulate or visually display results of individual studies and syntheses.                                                                                                                                                                                               | Pages 6-7                                       |
|                               | 13d    | Describe any methods used to synthesize results and provide a rationale for the choice(s). If meta-analysis was performed, describe the model(s), method(s) to identify the presence and extent of statistical heterogeneity, and software package(s) used.                                          | Pages 6-7                                       |
|                               | 13e    | Describe any methods used to explore possible causes of heterogeneity among study results (e.g. subgroup analysis, meta-regression).                                                                                                                                                                 | Not applicable                                  |
|                               | 13f    | Describe any sensitivity analyses conducted to assess robustness of the synthesized results.                                                                                                                                                                                                         | Not applicable                                  |

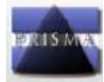

## PRISMA 2020 Checklist

| Section and Topic             | Item # | Checklist item                                                                                                                                                                                                                                                                       | Location where item is reported                 |
|-------------------------------|--------|--------------------------------------------------------------------------------------------------------------------------------------------------------------------------------------------------------------------------------------------------------------------------------------|-------------------------------------------------|
| Reporting bias assessment     | 14     | Describe any methods used to assess risk of bias due to missing results in a synthesis (arising from reporting biases).                                                                                                                                                              | Not applicable                                  |
| Certainty assessment          | 15     | Describe any methods used to assess certainty (or confidence) in the body of evidence for an outcome.                                                                                                                                                                                | Not applicable                                  |
| <b>RESULTS</b>                |        |                                                                                                                                                                                                                                                                                      |                                                 |
| Study selection               | 16a    | Describe the results of the search and selection process, from the number of records identified in the search to the number of studies included in the review, ideally using a flow diagram.                                                                                         | Page 8                                          |
|                               | 16b    | Cite studies that might appear to meet the inclusion criteria, but which were excluded, and explain why they were excluded.                                                                                                                                                          | Supplementary file <a href="#">46</a>           |
| Study characteristics         | 17     | Cite each included study and present its characteristics.                                                                                                                                                                                                                            | <a href="#">Appendix- CSupplementary File 5</a> |
| Risk of bias in studies       | 18     | Present assessments of risk of bias for each included study.                                                                                                                                                                                                                         | <a href="#">Appendix- DSupplementary File 6</a> |
| Results of individual studies | 19     | For all outcomes, present, for each study: (a) summary statistics for each group (where appropriate) and (b) an effect estimate and its precision (e.g. confidence/credible interval), ideally using structured tables or plots.                                                     | Pages 8-12                                      |
| Results of syntheses          | 20a    | For each synthesis, briefly summarise the characteristics and risk of bias among contributing studies.                                                                                                                                                                               | Pages 8-12                                      |
|                               | 20b    | Present results of all statistical syntheses conducted. If meta-analysis was done, present for each the summary estimate and its precision (e.g. confidence/credible interval) and measures of statistical heterogeneity. If comparing groups, describe the direction of the effect. | Pages 8-12                                      |
|                               | 20c    | Present results of all investigations of possible causes of heterogeneity among study results.                                                                                                                                                                                       | Not applicable                                  |
|                               | 20d    | Present results of all sensitivity analyses conducted to assess the robustness of the synthesized results.                                                                                                                                                                           | Not applicable                                  |
| Reporting biases              | 21     | Present assessments of risk of bias due to missing results (arising from reporting biases) for each synthesis assessed.                                                                                                                                                              | Not applicable                                  |
| Certainty of evidence         | 22     | Present assessments of certainty (or confidence) in the body of evidence for each outcome assessed.                                                                                                                                                                                  | Not applicable                                  |
| <b>DISCUSSION</b>             |        |                                                                                                                                                                                                                                                                                      |                                                 |
| Discussion                    | 23a    | Provide a general interpretation of the results in the context of other evidence.                                                                                                                                                                                                    | Page <a href="#">153</a>                        |
|                               | 23b    | Discuss any limitations of the evidence included in the review.                                                                                                                                                                                                                      | Pages <a href="#">153-14</a>                    |
|                               | 23c    | Discuss any limitations of the review processes used.                                                                                                                                                                                                                                | Pages <a href="#">1513-14</a>                   |
|                               | 23d    | Discuss implications of the results for practice, policy, and future research.                                                                                                                                                                                                       | Pages <a href="#">16-17-14</a>                  |
| <b>OTHER INFORMATION</b>      |        |                                                                                                                                                                                                                                                                                      |                                                 |
| Registration and protocol     | 24a    | Provide registration information for the review, including register name and registration number, or state that the review was not registered.                                                                                                                                       | Page 5                                          |
|                               | 24b    | Indicate where the review protocol can be accessed, or state that a protocol was not prepared.                                                                                                                                                                                       | Page 5                                          |
|                               | 24c    | Describe and explain any amendments to information provided at registration or in the protocol.                                                                                                                                                                                      | Page 5                                          |
| Support                       | 25     | Describe sources of financial or non-financial support for the review, and the role of the funders or sponsors in the review.                                                                                                                                                        | Page <a href="#">185</a>                        |
| Competing                     | 26     | Declare any competing interests of review authors. <a href="http://bmjopen.bmj.com/site/about/guidelines.xhtml">http://bmjopen.bmj.com/site/about/guidelines.xhtml</a>                                                                                                               | Page <a href="#">185</a>                        |

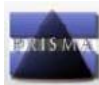

## PRISMA 2020 Checklist

1  
2  
3  
4  
5  
6  
7  
8  
9  
10  
11  
12  
13  
14  
15  
16  
17  
18  
19  
20  
21  
22  
23  
24  
25  
26  
27  
28  
29  
30  
31  
32  
33  
34  
35  
36  
37  
38  
39  
40  
41  
42  
43  
44  
45  
46  
47

| Section and Topic                              | Item # | Checklist item                                                                                                                                                                                                                             | Location where item is reported |
|------------------------------------------------|--------|--------------------------------------------------------------------------------------------------------------------------------------------------------------------------------------------------------------------------------------------|---------------------------------|
| interests                                      |        |                                                                                                                                                                                                                                            |                                 |
| Availability of data, code and other materials | 27     | Report which of the following are publicly available and where they can be found: template data collection forms; data extracted from included studies; data used for all analyses; analytic code; any other materials used in the review. | Page 185                        |

From: Page MJ, McKenzie JE, Bossuyt PM, Boutron I, Hoffmann TC, Mulrow CD, et al. The PRISMA 2020 statement: an updated guideline for reporting systematic reviews. *BMJ* 2021;372:n71. doi: 10.1136/bmj.n71

For more information, visit: <http://www.prisma-statement.org/>

For peer review only
