# Supplementary material for: Conflict of interest and funding in health communication on social media: a systematic review
Source: PubMed Central journal article supplement — BMJ Open. 2023 Aug 14;13(8):e072258. doi: 10.1136/bmjopen-2023-072258 (PMC10432670; doi:10.1136/bmjopen-2023-072258), 2023-08-14
Supplement: bmjopen-2023-072258supp002.pdf [file bmjopen-2023-072258supp002.pdf]

**Supplementary file 2:** Search strategies used in Medline(OVID), Embase and Google

Scholar

**Medline Search Strategy**

Database: Ovid MEDLINE(R) and Epub Ahead of Print, In-Process & Other Non-Indexed Citations and Daily <1946 to February 15, 2019>

Search Strategy:

- 
- 1 "Conflict of Interest"/ (9255)
  - 2 ((competing or conflict\*) adj3 (interest? or influence? or relationship?)).mp. (18489)
  - 3 financial support/ or research support as topic/ (25591)
  - 4 (((financ\* or monetary or industr\* or pharmaceutical\*) adj3 (fund\* or pay\* or paid or support or contributi\* or compensat\* or sponsor\* or backing or (kick adj back\*) or incentive? or re?imburse\* or subsidi\* or award\* or endow\* or tie? or link\* or associat\* or affiliation? or relation\* or grant\*)) or disclos\*).mp. (120953)
  - 5 Disclosure/ (12719)
  - 6 Gift Giving/ (1521)
  - 7 ((financ\* or gift? or gift-giving) adj3 (disclos\* or report\* or declar\* or reveal\* or receiv\* or giv\* or gave or accept\* or award\* or admit\*).mp. [mp=title, abstract, original title, name of substance word, subject heading word, floating sub-heading word, keyword heading word, organism supplementary concept word, protocol supplementary concept word, rare disease supplementary concept word, unique identifier, synonyms] (7487)
  - 8 or/1-7 (158539)
  - 9 exp Mass Media/ (44039)
  - 10 (mass adj2 (media? or medium or communication?)).mp. (16758)
  - 11 (columnist? or reporter? or correspondent? or commentator? or reviewer?).mp. (145928)
  - 12 Social Media/ (5474)
  - 13 (((social or digital) adj2 (medium or media\* or network\* or net-work\* or bookmark\* or book-mark\* or application? or debate\* or channel\* or communication? or collaborat\*)) or (institution\* adj reposito\*).mp. (35361)
  - 14 Blogging/ (903)
  - 15 (blog\* or microblog\* or micro-blog\* or weblog\*).mp. (2308)
  - 16 (tout or wordpress or yammer or citeulike or zotero or evernote or delicious or Digg or picasa or youtube or Vimeo or reddit or snapchat or mendeley).mp. (3525)
  - 17 exp Social Networking/ (2487)
  - 18 (facebook or twitter or tweet\* or LinkedIn or pinterest).mp. (5334)
  - 19 ((Google adj plus) or google?+).mp. (15664)
  - 20 (Tumblr or Instagram or myspace or researchgate or academia or figshare or mendeley).mp. (7153)
  - 21 Webcasts as Topic/ (301)
  - 22 (podcast\* or pod-cast\* or webcast\* or web-cast\*).mp. (1687)
  - 23 (rss adj2 feed\*).mp. (49)
  - 24 (weibo or flickr).mp. (171)
  - 25 ((virtual or video\* or content? or project? or audio or digital or online or forum? or web) adj2 (world? or reality or place? or communit\* or communicat\* or collaborat\* or shar\*).mp. (23762)
  - 26 (web adj2 application\*).mp. (2856)
  - 27 ((user adj generated) or usergenerated).mp. (359)

28 (wikipedia or wiki\* or "web 2.0").mp. (1786)  
29 ((knowledge or internet or (electronic adj mail) or email or e-mail or health or listserv\*)  
adj2 (share\* or communicat\* or sharing? or collaborat\*).mp. (15600)  
30 or/9-29 (296669)  
31 8 and 30 (4486)  
32 limit 31 to yr="2005 -Current" (3436)

\*\*\*\*\*

### EMBASE Search Strategy

#33 #32 AND (2005:py OR 2006:py OR 2007:py OR 2008:py OR 2010:py OR 2011:py OR 2012:py OR 2013:py OR 2014:py OR 2015:py OR 2016:py OR 2017:py OR 2018:py OR 2019:py OR 2020:py OR 2021:py OR 2022:py) **5551**

#32 #31

#31 #9 AND #30 **6193**

#30 #10 OR #11 OR #12 OR #13 OR #14 OR #15 OR #16 OR #17 OR #18 OR #19 OR #20 OR #21 OR #22 OR #23 OR #24 OR #25 OR #26 OR #27 OR #28 OR #29 **334472**

#29 (knowledge OR internet OR electronic) NEAR/2 (mail OR email OR 'e mail' OR health OR listserv\*) NEAR/2 (share\* OR communicat\* OR sharing\* OR collaborat\*) **2485**

#28 wikipedia OR wiki\* OR 'web 2.0' **2900**

#27 (user NEXT/1 generated) OR usergenerated **407**

#26 web NEAR/2 application\* **3670**

#25 (virtual OR video\* OR content\* OR project\* OR audio OR digital OR online OR forum\* OR web) NEAR/2 (world\* OR reality OR place\* OR communit\* OR communicat\* OR collaborat\* OR shar\*) **44943**

#24 weibo OR flickr **1657**

#23 rss NEAR/2 feed\* **72**

#22 podcast\* OR 'pod cast\*' OR webcast\* OR 'web cast\*' **1687**

#21 'webcast'/de **310**

#20 tumblr OR instagram OR myspace OR researchgate OR academia OR figshare OR Mendeley **41870**

#19 (google NEXT/1 plus) OR google?+ **63**

#18 facebook OR twitter OR tweet\* OR linkedin OR pinterest **7561**

#17 'social network'/exp **13447**

#16 tout OR wordpress OR yammer OR citeulike OR zotero OR evernote OR delicious OR digg OR picasa OR youtube OR vimeo OR reddit OR snapchat **4608**

#15 blog\* OR microblog\* OR 'micro blog\*' OR weblog\* **3710**

#14 'blogging'/de **260**

#13 ((social OR digital) NEAR/2 (medium OR media\* OR network\* OR 'net work\*' OR bookmark\* OR 'book mark\*' OR application? OR debate\* OR channel\* OR communication? OR collaborat\*)) OR (institution\* NEAR/2 repositor\*) **44828**

#12 'social media'/de **13939**

#11 columnist\* OR reporter\* OR correspondent\* OR commentator\* OR reviewer\* **172962**  
#10 'mass medium'/exp **17396**  
#9 #1 OR #2 OR #3 OR #4 OR #5 OR #6 OR #7 OR #8 **224956**  
#8 (financ\* OR gift\* OR 'gift giving') NEAR/3 (disclos\* OR report\* OR declar\* OR  
reveal\* OR receiv\* OR giv\* OR gave OR accept\* OR award\* OR admit\*) **10745**  
#7 'gift giving'/de **1086**  
#6 disclos\* **89957**  
#5 (financ\* OR monetary OR industr\* OR pharmaceutical\*) NEAR/3 (fund\* OR pay\* OR  
paid OR support OR contributi\* OR compensat\* OR sponsor\* OR backing OR 'kick back'  
OR incentive\* OR re\*imburse\* OR subsidi\* OR award\* OR endow\* OR disclos\* OR tie  
OR ties OR link\* OR associat\* OR affiliat\* OR relation\* OR grant\*) **80180**  
#4 research NEAR/1 support **6650**  
#3 'funding'/de **37321**  
#2 (competing OR conlict\*) NEAR/3 (interest\* OR influence\* OR relationship\*) **22710**  
#1 'conflict of interest'/exp **11111**

.....

**Google Scholar**

("Conflict of Interest" OR "Conflict of Interests" OR "Competing Interest" OR "Competing Interests" OR "financial support" OR "financial declaration") AND (Facebook OR Instagram OR twitter OR tweet OR Pinterest OR LinkedIn OR fig share OR Mendeley OR Snapchat OR "social media")

Picked: 200 articles
