# Supplementary material for: Conflict of interest and funding in health communication on social media: a systematic review
Source: PubMed Central journal article supplement — BMJ Open. 2023 Aug 14;13(8):e072258. doi: 10.1136/bmjopen-2023-072258 (PMC10432670; doi:10.1136/bmjopen-2023-072258), 2023-08-14
Supplement: bmjopen-2023-072258supp003.pdf [file bmjopen-2023-072258supp003.pdf]

## Supplementary file 3: PRISMA 2020 flow diagram for systematic reviews

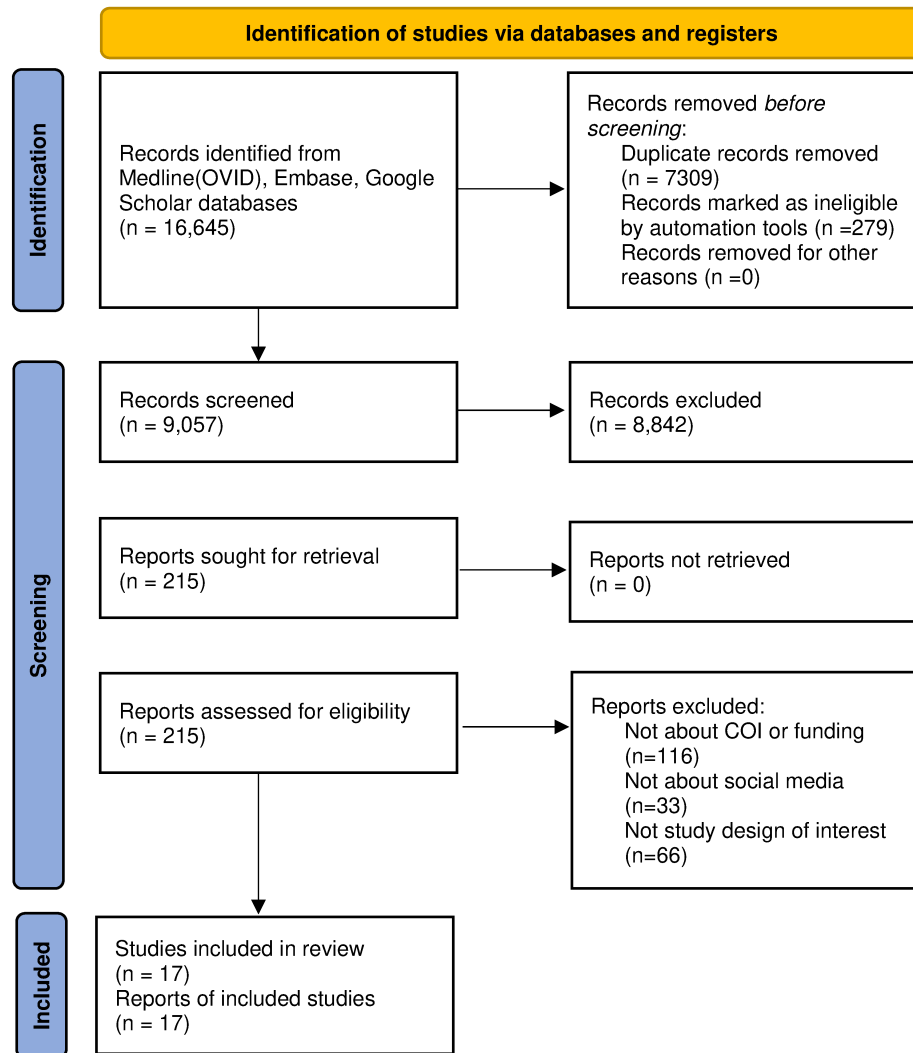

From: Page MJ, McKenzie JE, Bossuyt PM, Boutron I, Hoffmann TC, Mulrow CD, et al. The PRISMA 2020 statement: an updated guideline for reporting systematic reviews. *BMJ* 2021;372:n71. doi: 10.1136/bmj.n71
