# Supplementary material for: Conflict of interest and funding in health communication on social media: a systematic review
Source: PubMed Central journal article supplement — BMJ Open. 2023 Aug 14;13(8):e072258. doi: 10.1136/bmjopen-2023-072258 (PMC10432670; doi:10.1136/bmjopen-2023-072258), 2023-08-14
Supplement: bmjopen-2023-072258supp004.pdf [file bmjopen-2023-072258supp004.pdf]

**Supplementary File 4:** Excluded studies in full-text screening with their corresponding reason of exclusion.

| <b>Author/Journal, year</b> | <b>Reason of exclusion</b>   |
|-----------------------------|------------------------------|
| Aase 2010 [1]               | Not study design of interest |
| Abdel-Wahab 2019 [2]        | Not about COI                |
| Aboujaoude 2019 [3]         | Not about COI                |
| Addiction 2011 [4]          | Not about social media       |
| Ahc 2019 [5]                | Not about social media       |
| AIDS alert 2011 [6]         | Not about social media       |
| Aiken 2012 [7]              | Not about COI                |
| Al-Balushi 2020 [8]         | Not study design of interest |
| Alshaikh 2019 [9]           | Not about social media       |
| Anderson 2010 [10]          | Not about COI                |
| Anderson 2010 [10]          | Not study design of interest |
| Anderson 2013 [11]          | Not about COI                |
| Apperson 2019 [12]          | Not about COI                |
| Au 2021 [13]                | Not study design of interest |
| Azizi 2013 [14]             | Not about COI                |
| Back letter 2008 [15]       | Not about social media       |
| Back letter 2008 [16]       | Not about social media       |
| Baier 2019 [17]             | Not about COI                |
| Bamat 2018 [18]             | Not study design of interest |
| Barber 2020 [19]            | Not about social media       |
| Barreda 2015 [20]           | Not about COI                |
| Baxter 2009 [21]            | Not study design of interest |
| Bayne 2017 [22]             | Not about COI                |
| Bechini 2021 [23]           | Not about social media       |
| Becker 2015 [24]            | Not about social media       |
| Bertholf 2021 [25]          | Not study design of interest |
| Bhat 2019 [26]              | Not study design of interest |
| Bibault 2017 [27]           | Not study design of interest |
| Blastl 2020 [28]            | Not study design of interest |
| Bosslet 2011 [29]           | Not about COI                |
| Braccia 2009 [30]           | Not about COI                |
| Braillon 2018 [31]          | Not study design of interest |
| Braunstein 2012 [32]        | Not about COI                |
| Bredenoord 2017 [33]        | Not about COI                |
| Bukhari 2021 [34]           | Not about social media       |
| Bullock 2014 [35]           | Not about COI                |
| Cain 2010 [36]              | Not about COI                |
| Capel 2019 [37]             | Not about COI                |
| Carson 2018 [38]            | Not about COI                |
| Casigliani 2020 [39]        | Not study design of interest |
| Casswell 2018 [40]          | Not about social media       |

|                            |                              |
|----------------------------|------------------------------|
| Chan 2012 [41]             | Not study design of interest |
| Chretien 2013 [42]         | Not study design of interest |
| Coutts 2018 [43]           | Not about social media       |
| Cunningham 2014 [44]       | Not about COI                |
| Dainton 2009 [45]          | Not about COI                |
| De Ambrogi 2019 [46]       | Not study design of interest |
| DeCamp 2012 [47]           | Not study design of interest |
| DeCamp 2013 [48]           | Not study design of interest |
| DeCamp 2013 [49]           | Not study design of interest |
| DeChello 2012 [50]         | Not study design of interest |
| Denecke 2014 [51]          | Not study design of interest |
| Dolgin 2019 [52]           | Not about social media       |
| Douglas 2020 [53]          | Not study design of interest |
| Drone 2015 [54]            | Not about COI                |
| Dugdale 2021 [55]          | Not study design of interest |
| ED management 2005 [56]    | Not about COI                |
| Englund 2012 [57]          | Not about COI                |
| Essary 2011 [58]           | Not about COI                |
| Failli 2021 [59]           | Not about social media       |
| Faloon 2006 [60]           | Not about COI                |
| Farrelly 2014 [61]         | Not about COI                |
| Fattore 2019 [62]          | Not about COI                |
| Fontanarosa 2019 [63]      | Not about social media       |
| For the Record 2011 [64]   | Not study design of interest |
| For the record 2013 [65]   | Not study design of interest |
| Frankish 2012 [66]         | Not about COI                |
| Galbraith 2014 [67]        | Not about COI                |
| Gifford 2021 [68]          | Not study design of interest |
| Gilligan 2019 [69]         | Not study design of interest |
| Gordon 2010 [70]           | Not about COI                |
| Gottlieb 2020 [71]         | Not study design of interest |
| Grace 2021 [72]            | Not about COI                |
| Grummer-Strawn 2019 [73]   | Not about social media       |
| Guo 2020 [74]              | Not study design of interest |
| Gupta 2020 [75]            | Not study design of interest |
| Haddas 2021 [76]           | Not study design of interest |
| Haldar 2010 [77]           | Not about COI                |
| Hampton 2005 [78]          | Not about social media       |
| Hanley 2012 [79]           | Not about COI                |
| Harris 2012 [80]           | Not about COI                |
| Henderson 2014 [81]        | Not about COI                |
| Henderson 2020 [82]        | Not about COI                |
| Henry 2014 [83]            | Not about COI                |
| Hernandez-Aguado 2020 [84] | Not about COI                |

|                                               |                              |
|-----------------------------------------------|------------------------------|
| Hessari 2019 [85]                             | Not study design of interest |
| Hetzler 2020 [86]                             | Not about COI                |
| Holden 2017 [87]                              | Not about COI                |
| Huby 2016 [88]                                | Not about COI                |
| Hwang 2016 [89]                               | Not health field             |
| Hwong 2014 [90]                               | Not study design of interest |
| Islam 2019 [91]                               | Not study design of interest |
| Jiang 2017 [92]                               | Not about COI                |
| Jones 2021 [93]                               | Not about COI                |
| Joshi 2020 [94]                               | Not study design of interest |
| Journal of Instructional Psychology 2012 [95] | Not about COI                |
| Journal of Korean medical science 2015 [96]   | Not about COI                |
| Katz 2014 [97]                                | Not about COI                |
| Kh 2009 [98]                                  | Not about social media       |
| Kirschner 2013 [99]                           | Not study design of interest |
| Kleebauer 2014 [100]                          | Not about COI                |
| Knoepfler 2016 [101]                          | Not about COI                |
| Knopf 2018 [102]                              | Not about COI                |
| Korman 2021 [103]                             | Not about social media       |
| Kullgren 2014 [104]                           | Not about COI                |
| Kunze 2020 [105]                              | Not about COI                |
| Lachman 2013 [106]                            | Not about COI                |
| Lackner 2012 [107]                            | Not about social media       |
| Lagu 2011 [108]                               | Not about COI                |
| Layng 2012 [109]                              | Not about COI                |
| Lazard 2020 [110]                             | Not about COI                |
| Lee 2016 [111]                                | Not health field             |
| Lee 2020 [112]                                | Not about COI                |
| Lerner 2013 [113]                             | Not about COI                |
| Lin 2016 [114]                                | Not about COI                |
| Lusis 2009 [115]                              | Not about COI                |
| Macauley 2021 [116]                           | Not study design of interest |
| MacWilliam 2006 [117]                         | Not study design of interest |
| Mansfield 2011 [118]                          | Not about COI                |
| Margaret 2019 [119]                           | Not about COI                |
| Mayes 2018 [120]                              | Not about social media       |
| McCarthy 2018 [121]                           | Not study design of interest |
| McComas 2008 [122]                            | Not about COI                |
| McCullough 2010 [123]                         | Not about COI                |
| Medical marketing 2016 [124]                  | Not study design of interest |
| Militello 2021 [125]                          | Not study design of interest |
| Milton 2014 [126]                             | Not about COI                |
| Milton 2016 [127]                             | Not about COI                |
| Milton 2018 [128]                             | Not about COI                |
| Minhas 2006 [129]                             | Not study design of interest |

|                                  |                              |
|----------------------------------|------------------------------|
| Modern Healthcare 2017 [130]     | Not about COI                |
| Moodley 2013 [131]               | Not about COI                |
| Moses 2014 [132]                 | Not about COI                |
| Moukarzel 2021 [133]             | Not study design of interest |
| Murakami 2019 [134]              | Not about COI                |
| Muzumdar 2021 [135]              | Not study design of interest |
| Naeem 2021 [136]                 | Not about COI                |
| Nau 2017 [137]                   | Not about COI                |
| Neuer 2019 [138]                 | Not about social media       |
| Neville 2015 [139]               | Not about COI                |
| Neville 2016 [140]               | Not about COI                |
| Nursing ethics 2015 [141]        | Not study design of interest |
| Nursing standard 2016 [142]      | Not study design of interest |
| Nursing times 2011 [143]         | Not study design of interest |
| O'Glasser 2020 [144]             | Not study design of interest |
| O'Hanlon 2011 [145]              | Not about COI                |
| O'Keeffe 2019 [146]              | Not study design of interest |
| O'Rourke 2015 [147]              | Not about COI                |
| Oncology 2012 [148]              | Not about COI                |
| Ong 2021 [149]                   | Not study design of interest |
| OR Manager 2009 [150]            | Not about COI                |
| Oransky 2006 [151]               | Not study design of interest |
| Ornstein 2011 [152]              | Not about social media       |
| Padeiro 2021 [153]               | Not about COI                |
| Pagoto 2019 [154]                | Not about COI                |
| Parasidis 2019 [155]             | Not about COI                |
| Paterson 2019 [156]              | Not study design of interest |
| Peltier 2012 [157]               | Not about social media       |
| Pelton 2012 [158]                | Not about COI                |
| Pierce 2019 [159]                | Not about COI                |
| Prasad 2018 [160]                | Not study design of interest |
| Prateek 2018 [161]               | Not about COI                |
| Ragan 2012 [162]                 | Not about COI                |
| Ranpariya 2020 [163]             | Not study design of interest |
| Ravn 2020 [164]                  | Not about COI                |
| Rechenberg 2013 [165]            | Not about social media       |
| Redick 2022 [166]                | Not about social media       |
| Research Practitioner 2011 [167] | Not about social media       |
| Roucka 2014 [168]                | Not about COI                |
| Roupret 2014 [169]               | Not about COI                |
| Samsa 2019 [170]                 | Not about social media       |
| Santillan-Doherty 2020 [171]     | Not about COI                |
| Santoro 2015 [172]               | Not about COI                |
| Santoro 2022 [173]               | Not study design of interest |
| Sartor 2019 [174]                | Not about social media       |

|                               |                              |
|-------------------------------|------------------------------|
| Scruth 2015 [175]             | Not about COI                |
| Sepey 2017 [176]              | Not about social media       |
| Sh 2019 [177]                 | Not about COI                |
| Sharma 2020 [178]             | Not about COI                |
| Shore 2011 [179]              | Not about COI                |
| Silva 2018 [180]              | Not about COI                |
| Sissung 2021 [181]            | Not study design of interest |
| Slagle 2011 [182]             | Not about social media       |
| Smyth 2005 [183]              | Not study design of interest |
| Snyder 2011 [184]             | Not about COI                |
| Studenic 2019 [185]           | Not about COI                |
| Swartz 2016 [186]             | Not about COI                |
| Tanchuco 2020 [187]           | Not about COI                |
| Technology 2021 [188]         | Not about COI                |
| Terrasse 2019 [189]           | Not study design of interest |
| The American nurse 2015 [190] | Not study design of interest |
| Tulloch 2011 [191]            | Not about COI                |
| Van Cauwenberghe 2012 [192]   | Not about COI                |
| Van Eperen 2010 [193]         | Not about COI                |
| Varghese 2019 [194]           | Not study design of interest |
| Varghese 2019 [195]           | Not study design of interest |
| Vogel 2020 [196]              | Not about COI                |
| Wagner 2012 [197]             | Not study design of interest |
| Wallen 2013 [198]             | Not about COI                |
| Wang 2019 [199]               | Not about COI                |
| Wayant 2018 [200]             | Not about social media       |
| Weijs 2017 [201]              | Not about COI                |
| Weijs 2019 [202]              | Not about COI                |
| Weinstein 2011 [203]          | Not about COI                |
| Wheelock 2021 [204]           | Not study design of interest |
| White 2007 [205]              | Not about COI                |
| Wilkinson 2018 [206]          | Not about COI                |
| Williams 2011 [207]           | Not about COI                |
| Wisniewski 2017 [208]         | Not about COI                |
| Yan 2020 [209]                | Not study design of interest |
| Yeh 2018 [210]                | Not about COI                |
| Yeo 2020 [211]                | Not about COI                |
| Zember 2015 [212]             | Not about COI                |
| Zenone 2021 [213]             | Not study design of interest |
| Zhitomirsky 2016 [214]        | Not study design of interest |
| Zhou 2018 [215]               | Not study design of interest |

## REFERENCES

1. Aase S. Business of dietetics. Toward e-professionalism: thinking through the implications of navigating the digital world. *Journal of the American Dietetic Association*. 2010;110(10):1442-7.
2. Abdel-Wahab N, Rai D, Siddhanamatha H, Dodeja A, Suarez-Almazor ME, Lopez-Olivo MA. A comprehensive scoping review to identify standards for the development of health information resources on the internet. *PLoS ONE*. 2019;14(6).
3. Aboujaoude E. Problematic Internet use two decades later: Apps to wean us off apps. *CNS Spectrums*. 2019;24(4):371-3.
4. News and Notes. *Addiction*. 2011;106(6):1200-3.
5. AHC M. Updated Ethics Manual Addresses Many New Realities in Clinical Practice. *Medical Ethics Advisor*. 2019;35(3):36-.
6. New draft guidance on financial disclosure. *AIDS Alert*. 2011;26(7):81-2.
7. Aiken T. Dodging the landmines in social media. *Imprint*. 2012;59(2):34-5.
8. Al-Balushi AA. In the Era of Social Media: Is it time to establish a code of online ethical conduct for healthcare professionals? *Sultan Qaboos University medical journal*. 2020;20(1):e25-e8.
9. Alshaiikh EA, Almedimigh AF, Alruwaili AM, Almajnoni AH, Alhajahmed A, Almalki TS, et al. Patient-Focused Online Resources for Melanoma: Highly Variable Content and Quality. *Journal of Cancer Education*. 2019;34(4):775-81.
10. Anderson EE. The role of community-based organizations in the recruitment of human subjects: ethical considerations. *American Journal of Bioethics*. 2010;10(3):20-1.
11. Anderson S, Guyton M. Ethics in an Age of Information Seekers: A Survey of Licensed Healthcare Providers about Online Social Networking. *Journal of Technology in Human Services*. 2013;31(2):112-28.
12. Apperson A, Stellefson M, Paige SR, Chaney BH, Don Chaney J, Wang MQ, et al. Facebook groups on chronic obstructive pulmonary disease: Social media content analysis. *International journal of environmental research and public health*. 2019;16(20):3789.
13. Au CH, Ho KKW, Chiu DKW. Stopping healthcare misinformation: The effect of financial incentives and legislation. *Health policy (Amsterdam)*. 2021;125(5):627-33.
14. Azizi T. The issues surrounding social network sites and healthcare professionals. *Journal of perioperative practice*. 2013;23(10):233-6.
15. The mass media and commercially sponsored research: a call for full disclosure. *Back Letter*. 2008;23(11):126-.
16. Websites on pain a minefield of misinformation. *Back Letter*. 2008;23(4):38-.
17. Baier AL. The Ethical Implications of Social Media: Issues and Recommendations For Clinical Practice. *Ethics & Behavior*. 2019;29(5):341-51.
18. Bamat NA, Manley BJ, Harer MW, Rol, D. Social media for pediatric research: what, who, why, and #? *Pediatric Research*. 2018;84(5):597-9.
19. Barber K. Conflict of Interest—Let the Readers Decide. *Journal of cutaneous medicine and surgery*. 2020;24(3):238-9.
20. Barreda AA, Bilgihan A, Nusair K, Okumus F. Generating brand awareness in Online Social Networks. *Computers in Human Behavior*. 2015;50:600-9.
21. Baxter JD. Are we providers or physicians?...*Arch Intern Med*. 2009 May 11;169(9):829-31. *Archives of Internal Medicine*. 2009;169(18):1725-.
22. Bayne CE, Davies BJ. Chipping away at the body politic one study at a time: the case for more 'unprofessional' online content. *BJU International*. 2017;120(5):609-10.
23. Bechini A, Zanella B, Bonito B, Paoli S, Di Pisa G, Moscadelli A, et al. Quality and safety of vaccines manufacturing: An online survey on attitudes and perceptions of Italian internet users. *Vaccines (Basel)*. 2021;9(9):1015.

24. Becker BW. Research Faux Pas: The Stigma of Wikipedia. *Behavioral & Social Sciences Librarian*. 2015;34(3):165-9.
25. Bertholf RL. Scientific evidence, medical practice, and the insidious danger of anecdotal reports. *Lab Medicine*. 2021;51(6):555-6.
26. Bhat A, Subramanian K. Scientific and social media impact of pharma sponsored research preprints-boon or bane? *Current Medical Research and Opinion*. 2019;35:23.
27. Bibault JE, Katz MS, Motwani S. Social media for radiation oncologists: A practical primer. *Advances in Radiation Oncology*. 2017;2(3):277-80.
28. Blastland M, Freeman ALJ, van der Linden S, Marteau TM, Spiegelhalter D. Five rules for evidence communication. *Nature (London)*. 2020;587(7834):362-4.
29. Bosslet GT. Commentary: The good, the bad, and the ugly of social media. *Academic Emergency Medicine*. 2011;18(11):1221-2.
30. Braccia D. Web connect. Find online resources for conducting comparative effectiveness research. *ONS Connect*. 2009;24(5):16-.
31. Braillon A. The Sunshine Act Has Been for a World that Doesn't Exist Anymore. *The American journal of medicine*. 2018;131(11):e471-e.
32. Braunstein N. Ethical Issues for Students. *Journal of the Academy of Nutrition and Dietetics*. 2012;112(8):1253-4.
33. Bredenoord AL, Boeckhout M. Ancillary Care Obligations for Social Media Platforms. *The American journal of bioethics : AJOB*. 2017;17(3):29-31.
34. Bukhari A, Alshihri S, Abualenain M, Barton J, Kupsy G, Pines JM, et al. "Headache" Online Information: An Evaluation of Readability, Quality, Credibility, and Content. *Permanente journal*. 2021;25(2):1-.
35. Bullock A. Does technology help doctors to access, use and share knowledge? *Medical education*. 2014;48(1):28-33.
36. Cain J, Fink JL. Legal and ethical issues regarding social media and pharmacy education. *American journal of pharmaceutical education*. 2010;74(10):184.
37. Capel I, Wong A, Rowl M, Olusanya O, Malbrain MLNG. Social media in critical care: Variation across professional groups. *Anaesthesiology Intensive Therapy*. 2019;51:57.
38. Carson NJ, Gansner M, Khang J. Assessment of Digital Media Use in the Adolescent Psychiatric Evaluation. *Child and Adolescent Psychiatric Clinics of North America*. 2018;27(2):133-43.
39. Casigliani V, De Nard F, De Vita E, Arzilli G, Grosso FM, Quattrone F, et al. Too much information, too little evidence: Is waste in research fuelling the covid-19 infodemic? *The BMJ*. 2020;370.
40. Casswell S. Conflict of interest and alcohol discourse-a new face but familiar messages. *New Zealand Medical Journal*. 2018;131(1483):59-62.
41. Chan SD. Being professional in the social media world. *The Journal of the American College of Dentists*. 2012;79(4):48-55.
42. Chretien KC, Kind T. Social media and clinical care: Ethical, professional, and social implications. *Circulation*. 2013;127(13):1413-21.
43. Coutts AJ. Dealing With Conflicts of Interest. *International Journal of Sports Physiology & Performance*. 2018;13(10):1257-8.
44. Cunningham A. *Social media and medical professionalism*. Cardiff UK Malden, Massachusetts: Wiley-Blackwell; 2014 2014. 110-2 p.
45. Dainton C. Physician-writers in the age of blogging. *CMAJ: Canadian Medical Association Journal*. 2009;181(5):348-.
46. De Ambrogio M. A doctor's choice. *The Lancet*. 2019;394(10202):908.
47. Decamp M. Social media guidance, conflicts of interest, and health inequalities...*Lancet*. 2012 Apr 28;379(9826):1562. *Lancet*. 2012;380(9840):472-3.

48. DeCamp M, Koenig TW, Chisolm MS. Social media and physicians' online identity crisis. *JAMA - Journal of the American Medical Association*. 2013;310(6):581-2.
49. DeCamp M. Doctors don't disclose conflicts of interest on social media. *Healthcare Risk Management*. 2013;35(1):9-10.
50. DeChello PL. Legal and ethical issues: what the clinician really needs to know. *PARADIGM (Targeted Publications Group, Inc)*. 2012;17(2):20-2.
51. Denecke K. Ethical Aspects of Using Medical Social Media in Healthcare Applications. *Studies in Health Technology & Informatics*. 2014;198:55-62.
52. Dolgin E. The hunt for the lesser-known funding source. *Nature*. 2019;570(7759):127-9.
53. Douglas A, Capdeville M. From Index Medicus to the Palm of Our Hands—What's “App-ening” in Graduate Medical Education. *Journal of Cardiothoracic and Vascular Anesthesia*. 2020;34(8):2133-5.
54. Drone J. It's on Facebook, So It Must Be True. *Journal (Indiana Dental Association)*. 2015;94(4):16-9.
55. Dugdale LS, Braswell H. Instacash: The Ethics of Leveraging Medical Student Status on Social Media. *Academic medicine : journal of the Association of American Medical Colleges*. 2021;96(4):507-11.
56. Physician-owned group or corporation: pros, cons. *ED Management*. 2005;17(4):39-40.
57. Englund H, Chappy S, Jambunathan J, Gohdes E. Ethical reasoning and online social media. *Nurse educator*. 2012;37(6):242-7.
58. Essary AC. The impact of social media and technology on professionalism in medical education. *Journal of Physician Assistant Education*. 2011;22(4):50-3.
59. Failli V, Kleitman N, Lammertse DP, Hsieh JTC, Steeves JD, Fawcett JW, et al. Experimental treatments for Spinal Cord Injury: What you should know. *Topics in Spinal Cord Injury Rehabilitation*. 2021;27(2):50-73.
60. Faloon W. As we see it. Dietary supplements attacked by the media. *Life Extension*. 2006;12(6):7-18.
61. Farrelly R. Nurses and social media. *British journal of nursing (Mark Allen Publishing)*. 2014;23(6):343.
62. Fattore D, Delfino M, Fabbrocini G. Legal, medical, and ethical implications of instant messaging application use in dermatology. *International Journal of Dermatology*. 2019;58(10):e206-e7.
63. Fontanarosa PB, Bauchner H, Golub RM. Thank You to Peer Reviewers, Authors, and Readers of JAMA. *JAMA - Journal of the American Medical Association*. 2019;321(11):1057-8.
64. Doctors should use caution when tweeting. *For the Record (Great Valley Publishing Company, Inc)*. 2011;23(6):30-.
65. Clinicians Lack Guidance for Social Media Disclosures. *For the Record (Great Valley Publishing Company, Inc)*. 2013;25(1):8-9.
66. Frankish K, Ryan C, Harris A. Psychiatry and online social media: potential, pitfalls and ethical guidelines for psychiatrists and trainees. *Australasian Psychiatry*. 2012;20(3):181-7.
67. Galbraith KL. Practical and Ethical Considerations for Using Social Media in Community Consultation and Public Disclosure Activities Consideraciones Prácticas y Éticas para el Uso de los Medios Sociales en las Consultas a la Comunidad y la. *Academic Emergency Medicine*. 2014;21(10):1151-7.
68. Gifford ED, Mouawad NJ, Bowser KE, Bush RL, Chandra V, Coleman DM, et al. Society for Vascular Surgery best practice recommendations for use of social media. *Journal of vascular surgery*. 2021;74(6):1783-91.e1.
69. Gilligan JT, Gologorsky Y. #Fake News: Scientific Research in the Age of Misinformation. *World Neurosurgery*. 2019;131:284.
70. Gordon D. Blogging for medical communication professionals. *AMWA Journal: American Medical Writers Association Journal*. 2010;25(2):83-.



71. Gottlieb M, Dyer S. Information and Disinformation: Social Media in the COVID-19 Crisis. *Academic Emergency Medicine*. 2020;27(7):640-1.
72. Grace PJ. Nurses Spreading Misinformation. *The American journal of nursing*. 2021;121(12):49-53.
73. Grummer-Strawn LM, Holliday F, Jungo KT, Rollins N. Sponsorship of national and regional professional paediatrics associations by companies that make breast-milk substitutes: Evidence from a review of official websites. *BMJ Open*. 2019;9(8).
74. Guo LN, Nambudiri V. 18230 The landscape of podcasting in dermatology: A descriptive analysis. *Journal of the American Academy of Dermatology*. 2020;83(6):AB94.
75. Gupta N, Dorfman R, Saadat S, Roostaeian J. The Plastic Surgery Social Media Influencer: Ethical Considerations and a Literature Review. *Aesthetic surgery journal*. 2020;40(6):691-9.
76. Haddas R, Samtani R, Webb AJ, Burluson JR, Berven SH, Theologis AA, et al. P72. Spine surgeons social dilemma: Benefits and risks of social media for spine surgery practice in the 21st century. *Spine Journal*. 2021;21(9):S174-S5.
77. Haldar S. Advertisement vis-a-vis medical profession. *Journal of the Indian Medical Association*. 2010;108(2):77.
78. Hampton T, Hampton T. NIH eases ethics rules on employees: consulting ban to remain. *JAMA: Journal of the American Medical Association*. 2005;294(14):1749-50.
79. Hanley KJ. A blessing and a curse. *The New York state dental journal*. 2012;78(2):4-5.
80. Harris R. Blog spot. A massive opportunity for the profession. *Synergy News*. 2012:2-.
81. Henderson ML, Chevinsky J. Medical ethics and the media: the value of a story. *The virtual mentor : VM*. 2014;16(8):642-7.
82. Henderson ML, Herbst L, Love AD. Social Media and Kidney Transplant Donation in the United States: Clinical and Ethical Considerations When Seeking a Living Donor. *American Journal of Kidney Diseases*. 2020;76(4):583-5.
83. Henry RK, Pieren JA. The use of social media in dental hygiene programs: a survey of program directors. *Journal of dental hygiene : JDH*. 2014;88(4):243-9.
84. Hernández-Aguado I, Chilet-Rosell E. The role of the media in the health policymaking process: perspectives of key actors in Spain. *Critical Public Health*. 2020;30(3):270-9.
85. Hessari NM, Van Schalkwyk MC, Thomas S, Petticrew M. Reply to comment on maani hessari, n.; van schalkwyk, m.c.; thomas, s.; petticrew, m. alcohol industry csr organisations: What can their twitter activity tell us about their independence and their priorities? a comparative analysis. *int. j. environ. res. public health* 2019, 16, 892. *International Journal of Environmental Research and Public Health*. 2019;16(14).
86. Hetzler PT, Makar KG, Baker SB, Fan KL, Vercler CJ. Time for a Consensus? Considerations of Ethical Social Media Use by Pediatric Plastic Surgeons. *Plastic and reconstructive surgery*. 2020;146(6):841e-2e.
87. Holden A. Social media and professionalism: does the profession need to re-think the parameters of professionalism within social media? *Australian dental journal*. 2017;62(1):23-9.
88. Huby K, Smith J. Relevance of social media to nurses and healthcare: 'to tweet or not to tweet'. *Evidence-based nursing*. 2016;19(4):105-6.
89. Hwang Y, Jeong S-H. "This is a sponsored blog post, but all opinions are my own": The effects of sponsorship disclosure on responses to sponsored blog posts. *Computers in Human Behavior*. 2016;62:528-35.
90. Hwong AR, Qaragholi N, Carpenter D, Joffe S, Campbell EG, Soleymani Lehmann L. A Systematic Review of State and Manufacturer Physician Payment Disclosure Websites: Implications for Implementation of the Sunshine Act. *Journal of Law, Medicine & Ethics*. 2014;42(2):208-19.

91. Islam SMS, Tabassum R, Liu Y, Chen S, Redfern J, Kim SY, et al. The role of social media in preventing and managing non-communicable diseases in low-and-middle income countries: Hope or hype? *Health Policy and Technology*. 2019;8(1):96-101.
92. Jiang XS, Madrigal E, Roy-Chowdhuri S. A Twitter primer: Dos and don'ts for cytopathologists. *Diagnostic Cytopathology*. 2017;45(7):577-9.
93. Jones DM, Guy MC, Soule E, Sakuma K-LK, Pokhrel P, Orloff M, et al. Characterization of Electronic Cigarette Warning Statements Portrayed in YouTube Videos. *Nicotine & tobacco research*. 2021;23(8):1358-66.
94. Joshi KG. How to best use digital technology to help your patients. *Current Psychiatry*. 2020;19(7):47.
95. Facebook: A Bibliographic Analysis of the PsycINFO Database. *Journal of Instructional Psychology*. 2012;39(1):63-5.
96. WMA Guidelines on Promotional Mass Media Appearances by Physicians. *Journal of Korean medical science*. 2015;30(12):1715.
97. Katz MS. Social media and medical professionalism: The need for guidance. *European Urology*. 2014;66(4):633-4.
98. Kh, pur S, Pahwa P. Conflict of interest. *Indian Journal of Dermatology, Venereology & Leprology*. 2009;75(3):225-8.
99. Kirschner KL, Blake V, Hahn D, Timimi FK, Huang M. Social Media: Boon or Boondoggle for Health Care Professionals? *PM and R*. 2013;5(4):335-9.
100. Kleebauer A. New code of conduct a step closer as nurses' feedback taken on board. *Nursing standard (Royal College of Nursing (Great Britain) : 1987)*. 2014;29(3):9.
101. Knoepfler PS. When patients reach out, scientists should reach back carefully. *Nature Medicine*. 2016;22(3):230.
102. Knopf A. Ashley pulls lending website after Twitter scuffle. *Alcoholism & Drug Abuse Weekly*. 2018;30(46):3-4.
103. Korman AM, Fabbro SK. Direct-to-consumer pharmaceutical services in dermatology: Ethical implications. *Journal of the American Academy of Dermatology*. 2021;85(4):1067-8.
104. Kullgren JT, Harkins KA, Bellamy SL, Gonzales A, Tao Y, Zhu J, et al. A Mixed-Methods Randomized Controlled Trial of Financial Incentives and Peer Networks to Promote Walking Among Older Adults. *Health Education & Behavior*. 2014;41(1):43S-50S.
105. Kunze KN, Polce EM, Vadhera A, Williams BT, Nwachukwu BU, Nho SJ, et al. What Is the Predictive Ability and Academic Impact of the Altmetrics Score and Social Media Attention? *American Journal of Sports Medicine*. 2020;48(5):1056-62.
106. Lachman VD. Social Media: Managing the Ethical Issues. *Med-Surg Matters*. 2013;22(5):326-9.
107. Lackner Marx J. Point-Counterpoint: Industry Sponsorship of CME. *AMWA Journal: American Medical Writers Association Journal*. 2012;27(1):20-1.
108. Lagu T, Greysen SR. Physician, monitor thyself: professionalism and accountability in the use of social media. *Journal of Clinical Ethics*. 2011;22(2):187-90.
109. Layng J. From our facebook page. *Today in PT*. 2012;6(3):10-.
110. Lazard AJ. Design cues for tobacco communication: Heuristic interpretations and usability of online health information about harmful chemicals. *International Journal of Medical Informatics*. 2020;141:104177.
111. Lee S, Choeh JY. The determinants of helpfulness of online reviews. *Behaviour & Information Technology*. 2016;35(10):853-63.
112. Lee A, Morling J. COVID19: The need for public health in a time of emergency. *Public Health*. 2020;182:188-9.

113. Lerner BH. Policing online professionalism: Are we too alarmist? *JAMA Internal Medicine*. 2013;173(19):1767-8.
114. Lin W-Y, Zhang X, Song H, Omori K. Health information seeking in the Web 2.0 age: Trust in social media, uncertainty reduction, and self-disclosure. *Computers in Human Behavior*. 2016;56:289-94.
115. Lusic I, Moss S. Health care, research benefit from funds. *ASHA Leader*. 2009;14(6):1-8.
116. Macauley R, Elster N, Fanaroff JM, Comm Med Liability Risk M, Comm B, Committee On Bioethics COML, et al. Ethical considerations in pediatricians' use of social media. *Pediatrics (Evanston)*. 2021;147(3):1.
117. MacWilliam L. Media bias, conflicts of interest: distort study findings on supplements. *Life Extension*. 2006;12(6):58-68.
118. Mansfield SJ, Morrison SG, Stephens HO, Bonning MA, Wang SH, Withers AH, et al. Social media and the medical profession. *Medical Journal of Australia*. 2011;194(12):642-4.
119. Margaret E, Yip W, Mehta MD, Samplaski MK. Male infertility websites: what are our patients reading? *Fertility and Sterility*. 2019;112(3):e422-e3.
120. Mayes C, Williams J, Lipworth W. Conflicted hope: social egg freezing and clinical conflicts of interest. *Health Sociology Review*. 2018;27(1):45-59.
121. McCarthy CP, DeCamp M, McEvoy JW. The Reply. *The American journal of medicine*. 2018;131(11):e473.
122. McComas KA. The role of trust in health communication and the effects of conflicts of interest among scientists. *Proceedings of the Nutrition Society*. 2008;67(4):428-36.
123. McCullough M. One Size Does Not Fit All: The Ethical Imperative to Limit the Concept of Research Exceptionalism. *American Journal of Bioethics*. 2010;10(8):60-1.
124. DOT-COM. *Medical Marketing & Media*. 2016;51(8):22-.
125. Militello M, Yang RA, Anderson JB, Szeto MD, Presley CL, Laughter MR. Social Media and Ethical Challenges for the Dermatologist. *Current dermatology reports*. 2021;10(4):120-7.
126. Milton CL. Ethics and social media. *Nursing science quarterly*. 2014;27(4):283-5.
127. Milton CL. Power with Social Media: A Nursing Perspective. *Nursing science quarterly*. 2016;29(2):113-5.
128. Milton CL. The Ethics of Scholarship With Social Media. *Nursing science quarterly*. 2018;31(4):330-2.
129. Minhas R. New ethical framework for pharmaceutical physicians [6]. *British Medical Journal*. 2006;332(7548):1034.
130. Some plastic surgeons' social media antics raise eyebrows. *Modern Healthcare*. 2017;47(43):0044-.
131. Moodley K. Generalism in healthcare: Ethical challenges in the 21st century. *South African Family Practice*. 2013;55(5):410-1.
132. Moses RE, McNeese LG, Feld LD, Feld AD. Social media in the health-care setting: Benefits but also a minefield of compliance and other legal issues. *American Journal of Gastroenterology*. 2014;109(8):1128-32.
133. Moukarzel S, Caduff A, Rehm M, Del Fresno M, Pérez-Escamilla R, Daly AJ. Breastfeeding communication strategies, challenges and opportunities in the twitter-verse: Perspectives of influencers and social network analysis. *International journal of environmental research and public health*. 2021;18(12):6181.
134. Murakami M, Kumagai A, Stojarov AN, Tsubokura M. Radiation is not a political tool. *Science*. 2019;366(6465):581-2.
135. Muzumdar S, Grant-Kels JM, Farshchian M. Ethics of social media marketing by dermatologists. *Journal of the American Academy of Dermatology*. 2021;85(1):277-8.

136. Naeem SB, Bhatti R, Khan A. An exploration of how fake news is taking over social media and putting public health at risk. *Health information and libraries journal*. 2021;38(2):143-9.
137. Nau JY. When Facebook threatens the ethics of clinical trials. *Revue Medicale Suisse*. 2017;13(588):2098-9.
138. Neuer K, Angenendt A. The clinical trial in the area of conflict among real world data, social media and data protection - Quo vadis? Report on the 26th Symposium of the Federal Association of Contract Research Organizations (BVMA e. V.) on November 23, 2018 in Munich. *Pharmazeutische Industrie*. 2019;81(2):224-30.
139. Neville P, Waylen A. Social media and dentistry: some reflections on e-professionalism. *British dental journal*. 2015;218(8):475-8.
140. Neville P. Clicking on professionalism? Thoughts on teaching students about social media and its impact on dental professionalism. *European journal of dental education : official journal of the Association for Dental Education in Europe*. 2016;20(1):55-8.
141. News and ethics resources. *Nursing Ethics*. 2015;22(1):153-5.
142. TWEETS OF THE WEEK. *Nursing Standard*. 2016;30(51):30-.
143. Social networking: avoiding the pitfalls. *Nursing times*. 2011;107(37):15.
144. O'Glasser AY, Jaffe RC, Brooks M. To Tweet or Not to Tweet, That Is the Question. *Seminars in nephrology*. 2020;40(3):249-63.
145. O'Hanlon S, Shannon B. Comments further to: privacy, professionalism and Facebook: a dilemma for young doctors. *Medical education*. 2011;45(2):209.
146. O'Keeffe M, Barratt A, Maher C, Zadro J, Fabbri A, Jones M, et al. Media Coverage of the Benefits and Harms of Testing the Healthy: A protocol for a descriptive study. *BMJ Open*. 2019;9(8).
147. O'Rourke PP, Carrithers J, Patrick-Lake B, Rice TW, Corsmo J, Hart R, et al. Harmonization and streamlining of research oversight for pragmatic clinical trials. *Clinical Trials*. 2015;12(5):449-56.
148. Best of the Blogs. *Oncology (08909091)*. 2012;26(9):814-5.
149. Ong EG, Davis L, Sanchez A, Curiel R, Stohl H, Nelson A, et al. A COMPREHENSIVE REVIEW OF WOMEN'S QUESTIONS FOLLOWING MISCARRIAGE on DIFFERENT SOCIAL MEDIA PLATFORMS. *Journal of Investigative Medicine*. 2021;70:197.
150. At a glance. Cleveland Clinic posts MD-industry ties. *OR Manager*. 2009;25(1):32-.
151. Oransky I. Web: bloggers beware: conflicts of interest and diabetes. *Lancet*. 2006;368(9548):1641-2.
152. Ornstein C. Cardiac Society Draws Bulk of Funding from Stent Makers. *Gerson Healing Newsletter*. 2011;26(5):4-.
153. Padeiro M, Bueno-Larraz B, Freitas Â. Local governments' use of social media during the COVID-19 pandemic: The case of Portugal. *Government information quarterly*. 2021;38(4).
154. Pagoto S, Nebeker C. How scientists can take the lead in establishing ethical practices for social media research. *Journal of the American Medical Informatics Association*. 2019;26(4):311-3.
155. Parasidis E, Pike E, McGraw D. A belmont report for health data. *New England Journal of Medicine*. 2019;380(16):1493-5.
156. Paterson D. Telemedicine and conflicts of interest [2]. *Veterinary Record*. 2019;185(7):209.
157. Peltier B, Curley A. The ethics of social media in dental practice: ethical tools and professional responses. *Journal of the California Dental Association*. 2013;41(7):507-13.
158. Pelton RW, Newsom TH. Is it advantageous for physicians to use social media to enhance their online presence and reputation? *Ocular Surgery News*. 2012;30(17):11-.
159. Pierce G. Payment Options in Step with the Times. *Podiatry Management*. 2019;38(8):87-90.
160. Prasad V. Inconsistent Reporting of Potential Conflicts of Interest. *JAMA Internal Medicine*. 2018;178(10):1424-5.

161. Prateek S, Tak H. Social media and physicians: the Indian scenario. *Indian journal of medical ethics*. 2018;3(1):83.
162. Ragan MR. Social media in the health care provider office. *Today's FDA : official monthly journal of the Florida Dental Association*. 2012;24(4):20-3.
163. Ranpariya V, Chu B, Fathy R, Lipoff JB. Dermatology without dermatologists? Analyzing Instagram influencers with dermatology-related hashtags. *Journal of the American Academy of Dermatology*. 2020;83(6):1840-2.
164. Ravn S, Barnwell A, Barbosa Neves B. What Is “Publicly Available Data”? Exploring Blurred Public–Private Boundaries and Ethical Practices Through a Case Study on Instagram. *Journal of empirical research on human research ethics*. 2020;15(1-2):40-5.
165. Rechenberg U, Josten C, Grüner S, Klima S. How does our specialty present itself on the Internet? *Zeitschrift für Orthopädie und Unfallchirurgie*. 2013;151(4):394.
166. Redick DW, Hwang JC, Kloosterboer A, Yannuzzi NA, Patel NA, Kuriyan AE, et al. Content, Readability, and Accountability of Freely Available Online Information for Patients Regarding Epiretinal Membranes. *Seminars in ophthalmology*. 2022;37(1):67-70.
167. New FDA guidance on clinical investigator financial disclosure. *Research Practitioner*. 2011;12(4):143-9.
168. Roucka TM, Donate-Bartfield E, Zarkowski P. In social media age, watch what you say. *General dentistry*. 2014;62(1):19-21.
169. Rouprêt M, Morgan TM, Bostrom PJ, Cooperberg MR, Kutikov A, Linton KD, et al. European Association of Urology (@Uroweb) recommendations on the appropriate use of social media. *European Urology*. 2014;66(4):628-32.
170. Samsa G, Solomon A. Managing the science in the presence of financial conflict of interest. *Accountability in Research*. 2019;26(6):397-403.
171. Santillan-Doherty P, Grether-Gonzalez P, Medina-Arellano MJ, Chan S, Tapia-Ibarguengoitia R, Brena-Sesma I, et al. Considerations on genetic engineering: regarding the birth of twins subjected to gene edition. *Gaceta Medica de Mexico*. 2020;156(1):53-9.
172. Santoro E. Social media and health communication: Do we need rules? *Recenti Progressi in Medicina*. 2015;106(1):15-6.
173. Santoro E. [Social media and health: it's time to refine the methodology for interpreting studies and evaluating information.]. *Social media e salute: affinare la metodologia per interpretare e valutare le informazioni*. 2022;113(2):73-5.
174. Sartor O. Conflicts of Interest, Baselga, and Clinical Trialists. *Oncologist*. 2018;23(12):1394-.
175. Scruth EA, Pugh DM, Adams CL, Foss-Durant AM. Electronic and social media: the legal and ethical issues for healthcare. *Clinical nurse specialist CNS*. 2015;29(1):8-11.
176. Seppey M, Ridde V, Touré L, Coulibaly A. Donor-funded project's sustainability assessment: a qualitative case study of a results-based financing pilot in Koulikoro region, Mali. *Globalization & Health*. 2017;13:1-15.
177. Sh, J, Turner S. System wide collaboration? Health and social care leaders' perspectives on working across boundaries. *Journal of Integrated Care*. 2019;27(1):83-94.
178. Sharma P, Francis DP. Social media influencers in cardiology/metabolism—a force for good or evil? *Heart and Metabolism*. 2020(82):36-40.
179. Shore R, Halsey J, Shah K, Crigger B-J, Douglas SP. Report of the AMA Council on Ethical and Judicial Affairs: professionalism in the use of social media. *Journal of Clinical Ethics*. 2011;22(2):165-72.
180. Silva DAF, Colleoni R. Patient's privacy violation on social media in the surgical area. *American Surgeon*. 2018;84(12):1900-5.
181. Sissung TM, Figg WD. Facebook groups for alternative treatments for cancer: advertising masquerading as community support. *The lancet oncology*. 2021;22(1):25-6.

182. Slagle E, Sinacore J, Brubaker L. Conflict of interest disclosure in obstetrics & gynecology. *Obstetrics & Gynecology*. 2011;118(5):1108-10.
183. Smyth D. Web words. Breaking bad news: part 2. *International Journal of Palliative Nursing*. 2005;11(1):46-.
184. Snyder L. Online professionalism: social media, social contracts, trust, and medicine. *Journal of Clinical Ethics*. 2011;22(2):173-5.
185. Studenic P, Stones S, Alunno A, Ritschl V, Nikiphorou E. People with rheumatic and musculoskeletal diseases connect and learn about health-related issues using social media. *Annals of the Rheumatic Diseases*. 2019;78:2078.
186. Swartz MK. Professional Conduct and Social Media. *Journal of pediatric health care : official publication of National Association of Pediatric Nurse Associates & Practitioners*. 2016;30(3):185-6.
187. Tanchuco JQ. Pandemic publication ethics. *Phillippine Journal of Internal Medicine*. 2020;58(3):1-3.
188. Technology, Practice Committees of the American Society for Reproductive M, the Advertising Committee of the Society for Assisted Reproductive T, Technology, Practice Committees of the American Society for Reproductive M, the Advertising Committee of the Society for Assisted Reproductive Technology. Electronic address Aao. Guidance on the use of social media in reproductive medicine practice. *Fertility and sterility*. 2021;115(5):1151-5.
189. Terrasse M, Gorin M, Sisti D. Social Media, E-Health, and Medical Ethics. *Hastings Center Report*. 2019;49(1):24-33.
190. What nurses are saying. *The American nurse*. 2015;47(1):10.
191. Tulloch J, Zinn J. Risk, health and the media. *Health, Risk & Society*. 2011;13(1):1-16.
192. van Cauwenberghe CE. Stakeholders portrait in the pharmaceutical industry. C. E. van Cauwenberghe, Frost and Sullivan, United States 2012. 38-44 p.
193. Van Eperen L, Marincola FM, Strohm J. Bridging the divide between science and journalism. *Journal of Translational Medicine*. 2010;8:25.
194. Varghese TK, Entwistle JW, Mayer JE, Moffatt-Bruce SD, Sade RM. Ethical standards for cardiothoracic surgeons' participation in social media. *The Journal of thoracic and cardiovascular surgery*. 2019;158(4):1139-43.
195. Varghese TK, Entwistle JW, Mayer JE, Moffatt-Bruce SD, Sade RM, Blitzer D, et al. Ethical Standards for Cardiothoracic Surgeons' Participation in Social Media. *The Annals of thoracic surgery*. 2019;108(3):666-70.
196. Vogel EA, Guillory J, Ling PM. Sponsorship Disclosures and Perceptions of E-cigarette Instagram Posts. *Tobacco regulatory science*. 2020;6(5):355-68.
197. Wagner L, Paquin R, Persky S. Genetics blogs as a public health tool: Assessing credibility and influence. *Public Health Genomics*. 2012;15(3-4):218-25.
198. Wallen B. NYSCHP Corporate Sponsor Scholarship Essay Award: Social Media, Friend or Foe? *Journal of Pharmacy Practice*. 2013;26(4):454-5.
199. Wang Z, Wang S, Zhang Y, Jiang X. Social media usage and online professionalism among registered nurses: A cross-sectional survey. *International Journal of Nursing Studies*. 2019;98:19-26.
200. Wayant C, Turner E, Meyer C, Sinnett P, Vassar M. Financial Conflicts of Interest Among Oncologist Authors of Reports of Clinical Drug Trials. *JAMA Oncology*. 2018;4(10):1426-8.
201. Weijs C, Majowicz S, Coe JB, Desmarais S, Jones-Bitton A. The personal use of Facebook by public health professionals in Canada: Implications for public health practice. *Journal of Communication in Healthcare*. 2017;10(1):8-15.
202. Weijs C, Coe J, Desmarais S, Majowicz S, Jones-Bitton A. Effects of Mock Facebook Workday Comments on Public Perception of Professional Credibility: A Field Study in Canada. *Journal of Medical Internet Research*. 2019;21(4):N.PAG-N.PAG.

203. Weinstein ALBS, Saadeh PBMD, Warren SMMD. Social networking services: Implications for the next generation of physicians. *Surgery*. 2011;150(1):15-6.
204. Wheelock A, Ives J. Vaccine confidence, public understanding and probity: time for a shift in focus? *Journal of medical ethics*. 2021;48(4):250-5.
205. White E. Funding for research. *Mental Health Occupational Therapy*. 2007;12(3):93-.
206. Wilkinson J. Accessible, Dynamic Web Content Using Instagram. *Information Technology & Libraries*. 2018;37(1):19-26.
207. Williams JB, Mathews R, D'Amico TA. "Reality surgery" a research ethics perspective on the live broadcast of surgical procedures. *Journal of Surgical Education*. 2011;68(1):58-61.
208. Wisniewski J. A Matter of Trust: A Webmaster Perspective. *Online Searcher*. 2017;41(4):66-8.
209. Yan Q, Goei C, Jensen K, Langley A, Pounds L, Davies M. Quality and Readability of Online Patient Resources for Varicose Veins—Do We Know What Is Out There? *Journal of Vascular Surgery: Venous and Lymphatic Disorders*. 2020;8(2):330.
210. Yeh RW. Academic Cardiology and Social Media: Navigating the Wisdom and Madness of the Crowd. *Circulation: Cardiovascular Quality & Outcomes*. 2018;11(4):1-3.
211. Yeo S, Eigl B, Ingledew PA. A fountain of knowledge? The quality of online resources for testicular cancer patients. *Canadian Urological Association Journal*. 2020;23:23.
212. Zember WF, Fishman EK, Horton KM, Raman SP. How social media can impact medicine and radiology. *Journal of the American College of Radiology*. 2015;12(6):620-1.
213. Zenone M, Kenworthy N, Barbic S. The Paradoxical Relationship Between Health Promotion and the Social Media Industry. *Health promotion practice*. 2021:15248399211064640.
214. Zhitomirsky-Geffet M, Bratspiess Y. Professional information disclosure on social networks: The case of Facebook and Linked In in Israel. *Journal of the Association for Information Science & Technology*. 2016;67(3):493-504.
215. Zhou J, Bercovitch L. Instagram and the dermatologist: An ethical analysis. *Journal of the American Academy of Dermatology*. 2018;78(6):1226-8.
