# Supplementary material for: Conflict of interest and funding in health communication on social media: a systematic review
Source: PubMed Central journal article supplement — BMJ Open. 2023 Aug 14;13(8):e072258. doi: 10.1136/bmjopen-2023-072258 (PMC10432670; doi:10.1136/bmjopen-2023-072258), 2023-08-14
Supplement: bmjopen-2023-072258supp005.pdf [file bmjopen-2023-072258supp005.pdf]

**Supplementary file 5:** Characteristics of the 17 included studies related to conflicts of interest.

| Author, Year        | Date of search/data collection | Start Upload Date | End Upload Date | Period of coverage | Population                                                                                                                                                                        | Study outcomes                         | Funding of the study | COI of study authors | Country of study authors | Country of the subjects of study | Type of social media             | Focus                                                                               | Language of posts    | Subject of COI                                                                                           | Type of COI   | Sources of COI | Tools to assess the presence of COI | Results                                                                                                                                                                                                                                                                                                                                                                                                                                           |
|---------------------|--------------------------------|-------------------|-----------------|--------------------|-----------------------------------------------------------------------------------------------------------------------------------------------------------------------------------|----------------------------------------|----------------------|----------------------|--------------------------|----------------------------------|----------------------------------|-------------------------------------------------------------------------------------|----------------------|----------------------------------------------------------------------------------------------------------|---------------|----------------|-------------------------------------|---------------------------------------------------------------------------------------------------------------------------------------------------------------------------------------------------------------------------------------------------------------------------------------------------------------------------------------------------------------------------------------------------------------------------------------------------|
| Betschart 2020 [22] | May 2019                       | July 2007         | May 2019        | 12 years           | Cross-sectional: Survey of 159 YouTube videos addressing treatment options for lower urinary tract symptoms with benign prostatic hyperplasia                                     | Frequency of reporting of COI          | Not reported         | None                 | Switzerland and Germany  | Not reported                     | YouTube                          | Urology: lower urinary tract symptoms associated with benign prostatic hyperplasia. | English              | Physicians, clinic, hospital, or university<br><br>Others: Industry, news media, societies/organizations | Not specified | Not specified  | None                                | <ul style="list-style-type: none"> <li>1.3% (2/159) videos included a disclosure of conflicts of interest</li> <li>83.6% (133/159) of the videos were subject to commercial bias (defined as information presented in a manner that attempts to sway participants' opinions in favor of a particular commercial product for the express purpose of furthering a commercial entity's business, meaning a deliberate intent to mislead).</li> </ul> |
| Chretien 2009 [30]  | March/April 2009               | N/A               | N/A             | N/A                | Cross-sectional: Electronic survey of 78 deans of student affairs, their representatives, or counterparts from US medical schools in the Association of American Medical Colleges | Unprofessional incidents involving COI | Not reported         | None                 | United States            | United States                    | Web 2.0: not specified otherwise | General                                                                             | English <sup>1</sup> | Medical students                                                                                         | Not specified | Industry       | None                                | <ul style="list-style-type: none"> <li>4% (2/46) of all reported unprofessional incidents involved conflicts of interest (e.g., product endorsement without a COI disclosure)</li> </ul>                                                                                                                                                                                                                                                          |
| Chretien 2011[21]   | May 2010                       | May 1, 2010       | May 31, 2010    | 1 month            | Cross-sectional:                                                                                                                                                                  | Unprofessional                         | Not reported         | None                 | United States            | United States,                   | Twitter                          | General: surgery,                                                                   | English              | Physicians                                                                                               | Not specified | Industry       | None                                | <ul style="list-style-type: none"> <li>8.3% (12/144) of unprofessional tweets</li> </ul>                                                                                                                                                                                                                                                                                                                                                          |

|                   |               |              |               |        |                                                                                                   |                                                |                                                                                     |                                                                                                                                                                        |                |                                                |               |                                                                                                                          |                      |                                                                        |                                 |                    |      |                                                                                                                                                                                                                                                                        |
|-------------------|---------------|--------------|---------------|--------|---------------------------------------------------------------------------------------------------|------------------------------------------------|-------------------------------------------------------------------------------------|------------------------------------------------------------------------------------------------------------------------------------------------------------------------|----------------|------------------------------------------------|---------------|--------------------------------------------------------------------------------------------------------------------------|----------------------|------------------------------------------------------------------------|---------------------------------|--------------------|------|------------------------------------------------------------------------------------------------------------------------------------------------------------------------------------------------------------------------------------------------------------------------|
|                   |               |              |               |        | Survey of 5156 tweets of 260 self-identified physicians with >500 followers                       | tweets involving 'possible' COI                |                                                                                     |                                                                                                                                                                        |                | Europe, Canada, Asia, Australia, not specified |               | internal medicine, family medicine, pediatrics, psychiatry, emergency medicine, obstetrics/gynecology, and not specified |                      |                                                                        |                                 |                    |      | involved 'possible' conflicts of interest (i.e., making unsupported claims about a product being sold on the physician's website or repeatedly promoting specific health products)                                                                                     |
| Greysen 2012 [10] | N/A           | N/A          | N/A           | N/A    | Cross-sectional: Survey of 48 executive directors of all medical and osteopathic boards in the US | Unprofessional incidents involving COI         | Funded by the Robert Wood Johnson Foundation and the Department of Veterans Affairs | 1/5 reported serving as a scientific advisory board member for Fair Health Inc and receiving funding as a collaborator on the Yale University Open Data Access project | United States  | United States                                  | Not specified | General                                                                                                                  | English <sup>1</sup> | Physicians                                                             | Not specified                   | Not specified      | None | <ul style="list-style-type: none"> <li>56% of state medical boards indicated that they received reports of violations related to "failure to reveal conflicts of interest online" (estimated percentage from the figure)</li> </ul>                                    |
| Hessari 2019 [31] | December 2016 | January 2016 | December 2016 | 1 year | Cross-sectional: Survey of a total of 2805 tweets of Alcohol industry (AI)-                       | Association between COI and content of posting | None                                                                                | None                                                                                                                                                                   | United Kingdom | United Kingdom, Ireland, Australia             | Twitter       | Social aspects/public relations organizations related to alcohol                                                         | English <sup>1</sup> | Alcohol industry (AI)-funded organizations and non-AI-funded charities | Sponsorship by alcohol industry | Alcohol industries | None | <ul style="list-style-type: none"> <li>None (0/1156) of alcohol-industry funded organizations tweets mentioned alcohol marketing, advertising, and sponsorship; issues related to alcohol pricing; physical health harms, including cancers, heart disease,</li> </ul> |

|                    |                |     |     |     |                                                                                                                                                                                                                                |                                                                                     |              |                                                                         |               |               |         |                     |         |                                |                        |                            |                        |                                                                                                                                                                                                                                                                                                                                                                                                                                                                                                                                                                                                                                                                                                                                                                                                                            |                                                                                                                                                                                                                                                                                                                                                                                             |
|--------------------|----------------|-----|-----|-----|--------------------------------------------------------------------------------------------------------------------------------------------------------------------------------------------------------------------------------|-------------------------------------------------------------------------------------|--------------|-------------------------------------------------------------------------|---------------|---------------|---------|---------------------|---------|--------------------------------|------------------------|----------------------------|------------------------|----------------------------------------------------------------------------------------------------------------------------------------------------------------------------------------------------------------------------------------------------------------------------------------------------------------------------------------------------------------------------------------------------------------------------------------------------------------------------------------------------------------------------------------------------------------------------------------------------------------------------------------------------------------------------------------------------------------------------------------------------------------------------------------------------------------------------|---------------------------------------------------------------------------------------------------------------------------------------------------------------------------------------------------------------------------------------------------------------------------------------------------------------------------------------------------------------------------------------------|
|                    |                |     |     |     | funded organizations (1156 tweets) and non-AI-funded charities (1649 tweets)                                                                                                                                                   |                                                                                     |              |                                                                         |               |               |         | awareness           |         |                                |                        |                            |                        |                                                                                                                                                                                                                                                                                                                                                                                                                                                                                                                                                                                                                                                                                                                                                                                                                            | <ul style="list-style-type: none"> <li>dementia and diabetes; and fertility and pregnancy</li> <li><b>10.1%</b> (166/1649) of non-industry-funded organizations tweets mentioned alcohol marketing, advertising, and sponsorship; issues related to alcohol pricing; physical health harms, including cancers, heart disease, dementia and diabetes; and fertility and pregnancy</li> </ul> |
| Kaestner 2017 [29] | Jan 7-25, 2017 | N/A | N/A | N/A | Cross-sectional: Survey of twitter accounts of 156 hematologist-oncologists in the US with a FCOI (at least US\$1000 in 2014), and frequent tweets (at least 100 total Tweets); physicians with private accounts were excluded | Proportion of undisclosed COI<br><br>Association between COI and content of posting | Not reported | 1/4 reported receiving payments for his book "Ending Medical Reversal". | United States | United States | Twitter | Hematology-oncology | English | Hematology-oncology physicians | Financial COI: payment | Biopharmaceutical industry | Open Payments database | <ul style="list-style-type: none"> <li><b>1.3%</b> (2/156 physicians) of U.S-based hematologist-oncologists, who had financial conflicts of interest according to OPD, included disclosures of their payments, and these were in their 5-line twitter biography.</li> <li><b>81%</b> (126/156) of physicians mentioned at least one drug from a company for which they had a FCOI</li> <li>Of 4358 total drug mentions, 52% (2252/4358) regarded conflicted drugs.</li> <li>Association between COI and coding of tweets (positive, neutral, or negative):<br/>conflicted tweets were more likely to be positive (p=0.02), similarly likely to be neutral (p=0.45), and less likely to be negative (p=0.008)</li> <li>General payment FCOI: Median \$13,668 (IQR, \$4,292-\$33,213)<br/>Range \$1,031-\$444,055</li> </ul> |                                                                                                                                                                                                                                                                                                                                                                                             |

|                     |                        |                 |                   |        |                                                                          |                                                    |                                                                                  |              |               |               |                                                                               |                    |                      |                                                                                                          |                                                                                                                        |                                                                   |                        |                                                                                                                                                                                                                                                                                                                                                                                                                                                                                                              |
|---------------------|------------------------|-----------------|-------------------|--------|--------------------------------------------------------------------------|----------------------------------------------------|----------------------------------------------------------------------------------|--------------|---------------|---------------|-------------------------------------------------------------------------------|--------------------|----------------------|----------------------------------------------------------------------------------------------------------|------------------------------------------------------------------------------------------------------------------------|-------------------------------------------------------------------|------------------------|--------------------------------------------------------------------------------------------------------------------------------------------------------------------------------------------------------------------------------------------------------------------------------------------------------------------------------------------------------------------------------------------------------------------------------------------------------------------------------------------------------------|
|                     |                        |                 |                   |        |                                                                          |                                                    |                                                                                  |              |               |               |                                                                               |                    |                      |                                                                                                          |                                                                                                                        |                                                                   |                        | More than half of drug mentions refer to a median of six companies that pay these physicians                                                                                                                                                                                                                                                                                                                                                                                                                 |
| Lagu 2008 [23]      | December 14, 2006      | January 1, 2006 | December 14, 2006 | 1 year | Cross-sectional: Survey of 271 health-related blogs by doctors or nurses | Frequency of reporting of COI                      | Partially funded by The Robert Wood Johnson Foundation Clinical Scholars program | None         | United States | Not reported  | Blogs (Medlogs, Yahoo Health and Medicine Blogs and The Medical Blog Network) | General            | English <sup>1</sup> | Physicians and nurses                                                                                    | Not specified                                                                                                          | Industry                                                          | None                   | <ul style="list-style-type: none"> <li>▪ <b>None</b> (0/31) of the blogs that explicitly promoted a specific healthcare product (i.e., providing product images, descriptions, or advocacy) disclosed conflicts of interest.</li> </ul>                                                                                                                                                                                                                                                                      |
| Miller 2011 [12]    | June 2007 and May 2008 | N/A             | N/A               | N/A    | Cross-sectional: Survey of 951 health blogs                              | Frequency of reporting of COI                      | Not reported                                                                     | Not reported | United States | Not reported  | Blogs                                                                         | General            | English              | Physicians<br>Others: other non-physician health professionals, patient, individual, consumer, caregiver | Funding/sponsorship                                                                                                    | Corporation, Web site, medical group, foundation, or other entity | None                   | <ul style="list-style-type: none"> <li>▪ <b>15.6%</b> (148/951) of health blogs reported sponsorship</li> </ul> <p>Sponsorship stratified by occupation (p=0.053):</p> <ul style="list-style-type: none"> <li>▪ <b>14.9%</b> (29/194) of physicians reported sponsorship in their blogs</li> <li>▪ <b>19.7%</b> (50/254) of other health professionals reported sponsorship in their blogs</li> <li>▪ <b>12.9%</b> (58/451) of non-health-related occupations reported sponsorship in their blogs</li> </ul> |
| Niforatos 2019 [18] | N/A                    | June 1, 2017    | June 1, 2018      | 1 year | Cross-sectional: Survey of 31 FOAMed blogs and websites                  | Prevalence of COI<br>Proportion of undisclosed COI | Not reported                                                                     | None         | United States | United States | Blog posts and website entries                                                | Emergency medicine | English <sup>1</sup> | Emergency medicine physicians                                                                            | Financial: 1) compensation for services other than consulting, including serving as faculty or as a speaker at a venue | Industry                                                          | Open Payments database | <ul style="list-style-type: none"> <li>▪ <b>15.4%</b> (45/292) of U.S.-based healthcare providers had FCOI in the 2017 Open Payments database.</li> <li>▪ Of the 12 bloggers who had 'significant' FCOI (defined as general or research payments &gt;\$5,000 from a single company over a 12-month period): <b>0%</b></li> </ul>                                                                                                                                                                             |

|                     |             |     |     |     |                                                                                         |                               |              |      |       |       |         |                                 |          |                                                                                                                                                                                                                                                            |               |               |      |                                                                                                                                                                                                                                                                                                                                                                                                                                 |
|---------------------|-------------|-----|-----|-----|-----------------------------------------------------------------------------------------|-------------------------------|--------------|------|-------|-------|---------|---------------------------------|----------|------------------------------------------------------------------------------------------------------------------------------------------------------------------------------------------------------------------------------------------------------------|---------------|---------------|------|---------------------------------------------------------------------------------------------------------------------------------------------------------------------------------------------------------------------------------------------------------------------------------------------------------------------------------------------------------------------------------------------------------------------------------|
|                     |             |     |     |     |                                                                                         |                               |              |      |       |       |         |                                 |          | other than a continuing education program; 2) consulting fee; 3) travel and lodging; 4) honoraria; 5) food and beverage; and (6) education.                                                                                                                |               |               |      | (0/12) disclosed FCOI in their FOAMed content. <ul style="list-style-type: none"> <li>General payment FCOI: Median \$191 (IQR, \$94.1–\$829) Range \$38,132</li> <li>Research payment FCOI: Median \$15,703 (IQR, \$10,262–\$72,916) Range \$127,261</li> <li>Type of FCOI: Food and beverages (85.8%), Travel and lodging (8.6%), Other services (1.9%), Honoraria (1.9%), consulting (1.2%), and education (0.6%).</li> </ul> |
| Nishizaki 2021 [24] | August 2021 | N/A | N/A | N/A | Cross-sectional: Survey of 72 YouTube videos reporting on pediatrics nocturnal enuresis | Frequency of reporting of COI | Not reported | None | Japan | Japan | YouTube | Pediatrics : nocturnal enuresis | Japanese | 1. Physicians, nurses<br>2. non-health personnel: (1) academic (authors/uploaders affiliated with research groups or universities/colleges); (2) non-physician health personnel (pharmacist/s/chiropractors/acupuncturists); (4) independent user (nursery | Not specified | Not specified | None | <ul style="list-style-type: none"> <li>0% (0/72) of videos had a conflicts of interest declaration by the uploader</li> <li>0% (0/72) videos were judged to have a commercial bias</li> </ul>                                                                                                                                                                                                                                   |

|                      |              |               |               |          |                                                                                                                                                                                                                                          |                               |      |      |                      |              |         |                                                                                   |                                      |                                                                                                                                 |               |               |      |                                                                                                                                                                                                                                                                                                                                                                                                                                       |
|----------------------|--------------|---------------|---------------|----------|------------------------------------------------------------------------------------------------------------------------------------------------------------------------------------------------------------------------------------------|-------------------------------|------|------|----------------------|--------------|---------|-----------------------------------------------------------------------------------|--------------------------------------|---------------------------------------------------------------------------------------------------------------------------------|---------------|---------------|------|---------------------------------------------------------------------------------------------------------------------------------------------------------------------------------------------------------------------------------------------------------------------------------------------------------------------------------------------------------------------------------------------------------------------------------------|
|                      |              |               |               |          |                                                                                                                                                                                                                                          |                               |      |      |                      |              |         |                                                                                   |                                      | schoolteachers/schoolteachers), and (5) patient and family                                                                      |               |               |      |                                                                                                                                                                                                                                                                                                                                                                                                                                       |
| Pratsinis, 2021 [25] | October 2019 | December 2006 | December 2018 | 12 years | Cross-sectional: 100 YouTube videos addressing treatment options of urinary stones                                                                                                                                                       | Frequency of reporting of COI | None | None | Switzerland, Germany | Not reported | YouTube | Urology: surgical treatment of urinary stones                                     | English                              | Physicians, clinic, hospital or university<br><br>Industry, consumer/patient, medical societies/or organizations and news media | Not specified | Not specified | None | <ul style="list-style-type: none"> <li>9% (9/100) of YouTube videos had a declaration of COI</li> <li>72% of all videos were issued by healthcare providers or medical industry</li> </ul>                                                                                                                                                                                                                                            |
| Pratsinis 2021 [26]  | October 2020 | January 2008  | June 2020     | 12 years | Cross-sectional: Survey of 240 YouTube videos reporting on benign prostatic hyperplasia, prostate cancer, and urinary stone disease. The 20 most viewed videos for each urological condition and language were included in the analysis. | Frequency of reporting of COI | None | None | Switzerland          | Not reported | YouTube | Urology: benign prostatic hyperplasia, prostate cancer, and urinary stone disease | English, French, German, and Italian | Physicians, clinic, hospital or university<br><br>Industry, consumer/patient, medical societies/or organizations and news media | Not specified | Not specified | None | <ul style="list-style-type: none"> <li>“Majority” of all videos did not have declaration of conflicts of interest</li> <li>Estimated percentage of COI declaration: across 12 categories, proportion of videos reporting on COI ranges from 4.4%-35%, with a median of 19%; the total percentage of reporting of COI in the 240 videos is 19%</li> <li>No differences in reported COI for the different languages assessed</li> </ul> |

|                  |                         |     |     |     |                                                                                       |                               |                                                                                                                                  |                                                               |               |               |                         |                     |                      |                                |                                                    |                                                                                                                    |                        |                                                                                                                                                                                                                                                                                                                                                                                                                                                                                                         |
|------------------|-------------------------|-----|-----|-----|---------------------------------------------------------------------------------------|-------------------------------|----------------------------------------------------------------------------------------------------------------------------------|---------------------------------------------------------------|---------------|---------------|-------------------------|---------------------|----------------------|--------------------------------|----------------------------------------------------|--------------------------------------------------------------------------------------------------------------------|------------------------|---------------------------------------------------------------------------------------------------------------------------------------------------------------------------------------------------------------------------------------------------------------------------------------------------------------------------------------------------------------------------------------------------------------------------------------------------------------------------------------------------------|
| Shrank 2011 [28] | November 17, 2010.      | N/A | N/A | N/A | Cross-sectional: Survey of 15 social networking sites (93% featured blogging)         | Frequency of reporting of COI | Funded (by a research grant from CVS Caremark and a career development award from the National Heart, Lung, and Blood Institute) | None                                                          | United States | All countries | Social network websites | Diabetes            | All languages        | Health bloggers                | Financial                                          | Volunteer donation, foundation, pharmaceutical manufacturer, device manufacturer, insurer, not-for-profit, webhost | None                   | <p>1. Industry sponsorship: Pharmaceutical manufacturers: <b>53.3%</b> (8/15)</p> <p>Diabetes device manufacturers: <b>60%</b> (9/15)</p> <p>Webhost Sponsorship: <b>13.3%</b> (2/15)</p> <p>2. Foundation sponsorship: <b>20%</b> (3/15)</p> <p>3. Voluntary donations: <b>26.7%</b> (4/15)</p> <p>4. No industry sponsorship: <b>20%</b> (3/15)</p> <p>5. Insurers: <b>20%</b> (3/15)</p> <p>6. Not-for-profit: <b>26.7%</b> (4/15)</p>                                                               |
| Tao 2017 [19]    | June 1 - August 1, 2016 | N/A | N/A | N/A | Cross-sectional: Survey of Twitter accounts of 634 hematologist-oncologists in the US | Prevalence of COI             | Funded by Laura and John Arnold Foundation                                                                                       | 1/4 reported receiving payments for contributions to Medscape | United States | United States | Twitter                 | Hematology-oncology | English <sup>1</sup> | Hematology-oncology physicians | Financial (general payments and research payments) | Industry                                                                                                           | Open Payments database | <p>▪ <b>79.5%</b> (504/634) of U.S.-based hematologist-oncologists were reported on the Open Payment Database for having at least 1 FCOI</p> <p>▪ Type of COI: General and research payments: 41% (262/634) of hematologist-oncologists<br/>Receiving general payment: 72.4% (459/634) of hematologist-oncologists<br/>Prevalence research payment: 48.4% (307/634) of hematologist-oncologists</p> <p>▪ General payment FCOI: Median \$1,644 (IQR, \$129-\$13,744)</p> <p>▪ Research payment FCOI:</p> |

|                |               |                                                             |                |          |                                                                                                                            |                               |      |                                                                                                                                                       |             |              |         |                                                                       |         |                                                                                                                                                                     |               |                      |      |                                                                                                                                                                                                                                                                                                                                            |
|----------------|---------------|-------------------------------------------------------------|----------------|----------|----------------------------------------------------------------------------------------------------------------------------|-------------------------------|------|-------------------------------------------------------------------------------------------------------------------------------------------------------|-------------|--------------|---------|-----------------------------------------------------------------------|---------|---------------------------------------------------------------------------------------------------------------------------------------------------------------------|---------------|----------------------|------|--------------------------------------------------------------------------------------------------------------------------------------------------------------------------------------------------------------------------------------------------------------------------------------------------------------------------------------------|
|                |               |                                                             |                |          |                                                                                                                            |                               |      |                                                                                                                                                       |             |              |         |                                                                       |         |                                                                                                                                                                     |               |                      |      | Median \$11,064 (IQR, \$0-\$175164)<br><br>General payments seemed consistent regardless of the extent of Twitter use, while research payments appeared greatest among those who use Twitter the least                                                                                                                                     |
| Toth 2019 [13] | November 2017 | N/A                                                         | N/A            | N/A      | Cross-sectional: Survey of 10 blog posts of nutritionists and registered dietitians in Ontario                             | Prevalence of 'potential' COI | None | 1/5 reported being the chair of the Professional Titles for Dietitians in Ontario Advocacy Group and 5/5 of authors are Ontario registered dietitians | Canada      | Canada       | Blogs   | Detoxification diets                                                  | English | Nutritionists and registered dietitians in Ontario                                                                                                                  | Not specified | Detox diets industry | None | <ul style="list-style-type: none"> <li>▪ <b>80%</b> (4/5) of nutritionist blog posts had a 'potential' COI (i.e., selling a product or service related to detox diets, including selling books, meal plan guides, and products such as juices)</li> <li>▪ <b>None</b> of registered dietitians blog posts had a 'potential' COI</li> </ul> |
| Vu 2021 [27]   | March 2021    | February 2008 (surgery)<br><br>November 2008 (radiotherapy) | September 2019 | 11 years | Cross-sectional: Survey of 80 YouTube videos on optimal treatment of prostate cancer: surgical therapy versus radiotherapy | Frequency of reporting of COI | None | None                                                                                                                                                  | Switzerland | Not reported | YouTube | Urology oncology: surgical therapy or radiotherapy of prostate cancer | English | Physicians, clinic, hospital or university<br><br>Others: patients, societies (foundations, governmental institutions, academic journals), industry, and news media | Not specified | Not specified        | None | <ul style="list-style-type: none"> <li>▪ <b>10%</b> (surgery) and <b>5%</b> (radiotherapy) of the providers included a disclosure of their conflicts of interest</li> <li>▪ Commercial bias: 15% (surgery videos) and 23% (radiotherapy videos) of the videos contained commercial bias</li> </ul>                                         |



|                   |            |          |            |     |                                                                                                                                                                                                                                                     |                                                        |      |                                                                                                                                                                                                 |               |               |         |                  |         |                                  |           |          |                        |                                                                                                                                                                                                                                                                                                                                                                                                                  |
|-------------------|------------|----------|------------|-----|-----------------------------------------------------------------------------------------------------------------------------------------------------------------------------------------------------------------------------------------------------|--------------------------------------------------------|------|-------------------------------------------------------------------------------------------------------------------------------------------------------------------------------------------------|---------------|---------------|---------|------------------|---------|----------------------------------|-----------|----------|------------------------|------------------------------------------------------------------------------------------------------------------------------------------------------------------------------------------------------------------------------------------------------------------------------------------------------------------------------------------------------------------------------------------------------------------|
| Walradt 2021 [20] | April 2020 | No limit | April 2020 | N/A | Cross-sectional: Survey of 956 tweets by gastroenterologists and surgeons, sharing gastrointestinal (GI) endoscopy videos/images. Selected after identifying those followed by at least 1 major US gastroenterology society and had > 500 followers | Prevalence of COI<br><br>Proportion of undisclosed COI | None | Potential competing interests: Dr. Berzin is a consultant for Wision AI, Boston Scientific, and Medtronic. All other authors disclosed no financial relationships relevant to this publication. | United States | United States | Twitter | Gastroenterology | English | Gastroenterologists and surgeons | Financial | Industry | Open Payments database | <ul style="list-style-type: none"> <li>▪ <b>37%</b> (7/19) of tweets that mentioned the name of a medical device were posted by a U.S physician who had received a payment (according to OPD) from the manufacturer of the device mentioned.</li> <li>▪ <b>None</b> of the physicians who had received a payment from the manufacturer of the device mentioned disclosed any financial relationships.</li> </ul> |
|-------------------|------------|----------|------------|-----|-----------------------------------------------------------------------------------------------------------------------------------------------------------------------------------------------------------------------------------------------------|--------------------------------------------------------|------|-------------------------------------------------------------------------------------------------------------------------------------------------------------------------------------------------|---------------|---------------|---------|------------------|---------|----------------------------------|-----------|----------|------------------------|------------------------------------------------------------------------------------------------------------------------------------------------------------------------------------------------------------------------------------------------------------------------------------------------------------------------------------------------------------------------------------------------------------------|

<sup>1</sup>Language was assumed based on the country of the individuals posting

#### ABBREVIATIONS:

COI: conflict of interest

FCOI: financial conflict of interest

OPD: Open Payment Database

FOAMed: Free Open Access Medical Education

N/A: Not available
