# Supplementary material for: Conflict of interest and funding in health communication on social media: a systematic review
Source: PubMed Central journal article supplement — BMJ Open. 2023 Aug 14;13(8):e072258. doi: 10.1136/bmjopen-2023-072258 (PMC10432670; doi:10.1136/bmjopen-2023-072258), 2023-08-14
Supplement: bmjopen-2023-072258supp006.pdf [file bmjopen-2023-072258supp006.pdf]

**Supplementary file 6:** Appraisal of the 17 included studies using Mixed Methods Appraisal Tool.

**Mixed Methods Appraisal Tool (MMAT)**

| First author   | Year | SCREENING QUESTIONS                     |                                                                    | 4. QUANTITATIVE DESCRIPTIVE STUDIES                                      |                                                             |                                        |                                           |                                                                               |
|----------------|------|-----------------------------------------|--------------------------------------------------------------------|--------------------------------------------------------------------------|-------------------------------------------------------------|----------------------------------------|-------------------------------------------|-------------------------------------------------------------------------------|
|                |      | S1. Are there clear research questions? | S2. Do the collected data allow to address the research questions? | 4.1. Is the sampling strategy relevant to address the research question? | 4.2. Is the sample representative of the target population? | 4.3. Are the measurements appropriate? | 4.4. Is the risk of nonresponse bias low? | 4.5. Is the statistical analysis appropriate to answer the research question? |
| Betschart [22] | 2020 | Yes                                     | Yes                                                                | Yes                                                                      | Yes                                                         | No <sup>1</sup>                        | Yes                                       | Yes                                                                           |
| Chretien [30]  | 2009 | Yes                                     | Yes                                                                | Yes                                                                      | Yes                                                         | Yes                                    | Yes                                       | Yes                                                                           |
| Chretien [21]  | 2011 | Yes                                     | Yes                                                                | Yes                                                                      | Yes                                                         | Yes                                    | Yes                                       | Yes                                                                           |
| Greysen [10]   | 2012 | Yes                                     | Yes                                                                | Yes                                                                      | Yes                                                         | Yes                                    | Yes                                       | Yes                                                                           |
| Hessari [31]   | 2019 | Yes                                     | Yes                                                                | Yes                                                                      | Yes                                                         | Yes                                    | Yes                                       | Yes                                                                           |
| Kaestner [29]  | 2017 | Yes                                     | Yes                                                                | Yes                                                                      | Yes                                                         | No <sup>2</sup>                        | Yes                                       | Yes                                                                           |
| Lagu [23]      | 2008 | Yes                                     | Yes                                                                | Yes                                                                      | Yes                                                         | No <sup>1</sup>                        | Yes                                       | Yes                                                                           |
| Miller [12]    | 2011 | Yes                                     | Yes                                                                | Yes                                                                      | Yes                                                         | No <sup>1</sup>                        | Yes                                       | Yes                                                                           |
| Niforatos [18] | 2019 | Yes                                     | Yes                                                                | Yes                                                                      | Yes                                                         | No <sup>2</sup>                        | Yes                                       | Yes                                                                           |
| Nishizaki [24] | 2021 | Yes                                     | Yes                                                                | Yes                                                                      | Yes                                                         | No <sup>1</sup>                        | Yes                                       | Yes                                                                           |
| Pratsinis [25] | 2021 | Yes                                     | Yes                                                                | Yes                                                                      | Yes                                                         | No <sup>1</sup>                        | Yes                                       | Yes                                                                           |
| Pratsinis [26] | 2021 | Yes                                     | Yes                                                                | Yes                                                                      | Yes                                                         | No <sup>1</sup>                        | Yes                                       | Yes                                                                           |
| Shrank [28]    | 2011 | Yes                                     | Yes                                                                | Yes                                                                      | Yes                                                         | No <sup>1</sup>                        | Yes                                       | Yes                                                                           |
| Tao [19]       | 2017 | Yes                                     | Yes                                                                | Yes                                                                      | Yes                                                         | Yes                                    | Yes                                       | Yes                                                                           |
| Toth [13]      | 2019 | Yes                                     | Yes                                                                | Yes                                                                      | Yes                                                         | Yes                                    | Yes                                       | Yes                                                                           |
| Vu [27]        | 2021 | Yes                                     | Yes                                                                | Yes                                                                      | Yes                                                         | No <sup>1</sup>                        | Yes                                       | Yes                                                                           |
| Walradt [20]   | 2021 | Yes                                     | Yes                                                                | Yes                                                                      | Yes                                                         | No <sup>2</sup>                        | Yes                                       | Yes                                                                           |

<sup>1</sup> It was not clear from any of the studies whether the percentage referred to the number of COI statements (whether reporting the existing or not of COI) or to the number of statements reporting a COI.

<sup>2</sup> It was not clear from any of the studies whether the proportion referred to those who reported no COI or those who had no COI statement.
